# Supplementary material for: How to enhance the effective spin-reversal barriers of two-coordinate Co(ii) imido complexes with [CoN]+ core? a theoretical investigation
Source: Royal Society of Chemistry journal article supplement (doi:10.1039/d3nj00482a), 2023-01-01
Supplement: d3nj00482a1.pdf [file d3nj00482a1.pdf]

## Supporting Information

### How to Enhance the Effective Spin-Reversal Barriers of Two-Coordinate Co(II) Imido Complexes with [CoN]<sup>+</sup> core? A Theoretical Investigation

Fang Lu, Tao Shang and Yi-Quan Zhang\*

*Jiangsu Key Lab for NSLSCS, School of Physical Science and Technology, Nanjing Normal University, Nanjing 210023, P. R. China*

\* To whom correspondence should be addressed, E-mail: [zhangyiquan@njnu.edu.cn](mailto:zhangyiquan@njnu.edu.cn)

**Table S1.** Specific crystallographic data of the bond lengths (Å) and angles  $\theta$  (°),  $\varphi$  (°) for **1** (**1\***), **2a** (**2a\***), **2b** (**2b\***) and **3** (**3\***).

| compounds                | $\theta$ | $\varphi$ | (carbene)C-Co | Co=N(amido) | N-C(arene) |
|--------------------------|----------|-----------|---------------|-------------|------------|
| <b>1</b> ( <b>1*</b> )   | 173.03   | 174.55    | 1.954         | 1.692       | 1.344      |
| <b>2a</b> ( <b>2a*</b> ) | 177.52   | 176.43    | 1.949         | 1.675       | 1.344      |
| <b>2b</b> ( <b>2b*</b> ) | 179.32   | 177.83    | 1.959         | 1.677       | 1.339      |
| <b>3</b> ( <b>3*</b> )   | 175.72   | 173.13    | 1.972         | 1.682       | 1.331      |

**Table S2.** Calculated energy levels (cm<sup>-1</sup>), **g** ( $g_x, g_y, g_z$ ) tensors and predominant  $m_J$  values of the original and simplified structures **1** (**1\***), **2a** (**2a\***), **2b** (**2b\***) and **3** (**3\***) by CAS (7, 5) using CASSCF/SINGLE\_ANISO<sup>1-3</sup> with ORCA 5.0.3.<sup>4</sup>

| CAS (7, 5) |                    |                          |           |                    |                          |           |
|------------|--------------------|--------------------------|-----------|--------------------|--------------------------|-----------|
| KDs        | <b>1</b>           |                          |           | <b>1*</b>          |                          |           |
|            | $E/\text{cm}^{-1}$ | <b>g</b>                 | $m_J$     | $E/\text{cm}^{-1}$ | <b>g</b>                 | $m_J$     |
| 0          | 0.0                | 0.001<br>0.002<br>11.775 | $\pm 9/2$ | 0.0                | 0.002<br>0.003<br>11.769 | $\pm 9/2$ |
| 1          | 358.9              | 0.017<br>0.017<br>8.095  | $\pm 7/2$ | 373.3              | 0.050<br>0.053<br>8.024  | $\pm 7/2$ |
| 2          | 767.9              | 0.191<br>0.207<br>4.448  | $\pm 3/2$ | 790.6              | 0.237<br>0.314<br>4.332  | $\pm 5/2$ |

|     |                    |                          |           |                    |                          |           |
|-----|--------------------|--------------------------|-----------|--------------------|--------------------------|-----------|
| 3   | 1210.0             | 0.047<br>0.180<br>4.691  | $\pm 1/2$ | 1250.1             | 0.015<br>0.313<br>3.155  | $\pm 1/2$ |
| 4   | 1295.8             | 0.028<br>0.134<br>5.733  | $\pm 5/2$ | 1349.1             | 0.040<br>0.084<br>7.194  | $\pm 3/2$ |
| KDs | <b>2a</b>          |                          |           | <b>2a*</b>         |                          |           |
|     | $E/\text{cm}^{-1}$ | <b>g</b>                 | $m_J$     | $E/\text{cm}^{-1}$ | <b>g</b>                 | $m_J$     |
| 0   | 0.0                | 0.006<br>0.008<br>11.766 | $\pm 9/2$ | 0.0                | 0.001<br>0.001<br>11.803 | $\pm 9/2$ |
| 1   | 304.2              | 0.075<br>0.077<br>8.325  | $\pm 7/2$ | 352.7              | 0.001<br>0.001<br>8.154  | $\pm 7/2$ |
| 2   | 682.2              | 0.211<br>0.340<br>4.777  | $\pm 3/2$ | 759.2              | 0.172<br>0.186<br>4.487  | $\pm 1/2$ |
| 3   | 1042.3             | 0.092<br>0.195<br>7.591  | $\pm 5/2$ | 1203.6             | 0.016<br>0.150<br>5.112  | $\pm 3/2$ |
| 4   | 1164.2             | 0.018<br>0.370<br>2.927  | $\pm 1/2$ | 1272.8             | 0.045<br>0.166<br>5.225  | $\pm 5/2$ |
| KDs | <b>2b</b>          |                          |           | <b>2b*</b>         |                          |           |
|     | $E/\text{cm}^{-1}$ | <b>g</b>                 | $m_J$     | $E/\text{cm}^{-1}$ | <b>g</b>                 | $m_J$     |
| 0   | 0.0                | 0.003<br>0.004<br>11.744 | $\pm 9/2$ | 0.0                | 0.001<br>0.001<br>11.790 | $\pm 9/2$ |
| 1   | 316.5              | 0.021<br>0.022<br>8.252  | $\pm 7/2$ | 356.9              | 0.009<br>0.009<br>8.122  | $\pm 7/2$ |
| 2   | 699.7              | 0.146<br>0.174<br>4.746  | $\pm 3/2$ | 764.9              | 0.173<br>0.176<br>4.472  | $\pm 1/2$ |
| 3   | 1063.3             | 0.107<br>0.127<br>7.273  | $\pm 5/2$ | 1205.7             | 0.014<br>0.144<br>4.983  | $\pm 3/2$ |
| 4   | 1190.9             | 0.050<br>0.239<br>3.301  | $\pm 1/2$ | 1286.4             | 0.039<br>0.138<br>5.425  | $\pm 5/2$ |
| KDs | <b>3</b>           |                          |           | <b>3*</b>          |                          |           |
|     | $E/\text{cm}^{-1}$ | <b>g</b>                 | $m_J$     | $E/\text{cm}^{-1}$ | <b>g</b>                 | $m_J$     |
| 0   | 0.0                | 0.001<br>0.001           | $\pm 9/2$ | 0.0                | 0.000<br>0.000           | $\pm 9/2$ |

|   |        |                         |           |        |                         |           |
|---|--------|-------------------------|-----------|--------|-------------------------|-----------|
|   |        | 11.910                  |           |        | 11.915                  |           |
| 1 | 395.1  | 0.002<br>0.003<br>8.194 | $\pm 7/2$ | 420.0  | 0.024<br>0.025<br>8.120 | $\pm 7/2$ |
| 2 | 811.5  | 0.104<br>0.108<br>4.689 | $\pm 3/2$ | 861.1  | 0.002<br>0.053<br>4.480 | $\pm 3/2$ |
| 3 | 1263.8 | 0.121<br>0.244<br>2.805 | $\pm 1/2$ | 1333.0 | 0.035<br>0.048<br>2.294 | $\pm 1/2$ |
| 4 | 1329.6 | 0.054<br>0.056<br>8.287 | $\pm 5/2$ | 1461.9 | 0.012<br>0.017<br>8.727 | $\pm 5/2$ |

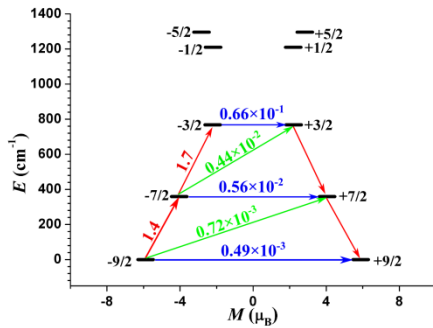

**1\_CAS (7, 5) \_767.9 cm<sup>-1</sup>**

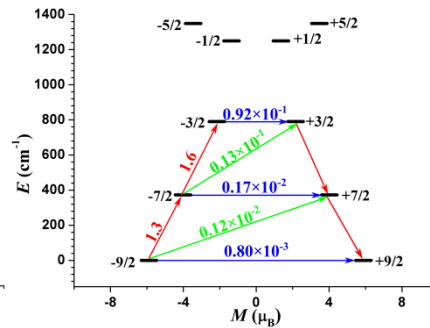

**1\*\_CAS (7, 5) \_790.6 cm<sup>-1</sup>**

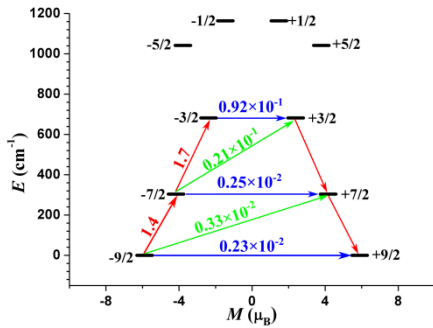

**2a\_CAS (7, 5) \_682.2 cm<sup>-1</sup>**

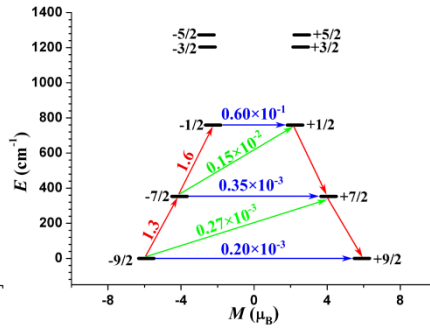

**2a\*\_CAS (7, 5) \_759.2 cm<sup>-1</sup>**

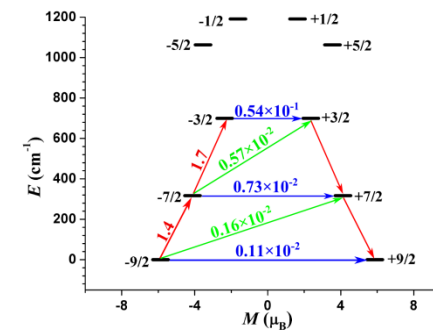

**2b\_CAS (7, 5) \_699.7 cm<sup>-1</sup>**

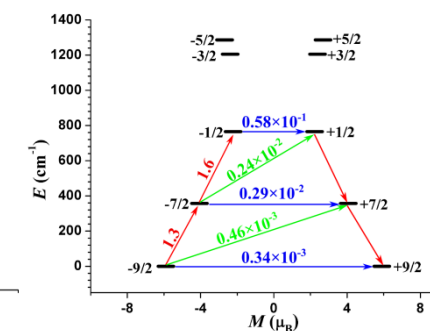

**2b\*\_CAS (7, 5) \_764.9 cm<sup>-1</sup>**

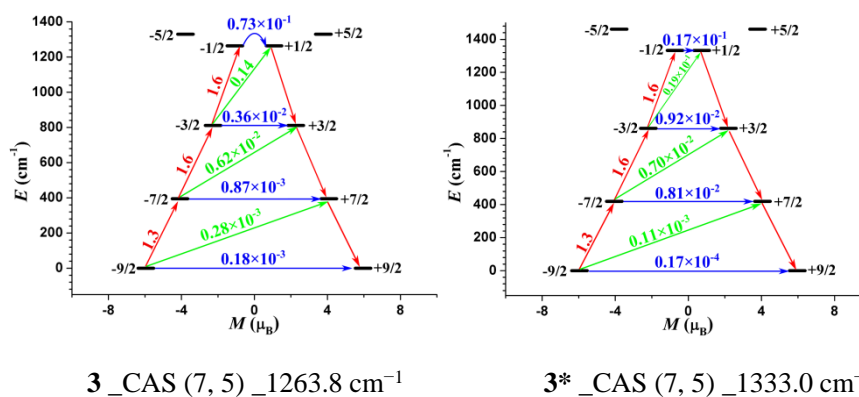

**Figure S1.** Magnetization blocking barriers for **1** (**1\***), **2a** (**2a\***), **2b** (**2b\***) and **3** (**3\***) by CAS (7, 5). The thick black lines represent the KDs of the Co<sup>II</sup> ion as a function of their magnetic moment along the magnetic axis. The blue lines correspond to diagonal matrix element of the transversal magnetic moment; the green lines represent Orbach relaxation processes. The path shown by the red arrows represent the most probable path for magnetic relaxation in the corresponding compounds. The numbers at each arrow stand for the mean absolute value of the corresponding matrix element of transition magnetic moment.

**Table S3.** Calculated Mulliken spin density on Co<sup>II</sup> for **1** (**1\***), **2a** (**2a\***), **2b** (**2b\***) and **3** (**3\***) at their spin state  $S = 3/2$  by CAS (7, 5) using CASSCF/SINGLE\_ANISO with ORCA 5.0.3.

|                  | <b>1</b> | <b>1*</b> | <b>2a</b> | <b>2a*</b> | <b>2b</b> | <b>2b*</b> | <b>3</b> | <b>3*</b> |
|------------------|----------|-----------|-----------|------------|-----------|------------|----------|-----------|
| Co <sup>II</sup> | 2.9427   | 2.9294    | 2.9395    | 2.9255     | 2.9438    | 2.9269     | 2.9482   | 2.9327    |

**Table S4.** Calculated crystal field parameters  $B(k, q)$  and the corresponding weights of **1** (**1\***), **2a** (**2a\***), **2b** (**2b\***) and **3** (**3\***) by CAS (7, 5) using CASSCF/SINGLE\_ANISO with ORCA 5.0.3.

| CAS (7, 5) |     |                        |            |           |     |                        |            |
|------------|-----|------------------------|------------|-----------|-----|------------------------|------------|
| <b>1</b>   |     |                        |            | <b>1*</b> |     |                        |            |
| $k$        | $q$ | $B(k, q)$              | Weight (%) | $k$       | $q$ | $B(k, q)$              | Weight (%) |
| 2          | -2  | $-0.15 \times 10^{-5}$ | 0.00       | 2         | -2  | $-0.26 \times 10^{-5}$ | 0.00       |
| 2          | -1  | $-0.14 \times 10^2$    | 6.13       | 2         | -1  | $-0.16 \times 10^2$    | 7.01       |
| 2          | 0   | $-0.89 \times 10^2$    | 38.70      | 2         | 0   | $-0.88 \times 10^2$    | 37.55      |
| 2          | 1   | $-0.10 \times 10^{-4}$ | 0.00       | 2         | 1   | $0.54 \times 10^{-6}$  | 0.00       |
| 2          | 2   | $-0.24 \times 10^2$    | 10.39      | 2         | 2   | $-0.25 \times 10^2$    | 10.88      |
| 4          | -4  | $-0.11 \times 10^{-6}$ | 0.00       | 4         | -4  | $0.12 \times 10^{-7}$  | 0.00       |
| 4          | -3  | $-0.10 \times 10^0$    | 1.22       | 4         | -3  | $-0.27 \times 10^0$    | 3.14       |
| 4          | -2  | $-0.13 \times 10^{-6}$ | 0.00       | 4         | -2  | $0.20 \times 10^{-6}$  | 0.00       |
| 4          | -1  | $0.54 \times 10^0$     | 6.42       | 4         | -1  | $0.74 \times 10^0$     | 8.50       |
| 4          | 0   | $0.81 \times 10^0$     | 9.57       | 4         | 0   | $0.64 \times 10^0$     | 7.38       |
| 4          | 1   | $0.92 \times 10^{-6}$  | 0.00       | 4         | 1   | $-0.40 \times 10^{-7}$ | 0.00       |
| 4          | 2   | $-0.16 \times 10^1$    | 19.34      | 4         | 2   | $-0.15 \times 10^1$    | 18.32      |
| 4          | 3   | $-0.69 \times 10^{-7}$ | 0.00       | 4         | 3   | $-0.51 \times 10^{-7}$ | 0.00       |
| 4          | 4   | $-0.43 \times 10^{-1}$ | 0.50       | 4         | 4   | $-0.27 \times 10^{-1}$ | 0.31       |
| 6          | -6  | $-0.34 \times 10^{-8}$ | 0.00       | 6         | -6  | $0.13 \times 10^{-9}$  | 0.00       |

|           |          |                                  |            |            |          |                                  |            |
|-----------|----------|----------------------------------|------------|------------|----------|----------------------------------|------------|
| 6         | -5       | $0.72 \times 10^{-5}$            | 0.00       | 6          | -5       | $-0.27 \times 10^{-3}$           | 0.02       |
| 6         | -4       | $0.13 \times 10^{-8}$            | 0.00       | 6          | -4       | $-0.65 \times 10^{-9}$           | 0.00       |
| 6         | -3       | $-0.11 \times 10^{-2}$           | 0.09       | 6          | -3       | $-0.23 \times 10^{-2}$           | 0.19       |
| 6         | -2       | $0.10 \times 10^{-7}$            | 0.00       | 6          | -2       | $0.44 \times 10^{-8}$            | 0.00       |
| 6         | -1       | $0.27 \times 10^{-1}$            | 2.38       | 6          | -1       | $0.30 \times 10^{-1}$            | 2.53       |
| 6         | 0        | $0.46 \times 10^{-1}$            | 4.04       | 6          | 0        | $0.36 \times 10^{-1}$            | 3.06       |
| 6         | 1        | $0.28 \times 10^{-7}$            | 0.00       | 6          | 1        | $-0.29 \times 10^{-8}$           | 0.00       |
| 6         | 2        | $-0.11 \times 10^{-1}$           | 1.00       | 6          | 2        | $-0.10 \times 10^{-1}$           | 0.90       |
| 6         | 3        | $-0.10 \times 10^{-7}$           | 0.00       | 6          | 3        | $-0.25 \times 10^{-8}$           | 0.00       |
| 6         | 4        | $-0.17 \times 10^{-2}$           | 0.15       | 6          | 4        | $-0.15 \times 10^{-2}$           | 0.13       |
| 6         | 5        | $0.84 \times 10^{-8}$            | 0.00       | 6          | 5        | $0.76 \times 10^{-9}$            | 0.00       |
| 6         | 6        | $0.16 \times 10^{-4}$            | 0.00       | 6          | 6        | $0.89 \times 10^{-4}$            | 0.00       |
| <b>2a</b> |          |                                  |            | <b>2a*</b> |          |                                  |            |
| <i>k</i>  | <i>q</i> | <i>B</i> ( <i>k</i> , <i>q</i> ) | Weight (%) | <i>k</i>   | <i>q</i> | <i>B</i> ( <i>k</i> , <i>q</i> ) | Weight (%) |
| 2         | -2       | $0.40 \times 10^1$               | 1.68       | 2          | -2       | $-0.23 \times 10^2$              | 11.57      |
| 2         | -1       | $-0.11 \times 10^0$              | 0.05       | 2          | -1       | $0.84 \times 10^0$               | 0.41       |
| 2         | 0        | $-0.89 \times 10^2$              | 37.59      | 2          | 0        | $-0.89 \times 10^2$              | 44.32      |
| 2         | 1        | $0.28 \times 10^1$               | 1.19       | 2          | 1        | $0.64 \times 10^0$               | 0.32       |
| 2         | 2        | $-0.22 \times 10^2$              | 9.36       | 2          | 2        | $-0.26 \times 10^0$              | 0.13       |
| 4         | -4       | $0.31 \times 10^{-1}$            | 0.35       | 4          | -4       | $-0.25 \times 10^{-3}$           | 0.00       |
| 4         | -3       | $-0.35 \times 10^{-1}$           | 0.40       | 4          | -3       | $0.86 \times 10^{-1}$            | 1.15       |
| 4         | -2       | $0.30 \times 10^0$               | 3.46       | 4          | -2       | $-0.15 \times 10^1$              | 20.38      |
| 4         | -1       | $0.17 \times 10^{-1}$            | 0.20       | 4          | -1       | $-0.94 \times 10^{-1}$           | 1.26       |
| 4         | 0        | $0.12 \times 10^1$               | 14.22      | 4          | 0        | $0.91 \times 10^0$               | 12.26      |
| 4         | 1        | $-0.25 \times 10^0$              | 2.89       | 4          | 1        | $-0.85 \times 10^{-1}$           | 1.14       |
| 4         | 2        | $-0.16 \times 10^1$              | 19.11      | 4          | 2        | $-0.11 \times 10^{-1}$           | 0.14       |
| 4         | 3        | $0.13 \times 10^0$               | 1.57       | 4          | 3        | $-0.88 \times 10^{-1}$           | 1.18       |
| 4         | 4        | $-0.84 \times 10^{-1}$           | 0.96       | 4          | 4        | $0.39 \times 10^{-1}$            | 0.53       |
| 6         | -6       | $0.67 \times 10^{-4}$            | 0.01       | 6          | -6       | $-0.68 \times 10^{-4}$           | 0.01       |
| 6         | -5       | $-0.69 \times 10^{-4}$           | 0.01       | 6          | -5       | $-0.11 \times 10^{-3}$           | 0.01       |
| 6         | -4       | $0.80 \times 10^{-3}$            | 0.06       | 6          | -4       | $-0.18 \times 10^{-4}$           | 0.00       |
| 6         | -3       | $-0.21 \times 10^{-3}$           | 0.02       | 6          | -3       | $0.58 \times 10^{-3}$            | 0.05       |
| 6         | -2       | $0.16 \times 10^{-2}$            | 0.13       | 6          | -2       | $-0.56 \times 10^{-2}$           | 0.55       |
| 6         | -1       | $0.23 \times 10^{-3}$            | 0.02       | 6          | -1       | $-0.74 \times 10^{-4}$           | 0.01       |
| 6         | 0        | $0.60 \times 10^{-1}$            | 5.10       | 6          | 0        | $0.43 \times 10^{-1}$            | 4.24       |
| 6         | 1        | $-0.61 \times 10^{-2}$           | 0.51       | 6          | 1        | $0.25 \times 10^{-3}$            | 0.02       |
| 6         | 2        | $-0.89 \times 10^{-2}$           | 0.75       | 6          | 2        | $-0.25 \times 10^{-3}$           | 0.02       |
| 6         | 3        | $0.88 \times 10^{-3}$            | 0.07       | 6          | 3        | $-0.57 \times 10^{-3}$           | 0.05       |
| 6         | 4        | $-0.21 \times 10^{-2}$           | 0.18       | 6          | 4        | $0.17 \times 10^{-2}$            | 0.16       |
| 6         | 5        | $0.15 \times 10^{-3}$            | 0.01       | 6          | 5        | $-0.11 \times 10^{-3}$           | 0.01       |
| 6         | 6        | $-0.11 \times 10^{-3}$           | 0.01       | 6          | 6        | $-0.18 \times 10^{-5}$           | 0.00       |
| <b>2b</b> |          |                                  |            | <b>2b*</b> |          |                                  |            |
| <i>k</i>  | <i>q</i> | <i>B</i> ( <i>k</i> , <i>q</i> ) | Weight (%) | <i>k</i>   | <i>q</i> | <i>B</i> ( <i>k</i> , <i>q</i> ) | Weight (%) |

|          |          |                                  |            |           |          |                                  |            |
|----------|----------|----------------------------------|------------|-----------|----------|----------------------------------|------------|
| 2        | -2       | $-0.68 \times 10^1$              | 2.48       | 2         | -2       | $0.50 \times 10^{-1}$            | 0.02       |
| 2        | -1       | $0.22 \times 10^1$               | 0.81       | 2         | -1       | $-0.10 \times 10^2$              | 4.80       |
| 2        | 0        | $-0.89 \times 10^2$              | 32.52      | 2         | 0        | $-0.89 \times 10^2$              | 40.22      |
| 2        | 1        | $-0.13 \times 10^2$              | 4.92       | 2         | 1        | $0.16 \times 10^0$               | 0.07       |
| 2        | 2        | $0.20 \times 10^2$               | 7.37       | 2         | 2        | $-0.22 \times 10^2$              | 10.20      |
| 4        | -4       | $0.40 \times 10^{-1}$            | 0.39       | 4         | -4       | $-0.10 \times 10^{-3}$           | 0.00       |
| 4        | -3       | $-0.72 \times 10^{-1}$           | 0.71       | 4         | -3       | $-0.14 \times 10^0$              | 1.74       |
| 4        | -2       | $-0.59 \times 10^0$              | 5.86       | 4         | -2       | $-0.38 \times 10^{-2}$           | 0.04       |
| 4        | -1       | $-0.80 \times 10^{-1}$           | 0.79       | 4         | -1       | $0.47 \times 10^0$               | 5.72       |
| 4        | 0        | $0.11 \times 10^1$               | 11.46      | 4         | 0        | $0.85 \times 10^0$               | 10.45      |
| 4        | 1        | $0.49 \times 10^0$               | 4.84       | 4         | 1        | $-0.13 \times 10^{-1}$           | 0.16       |
| 4        | 2        | $0.17 \times 10^1$               | 17.33      | 4         | 2        | $-0.15 \times 10^1$              | 19.47      |
| 4        | 3        | $0.13 \times 10^0$               | 1.36       | 4         | 3        | $0.21 \times 10^{-2}$            | 0.02       |
| 4        | 4        | $-0.52 \times 10^{-1}$           | 0.52       | 4         | 4        | $-0.38 \times 10^{-1}$           | 0.46       |
| 6        | -6       | $-0.35 \times 10^{-4}$           | 0.00       | 6         | -6       | $-0.75 \times 10^{-6}$           | 0.00       |
| 6        | -5       | $0.16 \times 10^{-3}$            | 0.01       | 6         | -5       | $-0.18 \times 10^{-3}$           | 0.01       |
| 6        | -4       | $0.12 \times 10^{-2}$            | 0.09       | 6         | -4       | $-0.92 \times 10^{-6}$           | 0.00       |
| 6        | -3       | $-0.79 \times 10^{-3}$           | 0.05       | 6         | -3       | $-0.74 \times 10^{-3}$           | 0.06       |
| 6        | -2       | $-0.49 \times 10^{-2}$           | 0.35       | 6         | -2       | $-0.12 \times 10^{-3}$           | 0.01       |
| 6        | -1       | $-0.45 \times 10^{-2}$           | 0.33       | 6         | -1       | $0.18 \times 10^{-1}$            | 1.65       |
| 6        | 0        | $0.61 \times 10^{-1}$            | 4.44       | 6         | 0        | $0.43 \times 10^{-1}$            | 3.87       |
| 6        | 1        | $0.27 \times 10^{-1}$            | 1.99       | 6         | 1        | $-0.40 \times 10^{-3}$           | 0.03       |
| 6        | 2        | $0.14 \times 10^{-1}$            | 1.03       | 6         | 2        | $-0.84 \times 10^{-2}$           | 0.75       |
| 6        | 3        | $0.14 \times 10^{-2}$            | 0.10       | 6         | 3        | $0.13 \times 10^{-4}$            | 0.00       |
| 6        | 4        | $-0.16 \times 10^{-2}$           | 0.11       | 6         | 4        | $-0.17 \times 10^{-2}$           | 0.15       |
| 6        | 5        | $-0.15 \times 10^{-3}$           | 0.01       | 6         | 5        | $0.14 \times 10^{-5}$            | 0.00       |
| 6        | 6        | $0.22 \times 10^{-4}$            | 0.00       | 6         | 6        | $0.69 \times 10^{-4}$            | 0.01       |
| <b>3</b> |          |                                  |            | <b>3*</b> |          |                                  |            |
| <i>k</i> | <i>q</i> | <i>B</i> ( <i>k</i> , <i>q</i> ) | Weight (%) | <i>k</i>  | <i>q</i> | <i>B</i> ( <i>k</i> , <i>q</i> ) | Weight (%) |
| 2        | -2       | $0.24 \times 10^1$               | 1.00       | 2         | -2       | $-0.50 \times 10^1$              | 2.16       |
| 2        | -1       | $-0.41 \times 10^1$              | 1.71       | 2         | -1       | $-0.24 \times 10^2$              | 10.50      |
| 2        | 0        | $-0.88 \times 10^2$              | 36.70      | 2         | 0        | $-0.87 \times 10^2$              | 37.25      |
| 2        | 1        | $0.26 \times 10^2$               | 11.10      | 2         | 1        | $-0.75 \times 10^1$              | 3.19       |
| 2        | 2        | $-0.72 \times 10^1$              | 3.02       | 2         | 2        | $0.75 \times 10^1$               | 3.21       |
| 4        | -4       | $0.71 \times 10^{-1}$            | 0.80       | 4         | -4       | $0.88 \times 10^{-1}$            | 1.01       |
| 4        | -3       | $-0.15 \times 10^0$              | 1.70       | 4         | -3       | $0.20 \times 10^0$               | 2.38       |
| 4        | -2       | $0.14 \times 10^0$               | 1.64       | 4         | -2       | $-0.15 \times 10^0$              | 1.73       |
| 4        | -1       | $0.26 \times 10^0$               | 2.92       | 4         | -1       | $0.15 \times 10^1$               | 18.29      |
| 4        | 0        | $0.26 \times 10^0$               | 2.94       | 4         | 0        | $-0.53 \times 10^{-1}$           | 0.61       |
| 4        | 1        | $-0.16 \times 10^1$              | 18.68      | 4         | 1        | $0.48 \times 10^0$               | 5.57       |
| 4        | 2        | $-0.41 \times 10^0$              | 4.69       | 4         | 2        | $0.22 \times 10^0$               | 2.57       |
| 4        | 3        | $0.29 \times 10^0$               | 3.27       | 4         | 3        | $0.25 \times 10^0$               | 2.93       |
| 4        | 4        | $-0.95 \times 10^{-1}$           | 1.07       | 4         | 4        | $-0.36 \times 10^{-1}$           | 0.41       |

|   |    |                        |      |   |    |                        |      |
|---|----|------------------------|------|---|----|------------------------|------|
| 6 | -6 | 0.10×10 <sup>-3</sup>  | 0.01 | 6 | -6 | -0.48×10 <sup>-4</sup> | 0.00 |
| 6 | -5 | -0.25×10 <sup>-3</sup> | 0.02 | 6 | -5 | -0.28×10 <sup>-4</sup> | 0.00 |
| 6 | -4 | 0.82×10 <sup>-3</sup>  | 0.06 | 6 | -4 | 0.95×10 <sup>-3</sup>  | 0.08 |
| 6 | -3 | -0.34×10 <sup>-3</sup> | 0.02 | 6 | -3 | -0.34×10 <sup>-3</sup> | 0.02 |
| 6 | -2 | -0.32×10 <sup>-2</sup> | 0.27 | 6 | -2 | 0.77×10 <sup>-2</sup>  | 0.65 |
| 6 | -1 | 0.71×10 <sup>-2</sup>  | 0.59 | 6 | -1 | 0.38×10 <sup>-1</sup>  | 3.27 |
| 6 | 0  | 0.33×10 <sup>-1</sup>  | 2.77 | 6 | 0  | 0.23×10 <sup>-1</sup>  | 2.00 |
| 6 | 1  | -0.46×10 <sup>-1</sup> | 3.87 | 6 | 1  | 0.11×10 <sup>-1</sup>  | 1.00 |
| 6 | 2  | 0.10×10 <sup>-1</sup>  | 0.86 | 6 | 2  | -0.11×10 <sup>-1</sup> | 0.97 |
| 6 | 3  | 0.59×10 <sup>-3</sup>  | 0.04 | 6 | 3  | -0.36×10 <sup>-3</sup> | 0.03 |
| 6 | 4  | -0.11×10 <sup>-2</sup> | 0.09 | 6 | 4  | -0.37×10 <sup>-3</sup> | 0.03 |
| 6 | 5  | 0.24×10 <sup>-3</sup>  | 0.02 | 6 | 5  | -0.31×10 <sup>-3</sup> | 0.02 |
| 6 | 6  | -0.75×10 <sup>-4</sup> | 0.01 | 6 | 6  | -0.10×10 <sup>-4</sup> | 0.00 |

**Table S5.** Calculated energy levels (cm<sup>-1</sup>), **g** ( $g_x$ ,  $g_y$ ,  $g_z$ ) tensors and predominant  $m_j$  values of the original and simplified structures of **1** (**1\***), **2a** (**2a\***), **2b** (**2b\***) and **3** (**3\***) by CAS (11, 7) using CASSCF/SINGLE\_ANISO with ORCA 5.0.3.

| CAS (11, 7) |                    |                          |       |                    |                          |       |
|-------------|--------------------|--------------------------|-------|--------------------|--------------------------|-------|
| KDs         | <b>1</b>           |                          |       | <b>1*</b>          |                          |       |
|             | $E/\text{cm}^{-1}$ | <b>g</b>                 | $m_j$ | $E/\text{cm}^{-1}$ | <b>g</b>                 | $m_j$ |
| 0           | 0.0                | 0.018<br>0.019<br>10.705 | ±9/2  | 0.0                | 0.001<br>0.001<br>10.846 | ±9/2  |
| 1           | 373.9              | 0.359<br>0.410<br>6.675  | ±7/2  | 387.6              | 0.113<br>0.114<br>6.817  | ±7/2  |
| 2           | 742.2              | 0.230<br>0.540<br>2.671  | ±3/2  | 783.3              | 0.177<br>0.386<br>2.773  | ±5/2  |
| 3           | 1126.1             | 0.137<br>0.145<br>1.345  | ±1/2  | 1194.0             | 0.184<br>0.214<br>1.289  | ±3/2  |
| 4           | 2238.5             | 0.860<br>1.024<br>5.712  | ±5/2  | 2382.1             | 0.300<br>0.604<br>9.496  | ±1/2  |
| KDs         | <b>2a</b>          |                          |       | <b>2a*</b>         |                          |       |
|             | $E/\text{cm}^{-1}$ | <b>g</b>                 | $m_j$ | $E/\text{cm}^{-1}$ | <b>g</b>                 | $m_j$ |
| 0           | 0.0                | 0.030<br>0.032<br>11.028 | ±9/2  | 0.0                | 0.077<br>0.024<br>11.098 | ±7/2  |
| 1           | 390.6              | 0.926<br>0.952<br>6.891  | ±5/2  | 388.3              | 1.298<br>1.597<br>5.519  | ±5/2  |
| 2           | 801.6              | 0.709                    | ±3/2  | 787.5              | 3.578                    | ±1/2  |

|     |                    |                          |           |                    |                          |           |
|-----|--------------------|--------------------------|-----------|--------------------|--------------------------|-----------|
|     |                    | 1.141<br>2.848           |           |                    | 3.390<br>0.564           |           |
| 3   | 1215.4             | 0.158<br>0.169<br>1.104  | $\pm 1/2$ | 1261.1             | 0.044<br>0.048<br>2.338  | $\pm 3/2$ |
| 4   | 2823.7             | 0.067<br>0.105<br>9.981  | $\pm 7/2$ | 2715.7             | 0.017<br>0.018<br>11.530 | $\pm 9/2$ |
| KDs | <b>2b</b>          |                          |           | <b>2b*</b>         |                          |           |
|     | $E/\text{cm}^{-1}$ | <b>g</b>                 | $m_J$     | $E/\text{cm}^{-1}$ | <b>g</b>                 | $m_J$     |
| 0   | 0.0                | 0.007<br>0.008<br>10.889 | $\pm 9/2$ | 0.0                | 0.005<br>0.005<br>10.822 | $\pm 9/2$ |
| 1   | 387.9              | 0.184<br>0.187<br>6.864  | $\pm 5/2$ | 386.4              | 0.132<br>0.136<br>6.794  | $\pm 5/2$ |
| 2   | 786.8              | 0.092<br>0.481<br>2.826  | $\pm 3/2$ | 781.0              | 0.138<br>0.422<br>2.754  | $\pm 3/2$ |
| 3   | 1202.2             | 0.186<br>0.217<br>1.233  | $\pm 1/2$ | 1190.2             | 0.188<br>0.214<br>1.303  | $\pm 1/2$ |
| 4   | 2242.8             | 0.116<br>0.195<br>9.710  | $\pm 7/2$ | 2398.3             | 0.092<br>0.159<br>9.668  | $\pm 7/2$ |
| KDs | <b>3</b>           |                          |           | <b>3*</b>          |                          |           |
|     | $E/\text{cm}^{-1}$ | <b>g</b>                 | $m_J$     | $E/\text{cm}^{-1}$ | <b>g</b>                 | $m_J$     |
| 0   | 0.0                | 0.005<br>0.005<br>10.161 | $\pm 9/2$ | 0.0                | 0.004<br>0.004<br>10.176 | $\pm 9/2$ |
| 1   | 295.2              | 0.375<br>0.378<br>6.151  | $\pm 5/2$ | 295.7              | 0.272<br>0.275<br>6.173  | $\pm 5/2$ |
| 2   | 646.0              | 0.366<br>0.387<br>2.143  | $\pm 3/2$ | 647.7              | 0.262<br>0.283<br>2.164  | $\pm 3/2$ |
| 3   | 1019.7             | 0.016<br>0.063<br>1.844  | $\pm 1/2$ | 1024.9             | 0.015<br>0.059<br>1.833  | $\pm 1/2$ |
| 4   | 2212.5             | 0.076<br>0.090<br>8.762  | $\pm 7/2$ | 2141.3             | 0.059<br>0.067<br>8.745  | $\pm 7/2$ |



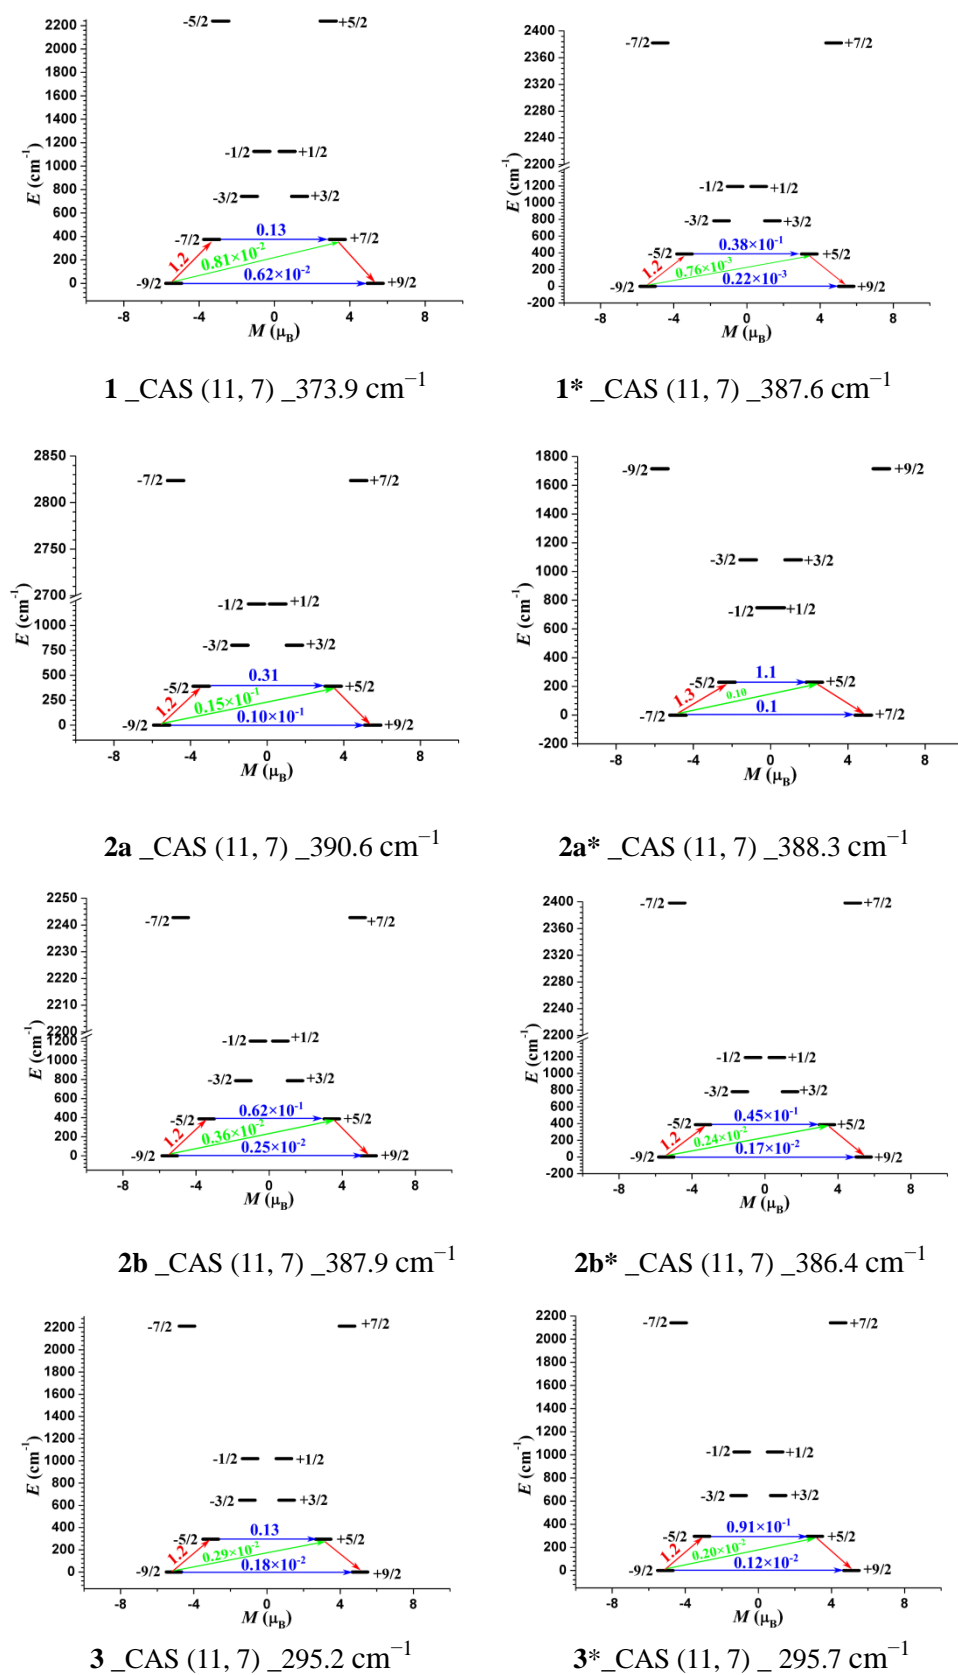

**Figure S2.** Magnetization blocking barriers for **1** (**1\***), **2a** (**2a\***), **2b** (**2b\***) and **3** (**3\***) by CAS (11, 7). The thick black lines represent the KDs of the  $\text{Co}^{\text{II}}$  ion as a function of their magnetic moment along the magnetic axis. The blue lines correspond to diagonal matrix element of the transversal

magnetic moment; the green lines represent Orbach relaxation processes. The path shown by the red arrows represent the most probable path for magnetic relaxation in the corresponding compounds. The numbers at each arrow stand for the mean absolute value of the corresponding matrix element of transition magnetic moment.

**Table S6.** Calculated Mulliken spin density on Co<sup>II</sup> for **1** (**1\***), **2a** (**2a\***), **2b** (**2b\***) and **3** (**3\***) at their spin state  $S = 3/2$  by CAS (11, 7) using CASSCF/SINGLE\_ANISO with ORCA 5.0.3.

|                  | <b>1</b> | <b>1*</b> | <b>2a</b> | <b>2a*</b> | <b>2b</b> | <b>2b*</b> | <b>3</b> | <b>3*</b> |
|------------------|----------|-----------|-----------|------------|-----------|------------|----------|-----------|
| Co <sup>II</sup> | 2.1482   | 2.1361    | 2.1056    | 2.1239     | 2.1248    | 2.1173     | 2.1414   | 2.1319    |

**Table S7.** Calculated crystal field parameters  $B(k, q)$  and the corresponding weights of **1** (**1\***), **2a** (**2a\***), **2b** (**2b\***) and **3** (**3\***) by CAS (11, 7) using CASSCF/SINGLE\_ANISO with ORCA 5.0.3.

| CAS (11, 7) |     |                        |            |            |     |                        |            |
|-------------|-----|------------------------|------------|------------|-----|------------------------|------------|
| <b>1</b>    |     |                        |            | <b>1*</b>  |     |                        |            |
| $k$         | $q$ | $B(k, q)$              | Weight (%) | $k$        | $q$ | $B(k, q)$              | Weight (%) |
| 2           | -2  | $0.62 \times 10^2$     | 8.46       | 2          | -2  | $0.68 \times 10^{-4}$  | 0.00       |
| 2           | -1  | $0.41 \times 10^1$     | 0.56       | 2          | -1  | $0.15 \times 10^{-4}$  | 0.00       |
| 2           | 0   | $-0.62 \times 10^2$    | 8.44       | 2          | 0   | $-0.64 \times 10^2$    | 10.79      |
| 2           | 1   | $0.54 \times 10^1$     | 0.73       | 2          | 1   | $0.11 \times 10^2$     | 1.88       |
| 2           | 2   | $-0.46 \times 10^2$    | 6.37       | 2          | 2   | $0.98 \times 10^1$     | 1.64       |
| 4           | -4  | $-0.91 \times 10^{-1}$ | 0.33       | 4          | -4  | $0.63 \times 10^{-6}$  | 0.00       |
| 4           | -3  | $-0.12 \times 10^0$    | 0.46       | 4          | -3  | $-0.98 \times 10^{-7}$ | 0.00       |
| 4           | -2  | $0.27 \times 10^1$     | 10.03      | 4          | -2  | $0.50 \times 10^{-6}$  | 0.00       |
| 4           | -1  | $0.60 \times 10^0$     | 2.23       | 4          | -1  | $0.13 \times 10^{-5}$  | 0.00       |
| 4           | 0   | $-0.99 \times 10^0$    | 3.65       | 4          | 0   | $0.38 \times 10^1$     | 17.47      |
| 4           | 1   | $-0.57 \times 10^{-1}$ | 0.21       | 4          | 1   | $-0.58 \times 10^{-1}$ | 0.26       |
| 4           | 2   | $0.69 \times 10^1$     | 25.77      | 4          | 2   | $0.70 \times 10^1$     | 31.83      |
| 4           | 3   | $0.15 \times 10^{-1}$  | 0.05       | 4          | 3   | $0.88 \times 10^{-1}$  | 0.39       |
| 4           | 4   | $-0.47 \times 10^0$    | 1.76       | 4          | 4   | $-0.52 \times 10^0$    | 2.37       |
| 6           | -6  | $-0.36 \times 10^{-1}$ | 0.98       | 6          | -6  | $0.26 \times 10^{-8}$  | 0.00       |
| 6           | -5  | $-0.45 \times 10^{-2}$ | 0.12       | 6          | -5  | $0.21 \times 10^{-7}$  | 0.00       |
| 6           | -4  | $-0.91 \times 10^{-2}$ | 0.24       | 6          | -4  | $0.75 \times 10^{-7}$  | 0.00       |
| 6           | -3  | $0.17 \times 10^{-1}$  | 0.48       | 6          | -3  | $0.91 \times 10^{-7}$  | 0.00       |
| 6           | -2  | $0.16 \times 10^0$     | 4.48       | 6          | -2  | $0.18 \times 10^{-6}$  | 0.00       |
| 6           | -1  | $-0.62 \times 10^{-1}$ | 1.68       | 6          | -1  | $-0.13 \times 10^{-6}$ | 0.00       |
| 6           | 0   | $0.55 \times 10^0$     | 15.01      | 6          | 0   | $0.53 \times 10^0$     | 17.90      |
| 6           | 1   | $0.68 \times 10^{-1}$  | 1.86       | 6          | 1   | $0.99 \times 10^{-1}$  | 3.30       |
| 6           | 2   | $0.11 \times 10^0$     | 3.08       | 6          | 2   | $0.21 \times 10^0$     | 7.25       |
| 6           | 3   | $-0.15 \times 10^{-1}$ | 0.40       | 6          | 3   | $-0.25 \times 10^{-1}$ | 0.85       |
| 6           | 4   | $-0.67 \times 10^{-1}$ | 1.83       | 6          | 4   | $-0.72 \times 10^{-1}$ | 2.40       |
| 6           | 5   | $-0.34 \times 10^{-2}$ | 0.09       | 6          | 5   | $-0.64 \times 10^{-2}$ | 0.21       |
| 6           | 6   | $0.21 \times 10^{-1}$  | 0.58       | 6          | 6   | $-0.41 \times 10^{-1}$ | 1.38       |
| <b>2a</b>   |     |                        |            | <b>2a*</b> |     |                        |            |

|           |     |                        |            |            |     |                        |            |
|-----------|-----|------------------------|------------|------------|-----|------------------------|------------|
| $k$       | $q$ | $B(k, q)$              | Weight (%) | $k$        | $q$ | $B(k, q)$              | Weight (%) |
| 2         | -2  | $-0.79 \times 10^{-1}$ | 0.01       | 2          | -2  | $-0.69 \times 10^2$    | 9.17       |
| 2         | -1  | $0.29 \times 10^1$     | 0.64       | 2          | -1  | $0.18 \times 10^2$     | 2.46       |
| 2         | 0   | $-0.99 \times 10^2$    | 21.89      | 2          | 0   | $-0.56 \times 10^2$    | 7.43       |
| 2         | 1   | $-0.75 \times 10^{-2}$ | 0.00       | 2          | 1   | $0.13 \times 10^2$     | 1.78       |
| 2         | 2   | $-0.84 \times 10^2$    | 18.73      | 2          | 2   | $-0.14 \times 10^1$    | 0.19       |
| 4         | -4  | $-0.29 \times 10^{-3}$ | 0.00       | 4          | -4  | $-0.19 \times 10^0$    | 0.71       |
| 4         | -3  | $-0.54 \times 10^{-1}$ | 0.32       | 4          | -3  | $-0.11 \times 10^{-1}$ | 0.04       |
| 4         | -2  | $-0.49 \times 10^{-2}$ | 0.02       | 4          | -2  | $-0.28 \times 10^1$    | 10.15      |
| 4         | -1  | $0.25 \times 10^{-2}$  | 0.01       | 4          | -1  | $0.74 \times 10^0$     | 2.67       |
| 4         | 0   | $0.16 \times 10^1$     | 9.70       | 4          | 0   | $0.74 \times 10^1$     | 26.73      |
| 4         | 1   | $0.18 \times 10^{-2}$  | 0.01       | 4          | 1   | $0.90 \times 10^0$     | 3.24       |
| 4         | 2   | $-0.63 \times 10^1$    | 37.96      | 4          | 2   | $0.15 \times 10^1$     | 5.49       |
| 4         | 3   | $-0.12 \times 10^{-2}$ | 0.00       | 4          | 3   | $-0.49 \times 10^{-1}$ | 0.17       |
| 4         | 4   | $-0.19 \times 10^0$    | 1.17       | 4          | 4   | $-0.28 \times 10^0$    | 1.00       |
| 6         | -6  | $0.29 \times 10^{-4}$  | 0.00       | 6          | -6  | $0.16 \times 10^{-1}$  | 0.43       |
| 6         | -5  | $-0.55 \times 10^{-3}$ | 0.02       | 6          | -5  | $-0.41 \times 10^{-2}$ | 0.11       |
| 6         | -4  | $-0.60 \times 10^{-4}$ | 0.00       | 6          | -4  | $-0.28 \times 10^{-1}$ | 0.76       |
| 6         | -3  | $0.16 \times 10^{-2}$  | 0.07       | 6          | -3  | $-0.42 \times 10^{-2}$ | 0.11       |
| 6         | -2  | $-0.39 \times 10^{-4}$ | 0.00       | 6          | -2  | $-0.11 \times 10^0$    | 3.05       |
| 6         | -1  | $-0.27 \times 10^{-2}$ | 0.12       | 6          | -1  | $0.86 \times 10^{-1}$  | 2.27       |
| 6         | 0   | $0.10 \times 10^0$     | 4.50       | 6          | 0   | $0.53 \times 10^0$     | 14.12      |
| 6         | 1   | $0.52 \times 10^{-4}$  | 0.00       | 6          | 1   | $-0.29 \times 10^{-1}$ | 0.77       |
| 6         | 2   | $-0.60 \times 10^{-1}$ | 2.66       | 6          | 2   | $0.18 \times 10^0$     | 4.97       |
| 6         | 3   | $0.97 \times 10^{-5}$  | 0.00       | 6          | 3   | $0.12 \times 10^{-1}$  | 0.32       |
| 6         | 4   | $-0.36 \times 10^{-1}$ | 1.58       | 6          | 4   | $-0.38 \times 10^{-1}$ | 1.00       |
| 6         | 5   | $-0.13 \times 10^{-4}$ | 0.00       | 6          | 5   | $0.69 \times 10^{-3}$  | 0.01       |
| 6         | 6   | $0.11 \times 10^{-1}$  | 0.48       | 6          | 6   | $-0.27 \times 10^{-1}$ | 0.71       |
| <b>2b</b> |     |                        |            | <b>2b*</b> |     |                        |            |
| $k$       | $q$ | $B(k, q)$              | Weight (%) | $k$        | $q$ | $B(k, q)$              | Weight (%) |
| 2         | -2  | $-0.78 \times 10^2$    | 14.31      | 2          | -2  | $-0.60 \times 10^2$    | 8.62       |
| 2         | -1  | $0.50 \times 10^1$     | 0.91       | 2          | -1  | $0.28 \times 10^1$     | 0.40       |
| 2         | 0   | $-0.95 \times 10^2$    | 17.41      | 2          | 0   | $-0.56 \times 10^2$    | 8.16       |
| 2         | 1   | $0.49 \times 10^1$     | 0.89       | 2          | 1   | $-0.44 \times 10^1$    | 0.64       |
| 2         | 2   | $0.64 \times 10^1$     | 1.17       | 2          | 2   | $0.42 \times 10^1$     | 0.61       |
| 4         | -4  | $0.14 \times 10^{-1}$  | 0.06       | 4          | -4  | $-0.11 \times 10^0$    | 0.44       |
| 4         | -3  | $0.33 \times 10^0$     | 1.65       | 4          | -3  | $0.11 \times 10^{-1}$  | 0.04       |
| 4         | -2  | $-0.63 \times 10^1$    | 31.16      | 4          | -2  | $-0.24 \times 10^1$    | 9.51       |
| 4         | -1  | $-0.11 \times 10^1$    | 5.51       | 4          | -1  | $0.21 \times 10^0$     | 0.84       |
| 4         | 0   | $0.15 \times 10^1$     | 7.52       | 4          | 0   | $0.74 \times 10^1$     | 28.93      |
| 4         | 1   | $-0.10 \times 10^1$    | 5.21       | 4          | 1   | $-0.26 \times 10^0$    | 1.03       |
| 4         | 2   | $0.36 \times 10^0$     | 1.79       | 4          | 2   | $0.24 \times 10^1$     | 9.48       |
| 4         | 3   | $-0.36 \times 10^0$    | 1.82       | 4          | 3   | $-0.59 \times 10^{-1}$ | 0.23       |

|          |          |                                  |            |           |          |                                  |            |
|----------|----------|----------------------------------|------------|-----------|----------|----------------------------------|------------|
| 4        | 4        | $0.25 \times 10^0$               | 1.24       | 4         | 4        | $-0.37 \times 10^0$              | 1.45       |
| 6        | -6       | $-0.11 \times 10^{-1}$           | 0.40       | 6         | -6       | $0.20 \times 10^{-1}$            | 0.58       |
| 6        | -5       | $-0.43 \times 10^{-2}$           | 0.15       | 6         | -5       | $0.69 \times 10^{-5}$            | 0.00       |
| 6        | -4       | $0.21 \times 10^{-2}$            | 0.07       | 6         | -4       | $-0.17 \times 10^{-1}$           | 0.48       |
| 6        | -3       | $-0.33 \times 10^{-2}$           | 0.12       | 6         | -3       | $0.27 \times 10^{-2}$            | 0.07       |
| 6        | -2       | $-0.38 \times 10^{-1}$           | 1.38       | 6         | -2       | $-0.12 \times 10^0$              | 3.62       |
| 6        | -1       | $-0.24 \times 10^{-1}$           | 0.87       | 6         | -1       | $-0.41 \times 10^{-2}$           | 0.11       |
| 6        | 0        | $0.92 \times 10^{-1}$            | 3.36       | 6         | 0        | $0.54 \times 10^0$               | 15.69      |
| 6        | 1        | $-0.19 \times 10^{-1}$           | 0.70       | 6         | 1        | $-0.34 \times 10^{-1}$           | 0.98       |
| 6        | 2        | $0.14 \times 10^{-1}$            | 0.54       | 6         | 2        | $0.19 \times 10^0$               | 5.59       |
| 6        | 3        | $0.21 \times 10^{-2}$            | 0.07       | 6         | 3        | $-0.23 \times 10^{-2}$           | 0.06       |
| 6        | 4        | $0.38 \times 10^{-1}$            | 1.40       | 6         | 4        | $-0.51 \times 10^{-1}$           | 1.46       |
| 6        | 5        | $-0.36 \times 10^{-2}$           | 0.13       | 6         | 5        | $0.14 \times 10^{-2}$            | 0.04       |
| 6        | 6        | $0.13 \times 10^{-2}$            | 0.04       | 6         | 6        | $-0.28 \times 10^{-1}$           | 0.80       |
| <b>3</b> |          |                                  |            | <b>3*</b> |          |                                  |            |
| <i>k</i> | <i>q</i> | <i>B</i> ( <i>k</i> , <i>q</i> ) | Weight (%) | <i>k</i>  | <i>q</i> | <i>B</i> ( <i>k</i> , <i>q</i> ) | Weight (%) |
| 2        | -2       | $-0.74 \times 10^2$              | 9.76       | 2         | -2       | $-0.36 \times 10^0$              | 0.05       |
| 2        | -1       | $-0.27 \times 10^2$              | 3.59       | 2         | -1       | $-0.41 \times 10^2$              | 6.11       |
| 2        | 0        | $-0.40 \times 10^2$              | 5.28       | 2         | 0        | $-0.46 \times 10^2$              | 6.83       |
| 2        | 1        | $-0.24 \times 10^2$              | 3.15       | 2         | 1        | $-0.61 \times 10^{-1}$           | 0.01       |
| 2        | 2        | $0.76 \times 10^1$               | 0.99       | 2         | 2        | $0.76 \times 10^2$               | 11.11      |
| 4        | -4       | $-0.10 \times 10^0$              | 0.38       | 4         | -4       | $0.35 \times 10^{-2}$            | 0.01       |
| 4        | -3       | $0.13 \times 10^0$               | 0.47       | 4         | -3       | $-0.15 \times 10^0$              | 0.62       |
| 4        | -2       | $-0.34 \times 10^1$              | 12.18      | 4         | -2       | $-0.12 \times 10^{-1}$           | 0.04       |
| 4        | -1       | $-0.23 \times 10^1$              | 8.22       | 4         | -1       | $-0.34 \times 10^1$              | 13.73      |
| 4        | 0        | $0.69 \times 10^1$               | 24.70      | 4         | 0        | $0.68 \times 10^1$               | 27.23      |
| 4        | 1        | $-0.21 \times 10^1$              | 7.46       | 4         | 1        | $-0.75 \times 10^{-2}$           | 0.02       |
| 4        | 2        | $0.59 \times 10^0$               | 2.10       | 4         | 2        | $0.34 \times 10^1$               | 13.74      |
| 4        | 3        | $-0.47 \times 10^{-1}$           | 0.16       | 4         | 3        | $-0.26 \times 10^{-2}$           | 0.01       |
| 4        | 4        | $0.11 \times 10^0$               | 0.40       | 4         | 4        | $-0.15 \times 10^0$              | 0.61       |
| 6        | -6       | $-0.97 \times 10^{-2}$           | 0.25       | 6         | -6       | $0.39 \times 10^{-3}$            | 0.01       |
| 6        | -5       | $-0.57 \times 10^{-3}$           | 0.01       | 6         | -5       | $0.67 \times 10^{-2}$            | 0.19       |
| 6        | -4       | $-0.14 \times 10^{-1}$           | 0.38       | 6         | -4       | $0.54 \times 10^{-3}$            | 0.01       |
| 6        | -3       | $-0.74 \times 10^{-2}$           | 0.19       | 6         | -3       | $0.11 \times 10^{-1}$            | 0.32       |
| 6        | -2       | $-0.73 \times 10^{-2}$           | 0.19       | 6         | -2       | $0.17 \times 10^{-2}$            | 0.05       |
| 6        | -1       | $-0.10 \times 10^0$              | 2.65       | 6         | -1       | $-0.11 \times 10^0$              | 3.29       |
| 6        | 0        | $0.50 \times 10^0$               | 13.03      | 6         | 0        | $0.48 \times 10^0$               | 13.98      |
| 6        | 1        | $-0.39 \times 10^{-1}$           | 1.01       | 6         | 1        | $0.32 \times 10^{-3}$            | 0.01       |
| 6        | 2        | $0.10 \times 10^0$               | 2.59       | 6         | 2        | $-0.26 \times 10^{-1}$           | 0.76       |
| 6        | 3        | $-0.37 \times 10^{-2}$           | 0.09       | 6         | 3        | $0.28 \times 10^{-3}$            | 0.01       |
| 6        | 4        | $0.15 \times 10^{-1}$            | 0.40       | 6         | 4        | $-0.24 \times 10^{-1}$           | 0.69       |
| 6        | 5        | $-0.38 \times 10^{-2}$           | 0.09       | 6         | 5        | $0.16 \times 10^{-3}$            | 0.00       |
| 6        | 6        | $-0.62 \times 10^{-2}$           | 0.16       | 6         | 6        | $-0.15 \times 10^{-1}$           | 0.43       |

**Table S8.** Calculated energy levels ( $\text{cm}^{-1}$ ),  $\mathbf{g}$  ( $g_x, g_y, g_z$ ) tensors and predominant  $m_J$  values of the original and simplified structures of **1** (**1\***), **2a** (**2a\***), **2b** (**2b\***) and **3** (**3\***) by CAS (11, 8) using CASSCF/SINGLE\_ANISO with ORCA 5.0.3.

| CAS (11, 8) |                    |                          |           |                    |                          |           |
|-------------|--------------------|--------------------------|-----------|--------------------|--------------------------|-----------|
| KDs         | <b>1</b>           |                          |           | <b>1*</b>          |                          |           |
|             | $E/\text{cm}^{-1}$ | $\mathbf{g}$             | $m_J$     | $E/\text{cm}^{-1}$ | $\mathbf{g}$             | $m_J$     |
| 0           | 0.0                | 0.007<br>0.007<br>10.155 | $\pm 9/2$ | 0.0                | 0.008<br>0.008<br>10.164 | $\pm 9/2$ |
| 1           | 287.5              | 0.434<br>0.436<br>6.152  | $\pm 5/2$ | 287.7              | 0.512<br>0.514<br>6.153  | $\pm 5/2$ |
| 2           | 641.2              | 0.398<br>0.458<br>2.137  | $\pm 3/2$ | 644.5              | 0.485<br>0.525<br>2.138  | $\pm 3/2$ |
| 3           | 1014.3             | 0.030<br>0.101<br>1.845  | $\pm 1/2$ | 1021.0             | 0.024<br>0.089<br>1.838  | $\pm 1/2$ |
| 4           | 1797.8             | 0.202<br>0.233<br>8.324  | $\pm 7/2$ | 1754.6             | 0.184<br>0.205<br>8.355  | $\pm 7/2$ |
| KDs         | <b>2a</b>          |                          |           | <b>2a*</b>         |                          |           |
|             | $E/\text{cm}^{-1}$ | $\mathbf{g}$             | $m_J$     | $E/\text{cm}^{-1}$ | $\mathbf{g}$             | $m_J$     |
| 0           | 0.0                | 0.084<br>0.102<br>10.863 | $\pm 9/2$ | 0.0                | 0.004<br>0.005<br>10.150 | $\pm 9/2$ |
| 1           | 312.0              | 0.364<br>0.373<br>7.474  | $\pm 7/2$ | 291.8              | 0.372<br>0.374<br>6.147  | $\pm 5/2$ |
| 2           | 795.5              | 1.644<br>1.946<br>6.434  | $\pm 5/2$ | 645.6              | 0.353<br>0.383<br>2.137  | $\pm 3/2$ |
| 3           | 822.6              | 0.420<br>1.000<br>3.128  | $\pm 3/2$ | 1022.1             | 0.027<br>0.074<br>1.850  | $\pm 1/2$ |
| 4           | 1200.3             | 2.830<br>2.069<br>0.929  | $\pm 1/2$ | 1959.7             | 0.131<br>0.146<br>8.529  | $\pm 7/2$ |
| KDs         | <b>2b</b>          |                          |           | <b>2b*</b>         |                          |           |
|             | $E/\text{cm}^{-1}$ | $\mathbf{g}$             | $m_J$     | $E/\text{cm}^{-1}$ | $\mathbf{g}$             | $m_J$     |
| 0           | 0.0                | 0.117<br>0.144<br>10.797 | $\pm 9/2$ | 0.0                | 0.005<br>0.006<br>10.150 | $\pm 9/2$ |
| 1           | 333.9              | 0.421                    | $\pm 7/2$ | 291.0              | 0.386                    | $\pm 5/2$ |

|     |                    |                          |           |                    |                          |           |
|-----|--------------------|--------------------------|-----------|--------------------|--------------------------|-----------|
|     |                    | 0.436<br>7.401           |           |                    | 0.387<br>6.147           |           |
| 2   | 709.1              | 1.996<br>2.355<br>6.129  | $\pm 5/2$ | 644.7              | 0.364<br>0.400<br>2.136  | $\pm 3/2$ |
| 3   | 798.6              | 0.535<br>1.217<br>3.040  | $\pm 3/2$ | 1020.0             | 0.029<br>0.080<br>1.849  | $\pm 1/2$ |
| 4   | 1111.6             | 1.281<br>1.711<br>3.383  | $\pm 1/2$ | 1931.6             | 0.164<br>0.184<br>8.459  | $\pm 7/2$ |
| KDs | <b>3</b>           |                          |           | <b>3*</b>          |                          |           |
|     | $E/\text{cm}^{-1}$ | $g$                      | $m_J$     | $E/\text{cm}^{-1}$ | $g$                      | $m_J$     |
| 0   | 0.0                | 0.011<br>0.012<br>10.688 | $\pm 9/2$ | 0.0                | 0.005<br>0.006<br>10.750 | $\pm 9/2$ |
| 1   | 378.8              | 0.386<br>0.399<br>6.643  | $\pm 5/2$ | 382.5              | 0.137<br>0.142<br>6.706  | $\pm 5/2$ |
| 2   | 762.0              | 0.111<br>0.690<br>2.609  | $\pm 3/2$ | 771.2              | 0.175<br>0.479<br>2.659  | $\pm 3/2$ |
| 3   | 1155.7             | 0.207<br>0.220<br>1.417  | $\pm 1/2$ | 1174.0             | 0.223<br>0.238<br>1.393  | $\pm 1/2$ |
| 4   | 2874.4             | 0.028<br>0.037<br>9.733  | $\pm 7/2$ | 2902.2             | 0.035<br>0.054<br>10.280 | $\pm 7/2$ |

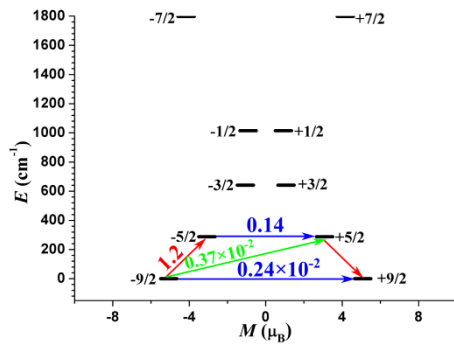

1\_CAS (11, 8)  $_{287.5 \text{ cm}^{-1}}$

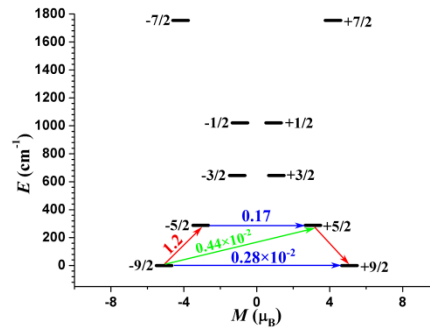

1\*\_CAS (11, 8)  $_{287.7 \text{ cm}^{-1}}$

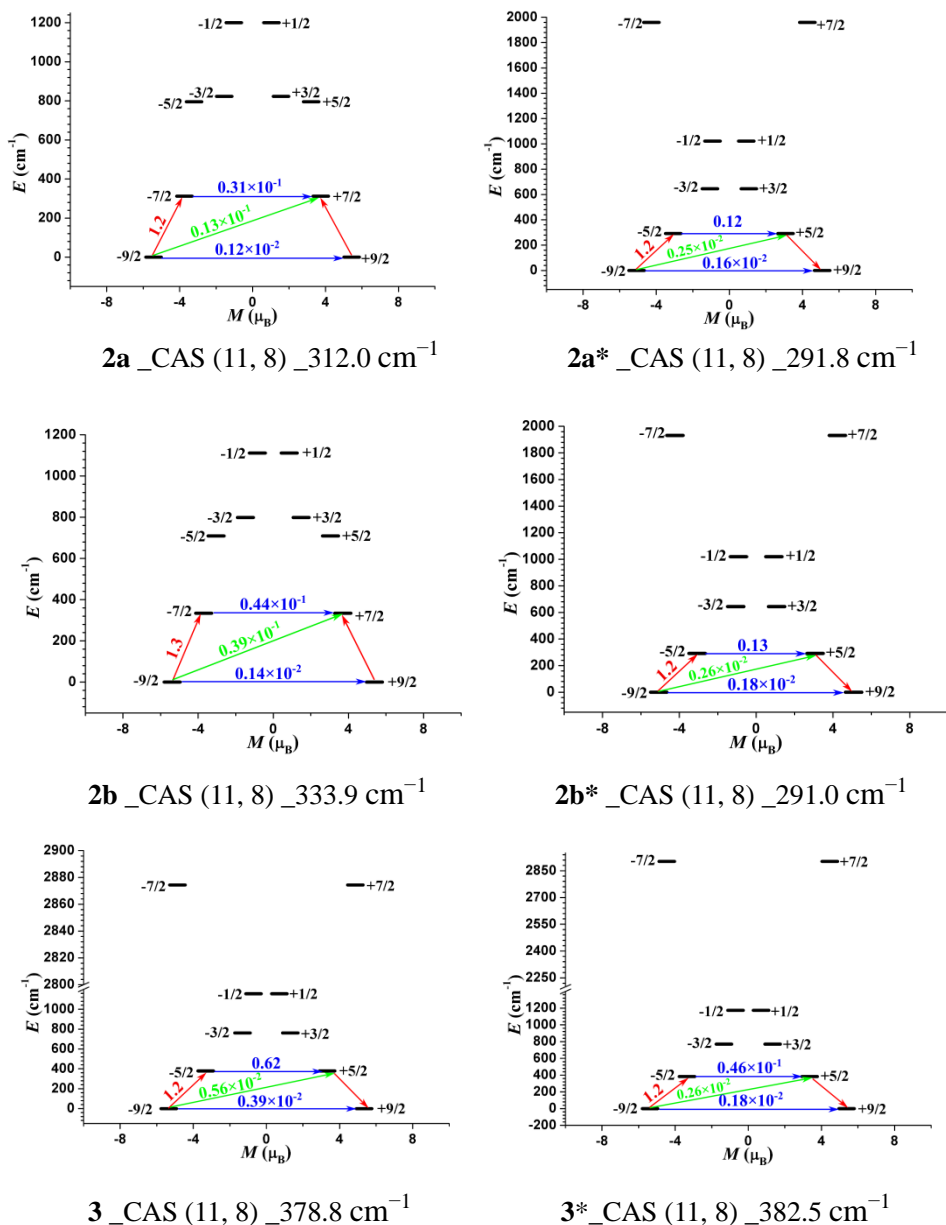

**Figure S3.** Magnetization blocking barriers for **1** (**1\***), **2a** (**2a\***), **2b** (**2b\***) and **3** (**3\***) by CAS (11, 8). The thick black lines represent the KDs of the Co<sup>II</sup> ion as a function of their magnetic moment along the magnetic axis. The blue lines correspond to diagonal matrix element of the transversal magnetic moment; the green lines represent Orbach relaxation processes. The path shown by the red arrows represent the most probable path for magnetic relaxation in the corresponding compounds. The numbers at each arrow stand for the mean absolute value of the corresponding matrix element of transition magnetic moment.

**Table S9.** Calculated Mulliken spin density on Co<sup>II</sup> for **1** (**1\***), **2a** (**2a\***), **2b** (**2b\***) and **3** (**3\***) at their spin state  $S = 3/2$  by CAS (11, 8) using CASSCF/SINGLE\_ANISO with ORCA 5.0.3.

|                  | <b>1</b> | <b>1*</b> | <b>2a</b> | <b>2a*</b> | <b>2b</b> | <b>2b*</b> | <b>3</b> | <b>3*</b> |
|------------------|----------|-----------|-----------|------------|-----------|------------|----------|-----------|
| Co <sup>II</sup> | 2.0114   | 2.0183    | 2.0191    | 2.0162     | 2.0245    | 2.0134     | 2.0242   | 2.0167    |

**Table S10.** Calculated crystal field parameters  $B$  ( $k$ ,  $q$ ) and the corresponding weights of **1** (**1\***), **2a**

(2a\*), 2b (2b\*) and 3 (3\*) by CAS (11, 8) using CASSCF/SINGLE\_ANISO with ORCA 5.0.3.

| CAS (11, 8) |          |                                  |            |          |          |                                  |            |
|-------------|----------|----------------------------------|------------|----------|----------|----------------------------------|------------|
| 1           |          |                                  |            | 1*       |          |                                  |            |
| <i>k</i>    | <i>q</i> | <i>B</i> ( <i>k</i> , <i>q</i> ) | Weight (%) | <i>k</i> | <i>q</i> | <i>B</i> ( <i>k</i> , <i>q</i> ) | Weight (%) |
| 2           | -2       | -0.51×10 <sup>0</sup>            | 0.06       | 2        | -2       | 0.14×10 <sup>0</sup>             | 0.04       |
| 2           | -1       | -0.14×10 <sup>2</sup>            | 1.98       | 2        | -1       | -0.25×10 <sup>-1</sup>           | 0.01       |
| 2           | 0        | -0.14×10 <sup>3</sup>            | 20.28      | 2        | 0        | -0.84×10 <sup>2</sup>            | 21.04      |
| 2           | 1        | -0.23×10 <sup>1</sup>            | 0.32       | 2        | 1        | 0.20×10 <sup>1</sup>             | 0.50       |
| 2           | 2        | 0.11×10 <sup>3</sup>             | 16.13      | 2        | 2        | -0.55×10 <sup>2</sup>            | 13.67      |
| 4           | -4       | 0.78×10 <sup>-1</sup>            | 0.28       | 4        | -4       | 0.15×10 <sup>-3</sup>            | 0.00       |
| 4           | -3       | -0.59×10 <sup>0</sup>            | 2.18       | 4        | -3       | -0.14×10 <sup>-2</sup>           | 0.01       |
| 4           | -2       | 0.14×10 <sup>0</sup>             | 0.54       | 4        | -2       | 0.11×10 <sup>-1</sup>            | 0.07       |
| 4           | -1       | -0.52×10 <sup>0</sup>            | 1.93       | 4        | -1       | 0.18×10 <sup>-1</sup>            | 0.12       |
| 4           | 0        | -0.86×10 <sup>0</sup>            | 3.19       | 4        | 0        | 0.36×10 <sup>0</sup>             | 2.42       |
| 4           | 1        | -0.25×10 <sup>-1</sup>           | 0.09       | 4        | 1        | 0.41×10 <sup>0</sup>             | 2.82       |
| 4           | 2        | 0.80×10 <sup>1</sup>             | 29.82      | 4        | 2        | -0.45×10 <sup>1</sup>            | 30.85      |
| 4           | 3        | 0.14×10 <sup>0</sup>             | 0.53       | 4        | 3        | 0.28×10 <sup>0</sup>             | 1.91       |
| 4           | 4        | 0.33×10 <sup>0</sup>             | 1.25       | 4        | 4        | -0.24×10 <sup>-1</sup>           | 0.16       |
| 6           | -6       | 0.16×10 <sup>-1</sup>            | 0.45       | 6        | -6       | 0.55×10 <sup>-5</sup>            | 0.00       |
| 6           | -5       | 0.19×10 <sup>-1</sup>            | 0.53       | 6        | -5       | 0.99×10 <sup>-5</sup>            | 0.00       |
| 6           | -4       | 0.79×10 <sup>-2</sup>            | 0.21       | 6        | -4       | 0.31×10 <sup>-5</sup>            | 0.00       |
| 6           | -3       | -0.31×10 <sup>-1</sup>           | 0.85       | 6        | -3       | -0.80×10 <sup>-4</sup>           | 0.00       |
| 6           | -2       | -0.10×10 <sup>-1</sup>           | 0.28       | 6        | -2       | 0.51×10 <sup>-3</sup>            | 0.03       |
| 6           | -1       | 0.77×10 <sup>-1</sup>            | 2.09       | 6        | -1       | 0.91×10 <sup>-3</sup>            | 0.05       |
| 6           | 0        | -0.24×10 <sup>0</sup>            | 6.74       | 6        | 0        | -0.28×10 <sup>0</sup>            | 13.97      |
| 6           | 1        | -0.14×10 <sup>-1</sup>           | 0.40       | 6        | 1        | 0.13×10 <sup>-1</sup>            | 0.65       |
| 6           | 2        | 0.25×10 <sup>0</sup>             | 6.81       | 6        | 2        | -0.22×10 <sup>0</sup>            | 11.28      |
| 6           | 3        | 0.67×10 <sup>-2</sup>            | 0.18       | 6        | 3        | 0.42×10 <sup>-2</sup>            | 0.21       |
| 6           | 4        | 0.33×10 <sup>-1</sup>            | 0.90       | 6        | 4        | -0.14×10 <sup>-2</sup>           | 0.07       |
| 6           | 5        | -0.57×10 <sup>-2</sup>           | 0.15       | 6        | 5        | 0.11×10 <sup>-2</sup>            | 0.05       |
| 6           | 6        | 0.62×10 <sup>-1</sup>            | 1.68       | 6        | 6        | -0.13×10 <sup>-2</sup>           | 0.06       |
| 2a          |          |                                  |            | 2a*      |          |                                  |            |
| <i>k</i>    | <i>q</i> | <i>B</i> ( <i>k</i> , <i>q</i> ) | Weight (%) | <i>k</i> | <i>q</i> | <i>B</i> ( <i>k</i> , <i>q</i> ) | Weight (%) |
| 2           | -2       | -0.27×10 <sup>2</sup>            | 4.51       | 2        | -2       | -0.22×10 <sup>2</sup>            | 4.14       |
| 2           | -1       | 0.13×10 <sup>1</sup>             | 0.22       | 2        | -1       | -0.43×10 <sup>1</sup>            | 0.80       |
| 2           | 0        | -0.13×10 <sup>3</sup>            | 22.88      | 2        | 0        | -0.67×10 <sup>2</sup>            | 12.60      |
| 2           | 1        | -0.23×10 <sup>0</sup>            | 0.03       | 2        | 1        | 0.24×10 <sup>2</sup>             | 4.50       |
| 2           | 2        | -0.89×10 <sup>2</sup>            | 14.76      | 2        | 2        | -0.43×10 <sup>2</sup>            | 8.09       |
| 4           | -4       | -0.16×10 <sup>0</sup>            | 0.72       | 4        | -4       | 0.30×10 <sup>0</sup>             | 1.53       |
| 4           | -3       | 0.21×10 <sup>-2</sup>            | 0.01       | 4        | -3       | -0.77×10 <sup>0</sup>            | 3.91       |
| 4           | -2       | -0.14×10 <sup>1</sup>            | 6.49       | 4        | -2       | 0.73×10 <sup>0</sup>             | 3.72       |
| 4           | -1       | -0.59×10 <sup>0</sup>            | 2.66       | 4        | -1       | -0.28×10 <sup>0</sup>            | 1.42       |
| 4           | 0        | 0.70×10 <sup>0</sup>             | 3.15       | 4        | 0        | 0.46×10 <sup>1</sup>             | 23.58      |



|           |          |                                  |            |            |          |                                  |            |
|-----------|----------|----------------------------------|------------|------------|----------|----------------------------------|------------|
| 4         | 1        | $0.84 \times 10^{-1}$            | 0.37       | 4          | 1        | $-0.97 \times 10^{-1}$           | 0.49       |
| 4         | 2        | $-0.46 \times 10^1$              | 20.77      | 4          | 2        | $0.12 \times 10^1$               | 6.23       |
| 4         | 3        | $-0.27 \times 10^{-2}$           | 0.01       | 4          | 3        | $-0.30 \times 10^0$              | 1.51       |
| 4         | 4        | $-0.25 \times 10^0$              | 1.15       | 4          | 4        | $0.25 \times 10^0$               | 1.28       |
| 6         | -6       | $0.23 \times 10^{-1}$            | 0.78       | 6          | -6       | $-0.47 \times 10^{-2}$           | 0.17       |
| 6         | -5       | $-0.14 \times 10^{-2}$           | 0.04       | 6          | -5       | $-0.61 \times 10^{-2}$           | 0.22       |
| 6         | -4       | $-0.15 \times 10^{-1}$           | 0.51       | 6          | -4       | $-0.45 \times 10^{-1}$           | 1.67       |
| 6         | -3       | $-0.51 \times 10^{-2}$           | 0.16       | 6          | -3       | $0.22 \times 10^{-1}$            | 0.83       |
| 6         | -2       | $-0.70 \times 10^{-1}$           | 2.31       | 6          | -2       | $-0.87 \times 10^{-1}$           | 3.24       |
| 6         | -1       | $-0.65 \times 10^{-1}$           | 2.14       | 6          | -1       | $-0.24 \times 10^{-1}$           | 0.89       |
| 6         | 0        | $-0.20 \times 10^0$              | 6.62       | 6          | 0        | $0.20 \times 10^{-1}$            | 0.76       |
| 6         | 1        | $0.93 \times 10^{-2}$            | 0.30       | 6          | 1        | $-0.34 \times 10^{-1}$           | 1.26       |
| 6         | 2        | $-0.23 \times 10^0$              | 7.67       | 6          | 2        | $-0.28 \times 10^0$              | 10.71      |
| 6         | 3        | $0.22 \times 10^{-2}$            | 0.07       | 6          | 3        | $0.76 \times 10^{-1}$            | 2.82       |
| 6         | 4        | $-0.24 \times 10^{-1}$           | 0.81       | 6          | 4        | $-0.35 \times 10^{-1}$           | 1.32       |
| 6         | 5        | $0.12 \times 10^{-2}$            | 0.04       | 6          | 5        | $-0.14 \times 10^{-1}$           | 0.54       |
| 6         | 6        | $0.20 \times 10^{-1}$            | 0.67       | 6          | 6        | $0.44 \times 10^{-1}$            | 1.65       |
| <b>2b</b> |          |                                  |            | <b>2b*</b> |          |                                  |            |
| <i>k</i>  | <i>q</i> | <i>B</i> ( <i>k</i> , <i>q</i> ) | Weight (%) | <i>k</i>   | <i>q</i> | <i>B</i> ( <i>k</i> , <i>q</i> ) | Weight (%) |
| 2         | -2       | $0.27 \times 10^2$               | 5.41       | 2          | -2       | $-0.54 \times 10^2$              | 10.55      |
| 2         | -1       | $-0.69 \times 10^0$              | 0.13       | 2          | -1       | $0.22 \times 10^1$               | 0.43       |
| 2         | 0        | $-0.92 \times 10^2$              | 18.21      | 2          | 0        | $-0.87 \times 10^2$              | 16.93      |
| 2         | 1        | $-0.36 \times 10^0$              | 0.07       | 2          | 1        | $0.40 \times 10^{-1}$            | 0.01       |
| 2         | 2        | $0.54 \times 10^2$               | 10.73      | 2          | 2        | $0.32 \times 10^2$               | 6.34       |
| 4         | -4       | $-0.55 \times 10^{-1}$           | 0.29       | 4          | -4       | $0.91 \times 10^{-2}$            | 0.04       |
| 4         | -3       | $-0.51 \times 10^{-1}$           | 0.27       | 4          | -3       | $0.10 \times 10^{-1}$            | 0.05       |
| 4         | -2       | $0.22 \times 10^1$               | 11.98      | 4          | -2       | $-0.42 \times 10^1$              | 22.36      |
| 4         | -1       | $-0.73 \times 10^0$              | 3.90       | 4          | -1       | $0.59 \times 10^0$               | 3.12       |
| 4         | 0        | $0.65 \times 10^0$               | 3.47       | 4          | 0        | $0.50 \times 10^0$               | 2.65       |
| 4         | 1        | $0.14 \times 10^0$               | 0.78       | 4          | 1        | $0.35 \times 10^0$               | 1.83       |
| 4         | 2        | $0.41 \times 10^1$               | 22.15      | 4          | 2        | $0.22 \times 10^1$               | 11.75      |
| 4         | 3        | $0.50 \times 10^{-1}$            | 0.26       | 4          | 3        | $-0.23 \times 10^{-1}$           | 0.12       |
| 4         | 4        | $-0.22 \times 10^{-1}$           | 0.12       | 4          | 4        | $0.13 \times 10^{-1}$            | 0.07       |
| 6         | -6       | $0.12 \times 10^{-3}$            | 0.00       | 6          | -6       | $0.73 \times 10^{-3}$            | 0.02       |
| 6         | -5       | $0.25 \times 10^{-4}$            | 0.00       | 6          | -5       | $-0.20 \times 10^{-3}$           | 0.01       |
| 6         | -4       | $-0.54 \times 10^{-2}$           | 0.21       | 6          | -4       | $0.21 \times 10^{-2}$            | 0.08       |
| 6         | -3       | $-0.34 \times 10^{-2}$           | 0.13       | 6          | -3       | $-0.85 \times 10^{-3}$           | 0.03       |
| 6         | -2       | $0.11 \times 10^0$               | 4.39       | 6          | -2       | $-0.21 \times 10^0$              | 8.25       |
| 6         | -1       | $-0.53 \times 10^{-2}$           | 0.20       | 6          | -1       | $0.96 \times 10^{-2}$            | 0.37       |
| 6         | 0        | $-0.23 \times 10^0$              | 9.02       | 6          | 0        | $-0.27 \times 10^0$              | 10.74      |
| 6         | 1        | $-0.38 \times 10^{-2}$           | 0.15       | 6          | 1        | $-0.23 \times 10^{-2}$           | 0.09       |
| 6         | 2        | $0.19 \times 10^0$               | 7.79       | 6          | 2        | $0.10 \times 10^0$               | 3.84       |
| 6         | 3        | $0.33 \times 10^{-2}$            | 0.13       | 6          | 3        | $0.95 \times 10^{-3}$            | 0.03       |

|          |          |                                  |            |           |          |                                  |            |
|----------|----------|----------------------------------|------------|-----------|----------|----------------------------------|------------|
| 6        | 4        | -0.23×10 <sup>-2</sup>           | 0.09       | 6         | 4        | 0.39×10 <sup>-2</sup>            | 0.15       |
| 6        | 5        | -0.37×10 <sup>-3</sup>           | 0.01       | 6         | 5        | 0.94×10 <sup>-5</sup>            | 0.00       |
| 6        | 6        | -0.52×10 <sup>-4</sup>           | 0.00       | 6         | 6        | -0.11×10 <sup>-2</sup>           | 0.04       |
| <b>3</b> |          |                                  |            | <b>3*</b> |          |                                  |            |
| <i>k</i> | <i>q</i> | <i>B</i> ( <i>k</i> , <i>q</i> ) | Weight (%) | <i>k</i>  | <i>q</i> | <i>B</i> ( <i>k</i> , <i>q</i> ) | Weight (%) |
| 2        | -2       | 0.11×10 <sup>2</sup>             | 2.11       | 2         | -2       | 0.19×10 <sup>2</sup>             | 3.51       |
| 2        | -1       | -0.63×10 <sup>0</sup>            | 0.11       | 2         | -1       | 0.95×10 <sup>1</sup>             | 1.72       |
| 2        | 0        | -0.82×10 <sup>2</sup>            | 14.64      | 2         | 0        | -0.85×10 <sup>2</sup>            | 15.56      |
| 2        | 1        | -0.10×10 <sup>2</sup>            | 1.84       | 2         | 1        | 0.96×10 <sup>1</sup>             | 1.73       |
| 2        | 2        | 0.78×10 <sup>2</sup>             | 14.03      | 2         | 2        | 0.72×10 <sup>2</sup>             | 13.09      |
| 4        | -4       | -0.10×10 <sup>-1</sup>           | 0.05       | 4         | -4       | -0.12×10 <sup>-2</sup>           | 0.00       |
| 4        | -3       | -0.77×10 <sup>-1</sup>           | 0.37       | 4         | -3       | 0.21×10 <sup>0</sup>             | 1.06       |
| 4        | -2       | 0.89×10 <sup>0</sup>             | 4.29       | 4         | -2       | 0.11×10 <sup>1</sup>             | 5.73       |
| 4        | -1       | -0.29×10 <sup>-1</sup>           | 0.14       | 4         | -1       | -0.48×10 <sup>0</sup>            | 2.38       |
| 4        | 0        | 0.37×10 <sup>0</sup>             | 1.81       | 4         | 0        | -0.65×10 <sup>-1</sup>           | 0.32       |
| 4        | 1        | -0.72×10 <sup>0</sup>            | 3.47       | 4         | 1        | -0.46×10 <sup>0</sup>            | 2.26       |
| 4        | 2        | 0.56×10 <sup>1</sup>             | 27.10      | 4         | 2        | 0.53×10 <sup>1</sup>             | 26.45      |
| 4        | 3        | -0.24×10 <sup>0</sup>            | 1.17       | 4         | 3        | -0.19×10 <sup>0</sup>            | 0.94       |
| 4        | 4        | -0.23×10 <sup>-1</sup>           | 0.11       | 4         | 4        | 0.41×10 <sup>-1</sup>            | 0.20       |
| 6        | -6       | 0.65×10 <sup>-3</sup>            | 0.02       | 6         | -6       | -0.24×10 <sup>-4</sup>           | 0.00       |
| 6        | -5       | 0.11×10 <sup>-2</sup>            | 0.03       | 6         | -5       | 0.16×10 <sup>-2</sup>            | 0.05       |
| 6        | -4       | -0.11×10 <sup>-2</sup>           | 0.04       | 6         | -4       | 0.11×10 <sup>-3</sup>            | 0.00       |
| 6        | -3       | 0.60×10 <sup>-3</sup>            | 0.02       | 6         | -3       | 0.17×10 <sup>-2</sup>            | 0.06       |
| 6        | -2       | 0.46×10 <sup>-1</sup>            | 1.64       | 6         | -2       | 0.25×10 <sup>0</sup>             | 9.05       |
| 6        | -1       | -0.14×10 <sup>-1</sup>           | 0.51       | 6         | -1       | 0.44×10 <sup>-1</sup>            | 1.60       |
| 6        | 0        | -0.33×10 <sup>0</sup>            | 11.85      | 6         | 0        | -0.30×10 <sup>0</sup>            | 10.99      |
| 6        | 1        | -0.13×10 <sup>0</sup>            | 4.72       | 6         | 1        | 0.28×10 <sup>-1</sup>            | 1.02       |
| 6        | 2        | 0.27×10 <sup>0</sup>             | 9.62       | 6         | 2        | 0.46×10 <sup>-1</sup>            | 1.66       |
| 6        | 3        | -0.90×10 <sup>-3</sup>           | 0.03       | 6         | 3        | 0.44×10 <sup>-2</sup>            | 0.16       |
| 6        | 4        | -0.25×10 <sup>-2</sup>           | 0.08       | 6         | 4        | 0.76×10 <sup>-2</sup>            | 0.27       |
| 6        | 5        | 0.19×10 <sup>-2</sup>            | 0.06       | 6         | 5        | 0.18×10 <sup>-2</sup>            | 0.06       |
| 6        | 6        | 0.10×10 <sup>-2</sup>            | 0.03       | 6         | 6        | -0.62×10 <sup>-5</sup>           | 0.00       |

**Table S11.** Calculated energy levels (cm<sup>-1</sup>), **g** (*g<sub>x</sub>*, *g<sub>y</sub>*, *g<sub>z</sub>*) tensors and predominant *m<sub>J</sub>* values of the original and simplified structures of **1** (**1\***), **2a** (**2a\***), **2b** (**2b\***) and **3** (**3\***) by CAS (11, 9) using CASSCF/SINGLE\_ANISO with ORCA 5.0.3.

| CAS (11, 9) |                            |                          |                      |                            |                          |                      |
|-------------|----------------------------|--------------------------|----------------------|----------------------------|--------------------------|----------------------|
| KDs         | <b>1</b>                   |                          |                      | <b>1*</b>                  |                          |                      |
|             | <i>E</i> /cm <sup>-1</sup> | <b>g</b>                 | <i>m<sub>J</sub></i> | <i>E</i> /cm <sup>-1</sup> | <b>g</b>                 | <i>m<sub>J</sub></i> |
| 0           | 0.0                        | 0.000<br>0.000<br>10.603 | ±9/2                 | 0.0                        | 0.000<br>0.000<br>10.763 | ±9/2                 |
| 1           | 267.3                      | 0.752                    | ±7/2                 | 262.1                      | 0.197                    | ±7/2                 |

|     |                    |                          |           |                    |                          |           |
|-----|--------------------|--------------------------|-----------|--------------------|--------------------------|-----------|
|     |                    | 0.752<br>6.806           |           |                    | 0.197<br>6.002           |           |
| 2   | 578.8              | 0.597<br>0.606<br>2.640  | $\pm 5/2$ | 554.6              | 0.149<br>0.153<br>2.007  | $\pm 5/2$ |
| 3   | 1053.3             | 0.004<br>0.006<br>1.069  | $\pm 1/2$ | 1091.2             | 0.011<br>0.015<br>0.641  | $\pm 1/2$ |
| 4   | 2188.4             | 6.343<br>6.280<br>1.406  | $\pm 3/2$ | 2219.3             | 6.496<br>6.384<br>1.584  | $\pm 3/2$ |
| KDs | <b>2a</b>          |                          |           | <b>2a*</b>         |                          |           |
|     | $E/\text{cm}^{-1}$ | <b>g</b>                 | $m_J$     | $E/\text{cm}^{-1}$ | <b>g</b>                 | $m_J$     |
| 0   | 0.0                | 0.000<br>0.000<br>10.982 | $\pm 9/2$ | 0.0                | 0.000<br>0.000<br>10.909 | $\pm 9/2$ |
| 1   | 349.1              | 0.006<br>0.006<br>6.053  | $\pm 7/2$ | 343.2              | 0.706<br>0.706<br>6.825  | $\pm 7/2$ |
| 2   | 817.1              | 0.005<br>0.008<br>3.137  | $\pm 5/2$ | 803.1              | 0.557<br>0.568<br>3.671  | $\pm 5/2$ |
| 3   | 1006.9             | 0.010<br>0.011<br>0.501  | $\pm 1/2$ | 1159.7             | 0.002<br>0.004<br>1.040  | $\pm 1/2$ |
| 4   | 2053.1             | 6.515<br>6.480<br>1.659  | $\pm 3/2$ | 2235.9             | 6.340<br>6.301<br>1.419  | $\pm 3/2$ |
| KDs | <b>2b</b>          |                          |           | <b>2b*</b>         |                          |           |
|     | $E/\text{cm}^{-1}$ | <b>g</b>                 | $m_J$     | $E/\text{cm}^{-1}$ | <b>g</b>                 | $m_J$     |
| 0   | 0.0                | 0.000<br>0.000<br>10.764 | $\pm 9/2$ | 0.0                | 0.000<br>0.000<br>10.897 | $\pm 9/2$ |
| 1   | 385.4              | 0.945<br>0.945<br>6.892  | $\pm 5/2$ | 361.2              | 0.728<br>0.728<br>6.850  | $\pm 5/2$ |
| 2   | 809.0              | 0.891<br>0.905<br>3.984  | $\pm 3/2$ | 881.5              | 0.627<br>0.637<br>3.784  | $\pm 3/2$ |
| 3   | 1260.1             | 0.001<br>0.003<br>0.738  | $\pm 1/2$ | 1345.5             | 0.002<br>0.004<br>0.725  | $\pm 1/2$ |
| 4   | 2528.0             | 0.655<br>0.656           | $\pm 7/2$ | 2736.9             | 6.359<br>6.261           | $\pm 7/2$ |

|     |                    | 9.515                    |           |                    | 1.278                    |           |
|-----|--------------------|--------------------------|-----------|--------------------|--------------------------|-----------|
| KDs | <b>3</b>           |                          |           | <b>3*</b>          |                          |           |
|     | $E/\text{cm}^{-1}$ | $g$                      | $m_J$     | $E/\text{cm}^{-1}$ | $g$                      | $m_J$     |
| 0   | 0.0                | 0.006<br>0.006<br>10.659 | $\pm 9/2$ | 0.0                | 0.003<br>0.004<br>10.602 | $\pm 9/2$ |
| 1   | 377.4              | 0.178<br>0.185<br>6.630  | $\pm 5/2$ | 373.1              | 0.192<br>0.196<br>6.564  | $\pm 5/2$ |
| 2   | 758.9              | 0.116<br>0.493<br>2.596  | $\pm 3/2$ | 750.4              | 0.148<br>0.512<br>2.528  | $\pm 3/2$ |
| 3   | 1153.2             | 0.219<br>0.233<br>1.445  | $\pm 1/2$ | 1141.2             | 0.239<br>0.251<br>1.509  | $\pm 1/2$ |
| 4   | 2684.4             | 0.035<br>0.058<br>9.939  | $\pm 7/2$ | 3024.8             | 0.040<br>0.059<br>10.162 | $\pm 7/2$ |

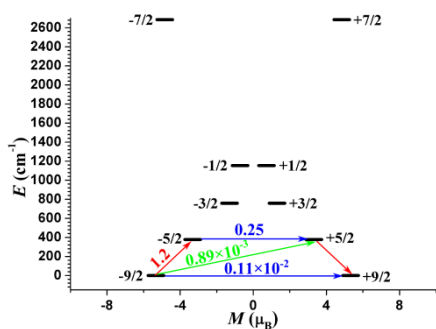

1\_CAS (11, 9) \_267.3  $\text{cm}^{-1}$

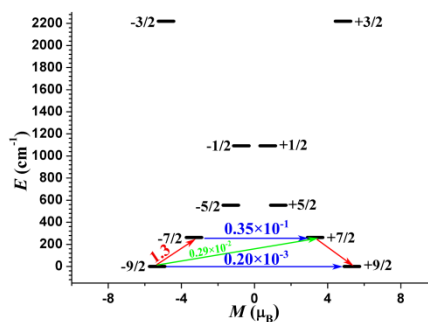

1\*\_CAS (11, 9) \_262.1  $\text{cm}^{-1}$

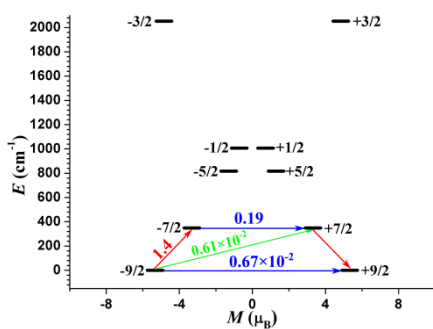

2a\_CAS (11, 9) \_349.1  $\text{cm}^{-1}$

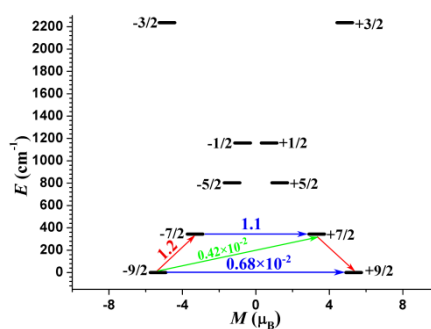

2a\*\_CAS (11, 9) \_343.2  $\text{cm}^{-1}$

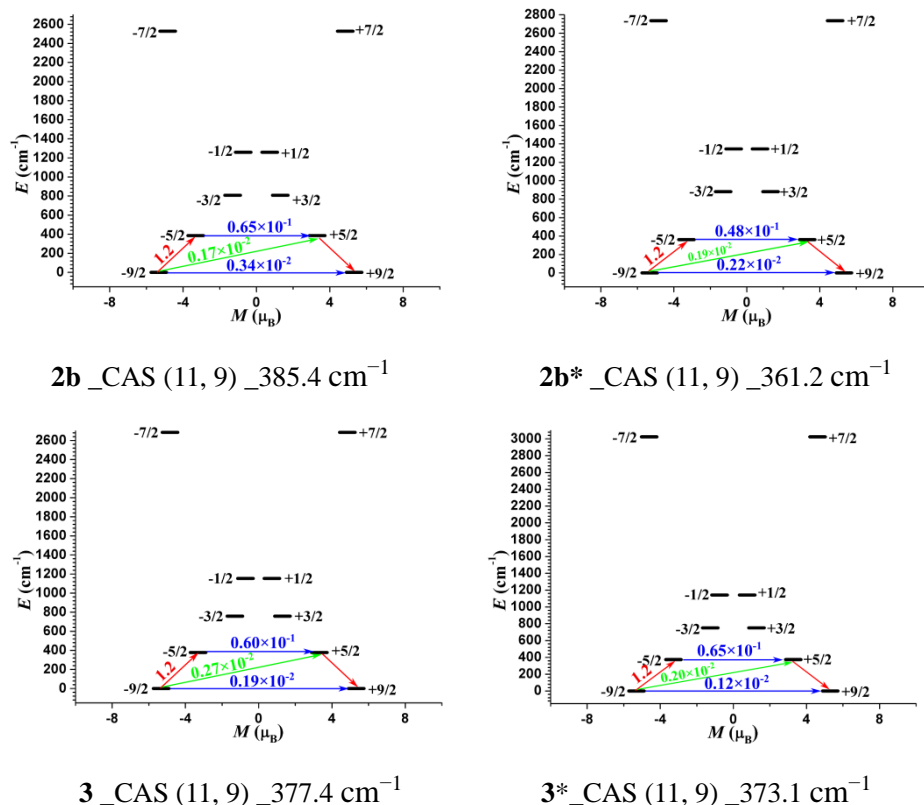

**Figure S4.** Magnetization blocking barriers for **1** (**1\***), **2a** (**2a\***), **2b** (**2b\***) and **3** (**3\***) by CAS (11, 9). The thick black lines represent the KDs of the  $\text{Co}^{\text{II}}$  ion as a function of their magnetic moment along the magnetic axis. The blue lines correspond to diagonal matrix element of the transversal magnetic moment; the green lines represent Orbach relaxation processes. The path shown by the red arrows represent the most probable path for magnetic relaxation in the corresponding compounds. The numbers at each arrow stand for the mean absolute value of the corresponding matrix element of transition magnetic moment.

**Table S12.** Calculated Mulliken spin density on  $\text{Co}^{\text{II}}$  at the spin state  $S = 3/2$  for **1** (**1\***), **2a** (**2a\***), **2b** (**2b\***) and **3** (**3\***) by CAS (11, 9) using CASSCF/SINGLE\_ANISO with ORCA 5.0.3.

|                         | <b>1</b> | <b>1*</b> | <b>2a</b> | <b>2a*</b> | <b>2b</b> | <b>2b*</b> | <b>3</b> | <b>3*</b> |
|-------------------------|----------|-----------|-----------|------------|-----------|------------|----------|-----------|
| $\text{Co}^{\text{II}}$ | 2.0148   | 2.0141    | 2.0184    | 2.0116     | 2.0245    | 2.0197     | 2.0270   | 2.0219    |

**Table S13.** Calculated crystal field parameters  $B(k, q)$  and the corresponding weights of **1** (**1\***), **2a** (**2a\***), **2b** (**2b\***) and **3** (**3\***) by CAS (11, 9) using CASSCF/SINGLE\_ANISO with ORCA 5.0.3.

| CAS (11, 9) |     |                        |            |           |     |                        |            |
|-------------|-----|------------------------|------------|-----------|-----|------------------------|------------|
| <b>1</b>    |     |                        |            | <b>1*</b> |     |                        |            |
| $k$         | $q$ | $B(k, q)$              | Weight (%) | $k$       | $q$ | $B(k, q)$              | Weight (%) |
| 2           | -2  | $0.35 \times 10^{-3}$  | 0.00       | 2         | -2  | $-0.10 \times 10^{-1}$ | 0.00       |
| 2           | -1  | $-0.37 \times 10^{-3}$ | 0.00       | 2         | -1  | $-0.15 \times 10^2$    | 2.51       |
| 2           | 0   | $-0.10 \times 10^3$    | 13.32      | 2         | 0   | $-0.98 \times 10^2$    | 15.79      |
| 2           | 1   | $-0.13 \times 10^2$    | 1.72       | 2         | 1   | $-0.34 \times 10^{-3}$ | 0.00       |
| 2           | 2   | $0.13 \times 10^3$     | 16.50      | 2         | 2   | $-0.10 \times 10^3$    | 16.51      |
| 4           | -4  | $0.40 \times 10^{-4}$  | 0.00       | 4         | -4  | $-0.21 \times 10^{-4}$ | 0.00       |

|           |          |                                  |            |            |          |                                  |            |
|-----------|----------|----------------------------------|------------|------------|----------|----------------------------------|------------|
| 4         | -3       | $-0.14 \times 10^{-3}$           | 0.00       | 4          | -3       | $0.35 \times 10^0$               | 1.55       |
| 4         | -2       | $0.12 \times 10^{-4}$            | 0.00       | 4          | -2       | $-0.83 \times 10^3$              | 0.00       |
| 4         | -1       | $-0.12 \times 10^{-4}$           | 0.00       | 4          | -1       | $0.14 \times 10^1$               | 6.50       |
| 4         | 0        | $0.42 \times 10^1$               | 14.58      | 4          | 0        | $0.18 \times 10^1$               | 7.86       |
| 4         | 1        | $0.27 \times 10^1$               | 9.27       | 4          | 1        | $0.14 \times 10^{-3}$            | 0.00       |
| 4         | 2        | $0.81 \times 10^1$               | 27.78      | 4          | 2        | $-0.69 \times 10^1$              | 30.08      |
| 4         | 3        | $-0.42 \times 10^0$              | 1.45       | 4          | 3        | $-0.49 \times 10^{-4}$           | 0.00       |
| 4         | 4        | $-0.57 \times 10^{-1}$           | 0.19       | 4          | 4        | $-0.38 \times 10^{-1}$           | 0.16       |
| 6         | -6       | $0.96 \times 10^{-6}$            | 0.00       | 6          | -6       | $0.40 \times 10^{-5}$            | 0.00       |
| 6         | -5       | $0.33 \times 10^{-5}$            | 0.00       | 6          | -5       | $0.25 \times 10^{-2}$            | 0.08       |
| 6         | -4       | $0.10 \times 10^{-6}$            | 0.00       | 6          | -4       | $-0.73 \times 10^{-5}$           | 0.00       |
| 6         | -3       | $0.37 \times 10^{-5}$            | 0.00       | 6          | -3       | $0.14 \times 10^{-2}$            | 0.04       |
| 6         | -2       | $0.16 \times 10^{-4}$            | 0.00       | 6          | -2       | $-0.46 \times 10^{-4}$           | 0.00       |
| 6         | -1       | $0.51 \times 10^{-4}$            | 0.00       | 6          | -1       | $0.17 \times 10^{-1}$            | 0.55       |
| 6         | 0        | $-0.11 \times 10^0$              | 2.79       | 6          | 0        | $-0.26 \times 10^0$              | 8.48       |
| 6         | 1        | $0.14 \times 10^0$               | 3.74       | 6          | 1        | $-0.13 \times 10^{-4}$           | 0.00       |
| 6         | 2        | $0.31 \times 10^0$               | 8.03       | 6          | 2        | $-0.29 \times 10^0$              | 9.48       |
| 6         | 3        | $-0.59 \times 10^{-2}$           | 0.15       | 6          | 3        | $0.77 \times 10^{-5}$            | 0.00       |
| 6         | 4        | $-0.11 \times 10^{-1}$           | 0.28       | 6          | 4        | $-0.91 \times 10^{-2}$           | 0.29       |
| 6         | 5        | $0.20 \times 10^{-2}$            | 0.05       | 6          | 5        | $-0.34 \times 10^{-5}$           | 0.00       |
| 6         | 6        | $-0.36 \times 10^{-2}$           | 0.09       | 6          | 6        | $0.12 \times 10^{-2}$            | 0.03       |
| <b>2a</b> |          |                                  |            | <b>2a*</b> |          |                                  |            |
| <i>k</i>  | <i>q</i> | <i>B</i> ( <i>k</i> , <i>q</i> ) | Weight (%) | <i>k</i>   | <i>q</i> | <i>B</i> ( <i>k</i> , <i>q</i> ) | Weight (%) |
| 2         | -2       | $0.42 \times 10^2$               | 8.10       | 2          | -2       | $0.34 \times 10^2$               | 5.64       |
| 2         | -1       | $-0.21 \times 10^2$              | 4.05       | 2          | -1       | $0.75 \times 10^1$               | 1.24       |
| 2         | 0        | $-0.87 \times 10^2$              | 16.86      | 2          | 0        | $-0.88 \times 10^2$              | 14.45      |
| 2         | 1        | $-0.28 \times 10^2$              | 5.42       | 2          | 1        | $0.26 \times 10^2$               | 4.28       |
| 2         | 2        | $0.14 \times 10^2$               | 2.73       | 2          | 2        | $0.54 \times 10^2$               | 9.01       |
| 4         | -4       | $-0.16 \times 10^{-1}$           | 0.08       | 4          | -4       | $-0.38 \times 10^{-1}$           | 0.16       |
| 4         | -3       | $-0.46 \times 10^0$              | 2.41       | 4          | -3       | $0.40 \times 10^0$               | 1.78       |
| 4         | -2       | $0.33 \times 10^1$               | 17.26      | 4          | -2       | $0.27 \times 10^1$               | 12.11      |
| 4         | -1       | $0.12 \times 10^0$               | 0.64       | 4          | -1       | $0.90 \times 10^{-1}$            | 0.40       |
| 4         | 0        | $0.17 \times 10^1$               | 9.26       | 4          | 0        | $0.52 \times 10^0$               | 2.33       |
| 4         | 1        | $-0.35 \times 10^{-1}$           | 0.18       | 4          | 1        | $0.55 \times 10^0$               | 2.45       |
| 4         | 2        | $0.99 \times 10^0$               | 5.15       | 4          | 2        | $0.40 \times 10^1$               | 18.16      |
| 4         | 3        | $0.27 \times 10^0$               | 1.42       | 4          | 3        | $0.24 \times 10^0$               | 1.09       |
| 4         | 4        | $0.51 \times 10^{-1}$            | 0.26       | 4          | 4        | $-0.77 \times 10^{-2}$           | 0.03       |
| 6         | -6       | $-0.60 \times 10^{-4}$           | 0.00       | 6          | -6       | $-0.17 \times 10^{-3}$           | 0.01       |
| 6         | -5       | $0.85 \times 10^{-3}$            | 0.03       | 6          | -5       | $-0.11 \times 10^{-2}$           | 0.03       |
| 6         | -4       | $-0.13 \times 10^{-2}$           | 0.05       | 6          | -4       | $-0.78 \times 10^{-2}$           | 0.25       |
| 6         | -3       | $0.21 \times 10^{-1}$            | 0.82       | 6          | -3       | $-0.12 \times 10^{-1}$           | 0.41       |
| 6         | -2       | $0.19 \times 10^0$               | 7.49       | 6          | -2       | $0.13 \times 10^1$               | 4.36       |
| 6         | -1       | $-0.12 \times 10^0$              | 4.74       | 6          | -1       | $0.65 \times 10^{-1}$            | 2.15       |

|           |          |                                  |            |            |          |                                  |            |
|-----------|----------|----------------------------------|------------|------------|----------|----------------------------------|------------|
| 6         | 0        | $-0.13 \times 10^0$              | 5.08       | 6          | 0        | $-0.23 \times 10^0$              | 7.67       |
| 6         | 1        | $-0.13 \times 10^0$              | 5.07       | 6          | 1        | $0.16 \times 10^0$               | 5.47       |
| 6         | 2        | $0.46 \times 10^{-1}$            | 1.76       | 6          | 2        | $0.19 \times 10^0$               | 6.27       |
| 6         | 3        | $-0.21 \times 10^{-1}$           | 0.81       | 6          | 3        | $-0.25 \times 10^{-2}$           | 0.08       |
| 6         | 4        | $0.35 \times 10^{-2}$            | 0.13       | 6          | 4        | $-0.13 \times 10^{-2}$           | 0.04       |
| 6         | 5        | $0.23 \times 10^{-2}$            | 0.08       | 6          | 5        | $0.15 \times 10^{-3}$            | 0.01       |
| 6         | 6        | $-0.42 \times 10^{-4}$           | 0.00       | 6          | 6        | $0.72 \times 10^{-4}$            | 0.00       |
| <b>2b</b> |          |                                  |            | <b>2b*</b> |          |                                  |            |
| <i>k</i>  | <i>q</i> | <i>B</i> ( <i>k</i> , <i>q</i> ) | Weight (%) | <i>k</i>   | <i>q</i> | <i>B</i> ( <i>k</i> , <i>q</i> ) | Weight (%) |
| 2         | -2       | $-0.44 \times 10^2$              | 7.27       | 2          | -2       | $0.28 \times 10^1$               | 1.34       |
| 2         | -1       | $-0.11 \times 10^2$              | 1.80       | 2          | -1       | $0.18 \times 10^1$               | 0.86       |
| 2         | 0        | $-0.88 \times 10^2$              | 14.32      | 2          | 0        | $-0.29 \times 10^2$              | 13.92      |
| 2         | 1        | $0.26 \times 10^2$               | 4.28       | 2          | 1        | $-0.27 \times 10^1$              | 1.27       |
| 2         | 2        | $0.43 \times 10^2$               | 7.09       | 2          | 2        | $-0.15 \times 10^1$              | 0.72       |
| 4         | -4       | $0.37 \times 10^{-1}$            | 0.16       | 4          | -4       | $-0.20 \times 10^0$              | 2.65       |
| 4         | -3       | $-0.48 \times 10^0$              | 2.12       | 4          | -3       | $0.28 \times 10^0$               | 3.60       |
| 4         | -2       | $-0.35 \times 10^1$              | 15.51      | 4          | -2       | $0.26 \times 10^1$               | 33.20      |
| 4         | -1       | $-0.15 \times 10^0$              | 0.66       | 4          | -1       | $-0.61 \times 10^{-1}$           | 0.77       |
| 4         | 0        | $0.66 \times 10^0$               | 2.91       | 4          | 0        | $0.18 \times 10^0$               | 2.36       |
| 4         | 1        | $0.57 \times 10^0$               | 2.54       | 4          | 1        | $-0.10 \times 10^0$              | 1.35       |
| 4         | 2        | $0.32 \times 10^1$               | 14.06      | 4          | 2        | $-0.41 \times 10^{-1}$           | 0.52       |
| 4         | 3        | $0.70 \times 10^{-1}$            | 0.30       | 4          | 3        | $-0.42 \times 10^0$              | 5.37       |
| 4         | 4        | $0.13 \times 10^{-1}$            | 0.05       | 4          | 4        | $0.54 \times 10^{-1}$            | 0.69       |
| 6         | -6       | $0.67 \times 10^{-4}$            | 0.00       | 6          | -6       | $0.17 \times 10^{-2}$            | 0.16       |
| 6         | -5       | $0.55 \times 10^{-3}$            | 0.02       | 6          | -5       | $-0.23 \times 10^{-2}$           | 0.22       |
| 6         | -4       | $0.71 \times 10^{-2}$            | 0.23       | 6          | -4       | $0.26 \times 10^{-1}$            | 2.45       |
| 6         | -3       | $0.14 \times 10^{-1}$            | 0.48       | 6          | -3       | $0.18 \times 10^{-1}$            | 1.72       |
| 6         | -2       | $-0.17 \times 10^0$              | 5.62       | 6          | -2       | $0.81 \times 10^{-4}$            | 0.01       |
| 6         | -1       | $-0.92 \times 10^{-1}$           | 3.00       | 6          | -1       | $-0.10 \times 10^{-2}$           | 0.09       |
| 6         | 0        | $-0.22 \times 10^0$              | 7.14       | 6          | 0        | $-0.22 \times 10^0$              | 20.72      |
| 6         | 1        | $0.16 \times 10^0$               | 5.28       | 6          | 1        | $0.56 \times 10^{-2}$            | 0.52       |
| 6         | 2        | $0.14 \times 10^0$               | 4.83       | 6          | 2        | $0.49 \times 10^{-2}$            | 0.46       |
| 6         | 3        | $0.38 \times 10^{-2}$            | 0.12       | 6          | 3        | $-0.26 \times 10^{-1}$           | 2.49       |
| 6         | 4        | $0.28 \times 10^{-2}$            | 0.09       | 6          | 4        | $-0.23 \times 10^{-1}$           | 2.23       |
| 6         | 5        | $0.59 \times 10^{-3}$            | 0.02       | 6          | 5        | $0.11 \times 10^{-2}$            | 0.10       |
| 6         | 6        | $0.17 \times 10^{-3}$            | 0.01       | 6          | 6        | $-0.89 \times 10^{-3}$           | 0.08       |
| <b>3</b>  |          |                                  |            | <b>3*</b>  |          |                                  |            |
| <i>k</i>  | <i>q</i> | <i>B</i> ( <i>k</i> , <i>q</i> ) | Weight (%) | <i>k</i>   | <i>q</i> | <i>B</i> ( <i>k</i> , <i>q</i> ) | Weight (%) |
| 2         | -2       | $-0.21 \times 10^2$              | 3.49       | 2          | -2       | $0.76 \times 10^1$               | 1.38       |
| 2         | -1       | $0.97 \times 10^0$               | 0.15       | 2          | -1       | $-0.68 \times 10^0$              | 0.12       |
| 2         | 0        | $-0.81 \times 10^2$              | 13.09      | 2          | 0        | $-0.75 \times 10^2$              | 13.71      |
| 2         | 1        | $-0.90 \times 10^1$              | 1.44       | 2          | 1        | $-0.91 \times 10^1$              | 1.66       |
| 2         | 2        | $0.74 \times 10^2$               | 11.86      | 2          | 2        | $0.80 \times 10^2$               | 14.63      |

|   |    |                        |       |   |    |                        |       |
|---|----|------------------------|-------|---|----|------------------------|-------|
| 4 | -4 | $-0.25 \times 10^{-1}$ | 0.11  | 4 | -4 | $0.18 \times 10^{-1}$  | 0.09  |
| 4 | -3 | $0.16 \times 10^0$     | 0.69  | 4 | -3 | $-0.71 \times 10^{-1}$ | 0.35  |
| 4 | -2 | $-0.16 \times 10^1$    | 7.27  | 4 | -2 | $0.62 \times 10^0$     | 3.05  |
| 4 | -1 | $0.17 \times 10^0$     | 0.77  | 4 | -1 | $0.68 \times 10^{-1}$  | 0.33  |
| 4 | 0  | $0.77 \times 10^0$     | 3.33  | 4 | 0  | $0.20 \times 10^0$     | 1.01  |
| 4 | 1  | $-0.12 \times 10^1$    | 5.54  | 4 | 1  | $0.96 \times 10^0$     | 4.74  |
| 4 | 2  | $0.53 \times 10^1$     | 23.17 | 4 | 2  | $0.60 \times 10^1$     | 29.61 |
| 4 | 3  | $-0.24 \times 10^0$    | 1.06  | 4 | 3  | $-0.35 \times 10^0$    | 1.73  |
| 4 | 4  | $0.23 \times 10^{-1}$  | 0.09  | 4 | 4  | $0.59 \times 10^{-1}$  | 0.29  |
| 6 | -6 | $-0.30 \times 10^{-2}$ | 0.09  | 6 | -6 | $0.11 \times 10^{-2}$  | 0.04  |
| 6 | -5 | $-0.14 \times 10^{-3}$ | 0.00  | 6 | -5 | $0.77 \times 10^{-3}$  | 0.02  |
| 6 | -4 | $-0.43 \times 10^{-3}$ | 0.01  | 6 | -4 | $-0.18 \times 10^{-3}$ | 0.00  |
| 6 | -3 | $0.43 \times 10^{-3}$  | 0.01  | 6 | -3 | $0.99 \times 10^{-3}$  | 0.03  |
| 6 | -2 | $-0.89 \times 10^{-1}$ | 2.84  | 6 | -2 | $0.33 \times 10^{-1}$  | 1.22  |
| 6 | -1 | $0.32 \times 10^{-1}$  | 1.04  | 6 | -1 | $-0.37 \times 10^{-2}$ | 0.13  |
| 6 | 0  | $-0.32 \times 10^0$    | 10.30 | 6 | 0  | $-0.38 \times 10^0$    | 13.95 |
| 6 | 1  | $-0.15 \times 10^0$    | 5.04  | 6 | 1  | $-0.21 \times 10^{-1}$ | 0.78  |
| 6 | 2  | $0.26 \times 10^0$     | 8.30  | 6 | 2  | $0.29 \times 10^0$     | 10.79 |
| 6 | 3  | $-0.38 \times 10^{-2}$ | 0.12  | 6 | 3  | $-0.56 \times 10^{-3}$ | 0.02  |
| 6 | 4  | $0.47 \times 10^{-3}$  | 0.01  | 6 | 4  | $-0.55 \times 10^{-3}$ | 0.02  |
| 6 | 5  | $0.10 \times 10^{-3}$  | 0.00  | 6 | 5  | $0.21 \times 10^{-2}$  | 0.07  |
| 6 | 6  | $0.14 \times 10^{-2}$  | 0.04  | 6 | 6  | $0.28 \times 10^{-2}$  | 0.10  |

**Table S14.** Calculated energy barriers of  $\Delta$  ( $\text{cm}^{-1}$ ) and the corresponding error  $\sigma$  of **1** (**1\***) with four types of active space.

|                               | CAS (7, 5) |           | CAS (11, 7) |           | CAS (11, 8) |           | CAS (11, 9) |           | Exp.                                  |
|-------------------------------|------------|-----------|-------------|-----------|-------------|-----------|-------------|-----------|---------------------------------------|
|                               | <b>1</b>   | <b>1*</b> | <b>1</b>    | <b>1*</b> | <b>1</b>    | <b>1*</b> | <b>1</b>    | <b>1*</b> | $U_{\text{eff}}$ ( $\text{cm}^{-1}$ ) |
| $\Delta$ ( $\text{cm}^{-1}$ ) | 767.9      | 790.6     | 373.9       | 387.6     | 287.5       | 287.7     | 267.3       | 262.1     | 297                                   |
| $\sigma$                      | 1.586      | 1.662     | 0.259       | 0.305     | 0.032       | 0.031     | 0.100       | 0.118     | —                                     |

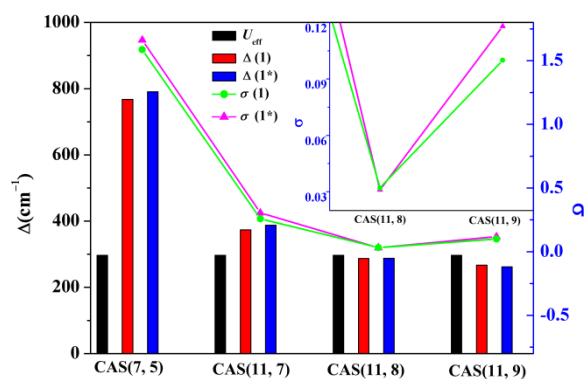



**Figure S5.** Column diagram: comparison of the calculated energy barrier  $\Delta$  (the black y axis) of **1** (**1\***) by four types of active spaces (CAS (7, 5), CAS (11, 7), CAS (11, 8) and CAS (11, 9)) with the experiment. Line chart: the error  $\sigma$  (the right blue y axis) between the calculated energy barrier  $\Delta$  (**1**, **1\***) by CAS (7, 5), CAS (11, 7), CAS (11, 8), CAS (11, 9) and the experiment. Insert: the enlarged drawing of the error  $\sigma$  in CAS (11, 8) and CAS (11, 9) for the sake of clearly (the left blue y axis).

**Table S15.** Calculated energy barriers of  $\Delta$  ( $\text{cm}^{-1}$ ) and the corresponding error  $\sigma$  of **2a** (**2a\***) with four types of active space.

|                               | CAS (7, 5) |            | CAS (11, 7) |            | CAS (11, 8) |            | CAS (11, 9) |            | Exp.                                  |
|-------------------------------|------------|------------|-------------|------------|-------------|------------|-------------|------------|---------------------------------------|
|                               | <b>2a</b>  | <b>2a*</b> | <b>2a</b>   | <b>2a*</b> | <b>2a</b>   | <b>2a*</b> | <b>2a</b>   | <b>2a*</b> | $U_{\text{eff}}$ ( $\text{cm}^{-1}$ ) |
| $\Delta$ ( $\text{cm}^{-1}$ ) | 682.2      | 759.2      | 390.6       | 388.3      | 312.0       | 291.8      | 349.1       | 343.2      | 288                                   |
| $\sigma$                      | 1.369      | 0.636      | 0.356       | 0.348      | 0.083       | 0.013      | 0.212       | 0.192      | —                                     |

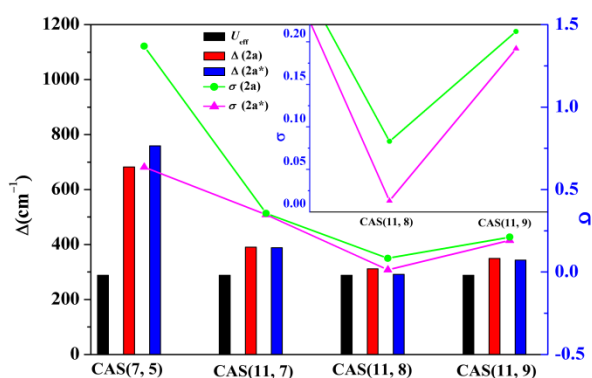

**Figure S6.** Column diagram: comparison of the calculated energy barrier  $\Delta$  (the black y axis) of **2a** (**2a\***) by four types of active spaces (CAS (7, 5), CAS (11, 7), CAS (11, 8) and CAS (11, 9)) with the experiment. Line chart: the error  $\sigma$  (the right blue y axis) between the calculated energy barrier  $\Delta$  (**2a**, **2a\***) by CAS (7, 5), CAS (11, 7), CAS (11, 8), CAS (11, 9) and the experiment. Insert: the enlarged drawing of the error  $\sigma$  in CAS (11, 8) and CAS (11, 9) for the sake of clearly (the left blue y axis).

**Table S16.** Calculated energy barriers of  $\Delta$  ( $\text{cm}^{-1}$ ) and the corresponding error  $\sigma$  of **2b** (**2b\***) with four types of active space.

|                               | CAS (7, 5) |            | CAS (11, 7) |            | CAS (11, 8) |            | CAS (11, 9) |            | Exp.                                  |
|-------------------------------|------------|------------|-------------|------------|-------------|------------|-------------|------------|---------------------------------------|
|                               | <b>2b</b>  | <b>2b*</b> | <b>2b</b>   | <b>2b*</b> | <b>2b</b>   | <b>2b*</b> | <b>2b</b>   | <b>2b*</b> | $U_{\text{eff}}$ ( $\text{cm}^{-1}$ ) |
| $\Delta$ ( $\text{cm}^{-1}$ ) | 699.7      | 764.9      | 387.9       | 386.4      | 333.9       | 291.0      | 385.4       | 361.2      | 288                                   |
| $\sigma$                      | 1.430      | 1.656      | 0.347       | 0.342      | 0.159       | 0.010      | 0.338       | 0.254      | —                                     |

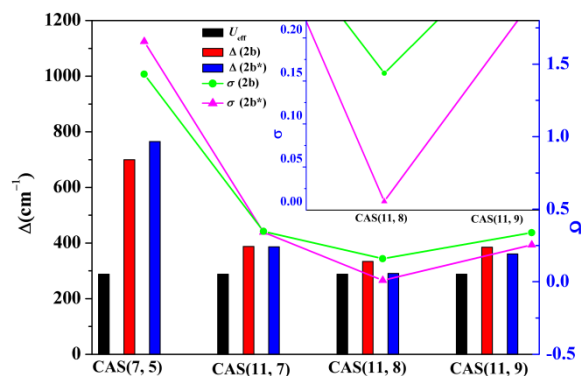

**Figure S7.** Column diagram: comparison of the calculated energy barrier  $\Delta$  (the black y axis) of **2b** (**2b\***) by four types of active spaces (CAS (7, 5), CAS (11, 7), CAS (11, 8) and CAS (11, 9)) with the experiment. Line chart: the error  $\sigma$  (the right blue y axis) between the calculated energy barrier  $\Delta$  (**2b**, **2b\***) by CAS (7, 5), CAS (11, 7), CAS (11, 8), CAS (11, 9) and the experiment. Insert: the enlarged drawing of the error  $\sigma$  in CAS (11, 8) and CAS (11, 9) for the sake of clearly (the left blue y axis).

**Table S17.** Calculated energy levels ( $\text{cm}^{-1}$ ),  $\mathbf{g}$  ( $g_x, g_y, g_z$ ) tensors and predominant  $m_J$  values in the lowest five KDs for **3\*** with  $\theta$  from  $171^\circ$  to  $180^\circ$  by CAS (11, 8) using CASSCF/SINGLE\_ANISO with ORCA 5.0.3.

| KDs | $171^\circ$        |                          |           | $172^\circ$        |                          |           | $173^\circ$        |                          |           |
|-----|--------------------|--------------------------|-----------|--------------------|--------------------------|-----------|--------------------|--------------------------|-----------|
|     | $E/\text{cm}^{-1}$ | $\mathbf{g}$             | $m_J$     | $E/\text{cm}^{-1}$ | $\mathbf{g}$             | $m_J$     | $E/\text{cm}^{-1}$ | $\mathbf{g}$             | $m_J$     |
| 0   | 0.0                | 0.009<br>0.010<br>10.807 | $\pm 9/2$ | 0.0                | 0.008<br>0.009<br>10.793 | $\pm 9/2$ | 0.0                | 0.007<br>0.008<br>10.780 | $\pm 9/2$ |
| 1   | 383.6              | 0.293<br>0.299<br>6.757  | $\pm 5/2$ | 383.5              | 0.251<br>0.257<br>6.745  | $\pm 5/2$ | 383.3              | 0.213<br>0.219<br>6.733  | $\pm 5/2$ |
| 2   | 776.0              | 0.010<br>0.636<br>2.707  | $\pm 3/2$ | 774.9              | 0.055<br>0.596<br>2.695  | $\pm 3/2$ | 773.7              | 0.096<br>0.558<br>2.684  | $\pm 3/2$ |
| 3   | 1182.4             | 0.219<br>0.239<br>1.347  | $\pm 1/2$ | 1180.3             | 0.222<br>0.240<br>1.359  | $\pm 1/2$ | 1178.3             | 0.223<br>0.240<br>1.370  | $\pm 1/2$ |
| 4   | 2633.5             | 0.033<br>0.071<br>9.825  | $\pm 7/2$ | 2711.7             | 0.012<br>0.032<br>9.892  | $\pm 7/2$ | 2779.3             | 0.002<br>0.006<br>9.978  | $\pm 7/2$ |
| KDs | $174^\circ$        |                          |           | $175^\circ$        |                          |           | $176^\circ$        |                          |           |
|     | $E/\text{cm}^{-1}$ | $\mathbf{g}$             | $m_J$     | $E/\text{cm}^{-1}$ | $\mathbf{g}$             | $m_J$     | $E/\text{cm}^{-1}$ | $\mathbf{g}$             | $m_J$     |
| 0   | 0.0                | 0.006<br>0.007<br>10.768 | $\pm 9/2$ | 0.0                | 0.006<br>0.006<br>10.757 | $\pm 9/2$ | 0.0                | 0.005<br>0.005<br>10.748 | $\pm 9/2$ |
| 1   | 383.0              | 0.179<br>0.184           | $\pm 5/2$ | 382.6              | 0.152<br>0.156           | $\pm 5/2$ | 382.5              | 0.131<br>0.136           | $\pm 5/2$ |

|     |                    |                          |           |                    |                          |           |                    |                          |           |
|-----|--------------------|--------------------------|-----------|--------------------|--------------------------|-----------|--------------------|--------------------------|-----------|
|     |                    | 6.722                    |           |                    | 6.713                    |           |                    | 6.703                    |           |
| 2   | 772.7              | 0.132<br>0.523<br>2.674  | $\pm 3/2$ | 771.8              | 0.160<br>0.495<br>2.665  | $\pm 3/2$ | 771.0              | 0.181<br>0.472<br>2.657  | $\pm 3/2$ |
| 3   | 1176.5             | 0.224<br>0.239<br>1.380  | $\pm 1/2$ | 1175.0             | 0.224<br>0.239<br>1.388  | $\pm 1/2$ | 1173.7             | 0.223<br>0.238<br>1.395  | $\pm 1/2$ |
| 4   | 2838.7             | 0.021<br>0.029<br>10.096 | $\pm 7/2$ | 2879.4             | 0.031<br>0.047<br>10.202 | $\pm 7/2$ | 2909.5             | 0.037<br>0.057<br>10.314 | $\pm 7/2$ |
| KDs | <b>177°</b>        |                          |           | <b>178°</b>        |                          |           | <b>179°</b>        |                          |           |
|     | $E/\text{cm}^{-1}$ | <b>g</b>                 | $m_J$     | $E/\text{cm}^{-1}$ | <b>g</b>                 | $m_J$     | $E/\text{cm}^{-1}$ | <b>g</b>                 | $m_J$     |
| 0   | 0.0                | 0.004<br>0.004<br>10.739 | $\pm 9/2$ | 0.0                | 0.004<br>0.005<br>10.731 | $\pm 9/2$ | 0.0                | 0.004<br>0.005<br>10.725 | $\pm 9/2$ |
| 1   | 382.2              | 0.117<br>0.121<br>6.696  | $\pm 5/2$ | 381.8              | 0.110<br>0.114<br>6.688  | $\pm 5/2$ | 381.5              | 0.115<br>0.119<br>6.682  | $\pm 5/2$ |
| 2   | 770.3              | 0.194<br>0.455<br>2.649  | $\pm 3/2$ | 769.6              | 0.199<br>0.446<br>2.642  | $\pm 3/2$ | 769.1              | 0.192<br>0.446<br>2.636  | $\pm 3/2$ |
| 3   | 1172.6             | 0.222<br>0.236<br>1.402  | $\pm 1/2$ | 1171.6             | 0.220<br>0.234<br>1.408  | $\pm 1/2$ | 1170.9             | 0.218<br>0.232<br>1.413  | $\pm 1/2$ |
| 4   | 2927.7             | 0.039<br>0.059<br>10.427 | $\pm 7/2$ | 2932.5             | 0.038<br>0.056<br>10.522 | $\pm 7/2$ | 2921.3             | 0.036<br>0.052<br>10.576 | $\pm 7/2$ |
| KDs | <b>180°</b>        |                          |           |                    |                          |           |                    |                          |           |
|     | $E/\text{cm}^{-1}$ | <b>g</b>                 | $m_J$     |                    |                          |           |                    |                          |           |
| 0   | 0.0                | 0.004<br>0.005<br>10.719 | $\pm 9/2$ |                    |                          |           |                    |                          |           |
| 1   | 381.2              | 0.123<br>0.127<br>6.676  | $\pm 5/2$ |                    |                          |           |                    |                          |           |
| 2   | 768.6              | 0.181<br>0.450<br>2.630  | $\pm 3/2$ |                    |                          |           |                    |                          |           |
| 3   | 1170.2             | 0.215<br>0.230<br>1.417  | $\pm 1/2$ |                    |                          |           |                    |                          |           |
| 4   | 2902.3             | 0.031<br>0.045<br>10.648 | $\pm 7/2$ |                    |                          |           |                    |                          |           |

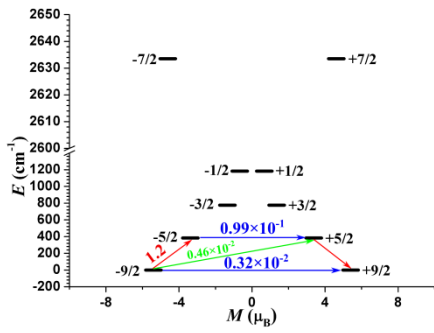

$3^*_\text{CAS} (11, 8) \_\theta_{171^\circ} \_383.6 \text{ cm}^{-1}$

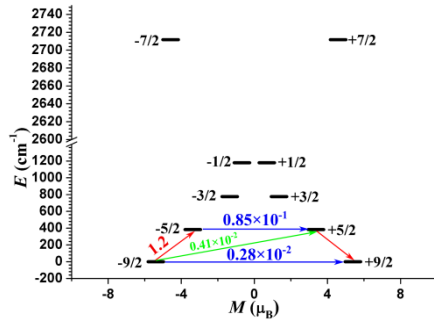

$3^*_\text{CAS} (11, 8) \_\theta_{172^\circ} \_383.5 \text{ cm}^{-1}$

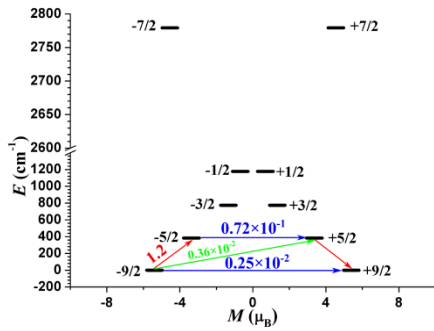

$3^*_\text{CAS} (11, 8) \_\theta_{173^\circ} \_383.3 \text{ cm}^{-1}$

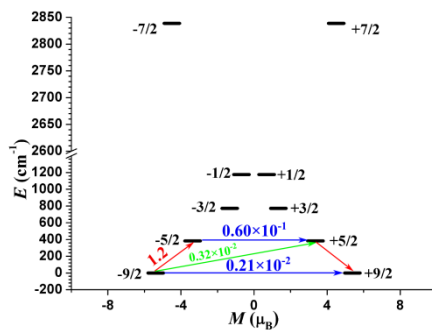

$3^*_\text{CAS} (11, 8) \_\theta_{174^\circ} \_383.0 \text{ cm}^{-1}$

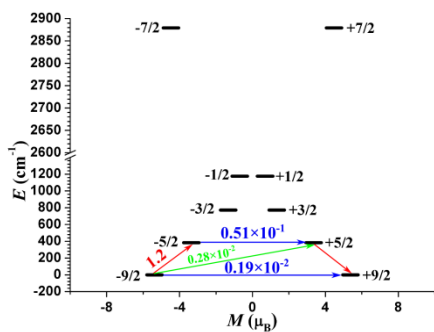

$3^*_\text{CAS} (11, 8) \_\theta_{175^\circ} \_382.6 \text{ cm}^{-1}$

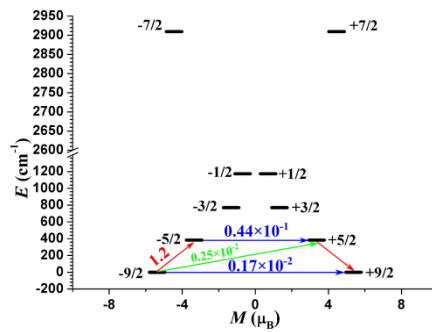

$3^*_\text{CAS} (11, 8) \_\theta_{176^\circ} \_382.5 \text{ cm}^{-1}$

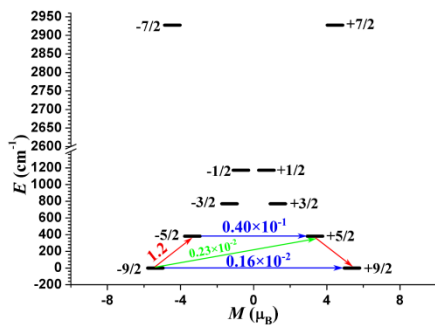

$3^*_\text{CAS} (11, 8) \_\theta_{177^\circ} \_382.2 \text{ cm}^{-1}$

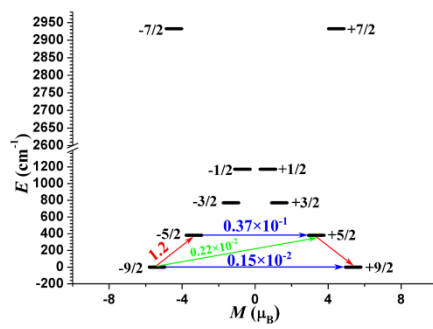

$3^*_\text{CAS} (11, 8) \_\theta_{178^\circ} \_381.8 \text{ cm}^{-1}$

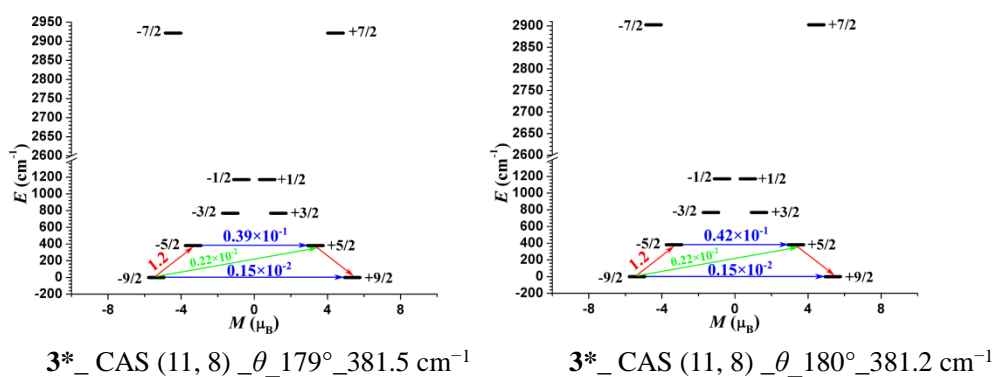

**Figure S8.** Magnetization blocking barriers for  $3^*$  with  $\theta$  from  $171^\circ$  to  $180^\circ$  (CAS (11, 8)). The thick black lines represent the KDs of the  $\text{Co}^{\text{II}}$  ion as a function of their magnetic moment along the magnetic axis. The blue lines correspond to diagonal matrix element of the transversal magnetic moment; the green lines represent Orbach relaxation processes. The path shown by the red arrows represent the most probable path for magnetic relaxation in the corresponding compounds. The numbers at each arrow stand for the mean absolute value of the corresponding matrix element of transition magnetic moment.

**Table S18.** Calculated spin-free and spin-orbit energy ( $\text{cm}^{-1}$ ) of the lowest five KDs for  $3^*$  with  $\theta$  from  $171^\circ$  to  $180^\circ$  by CAS (11, 8) using CASSCF/SINGLE\_ANISO with ORCA 5.0.3.

|   | $171^\circ$ |            | $172^\circ$ |            | $173^\circ$ |            | $174^\circ$ |            |
|---|-------------|------------|-------------|------------|-------------|------------|-------------|------------|
|   | Spin-free   | Spin-orbit | Spin-free   | Spin-orbit | Spin-free   | Spin-orbit | Spin-free   | Spin-orbit |
| 0 | 0.0         | 0.0        | 0.0         | 0.0        | 0.0         | 0.0        | 0.0         | 0.0        |
| 1 | 30.3        | 383.6      | 26.1        | 383.5      | 22.4        | 383.3      | 19.0        | 383.0      |
| 2 | 2543.0      | 776.0      | 2629.0      | 774.9      | 2704.8      | 773.7      | 2773.9      | 772.7      |
| 3 | 2564.8      | 1182.4     | 2646.0      | 1180.3     | 2417.4      | 1178.3     | 2782.2      | 1176.5     |
| 4 | 3411.9      | 2633.5     | 3466.6      | 2711.7     | 3515.3      | 2779.3     | 3561.1      | 2838.7     |
|   | $175^\circ$ |            | $176^\circ$ |            | $177^\circ$ |            | $178^\circ$ |            |
|   | Spin-free   | Spin-orbit | Spin-free   | Spin-orbit | Spin-free   | Spin-orbit | Spin-free   | Spin-orbit |
| 0 | 0.0         | 0.0        | 0.0         | 0.0        | 0.0         | 0.0        | 0.0         | 0.0        |
| 1 | 16.3        | 382.7      | 14.2        | 382.5      | 12.7        | 382.2      | 12.9        | 381.8      |
| 2 | 2823.1      | 771.8      | 2862.1      | 771.0      | 2887.1      | 770.3      | 2897.4      | 769.6      |
| 3 | 2827.5      | 1175.0     | 2863.0      | 1173.7     | 2889.3      | 1172.6     | 2902.0      | 1171.6     |
| 4 | 3598.7      | 2879.4     | 3631.5      | 2909.5     | 3655.0      | 2927.7     | 3667.7      | 2932.5     |
|   | $179^\circ$ |            | $180^\circ$ |            |             |            |             |            |
|   | Spin-free   | Spin-orbit | Spin-free   | Spin-orbit |             |            |             |            |

|   |        |        |        |        |  |  |  |  |
|---|--------|--------|--------|--------|--|--|--|--|
| 0 | 0.0    | 0.0    | 0.0    | 0.0    |  |  |  |  |
| 1 | 12.7   | 381.5  | 12.2   | 381.2  |  |  |  |  |
| 2 | 2889.1 | 769.1  | 2875.1 | 768.6  |  |  |  |  |
| 3 | 2895.4 | 1170.9 | 2882.6 | 1170.2 |  |  |  |  |
| 4 | 3670.2 | 2921.3 | 3673.2 | 2902.3 |  |  |  |  |

**Table S19.** Calculated Mulliken spin densities on Co<sup>II</sup>, N(imido), C(carbene), C(arene) and [CoN]<sup>+</sup> for **3\*** with  $\theta$  from 171° to 180° at their spin state  $S = 3/2$  by CAS (11, 8) using CASSCF/SINGLE\_ANISO with ORCA 5.0.3.

| Spin density       | 171°     | 172°     | 173°     | 174°     | 175°     |
|--------------------|----------|----------|----------|----------|----------|
| Co <sup>II</sup>   | 2.036554 | 2.029421 | 2.023627 | 2.019305 | 2.016611 |
| N                  | 0.522116 | 0.521817 | 0.521544 | 0.521298 | 0.521073 |
| [CoN] <sup>+</sup> | 2.558670 | 2.551238 | 2.545171 | 2.540603 | 2.537684 |
| C(carbene)         | 0.166410 | 0.170518 | 0.173725 | 0.175953 | 0.177132 |
| C(arene)           | 0.042069 | 0.042953 | 0.043673 | 0.044209 | 0.044545 |
| Spin density       | 176°     | 177°     | 178°     | 179°     | 180°     |
| Co <sup>II</sup>   | 2.015572 | 2.015215 | 2.014501 | 2.014498 | 2.014157 |
| N                  | 0.520871 | 0.520683 | 0.520509 | 0.520742 | 0.520188 |
| [CoN] <sup>+</sup> | 2.536443 | 2.535898 | 2.535010 | 2.535240 | 2.534345 |
| C(carbene)         | 0.177252 | 0.177608 | 0.178344 | 0.178541 | 0.178669 |
| C(arene)           | 0.044673 | 0.044690 | 0.044702 | 0.044734 | 0.044758 |

**Table S20.** Calculated crystal field parameters  $B(k, q)$  and the corresponding weights of **3\*** (CAS (11, 8)) with  $\theta$  from 171° to 180° by using CASSCF/SINGLE\_ANISO with ORCA 5.0.3.

| 171° |     |                     |            | 172° |     |                        |            | 173° |     |                       |            |
|------|-----|---------------------|------------|------|-----|------------------------|------------|------|-----|-----------------------|------------|
| $k$  | $q$ | $B(k, q)$           | Weight (%) | $k$  | $q$ | $B(k, q)$              | Weight (%) | $k$  | $q$ | $B(k, q)$             | Weight (%) |
| 2    | -2  | $0.68 \times 10^2$  | 12.27      | 2    | -2  | $0.36 \times 10^2$     | 6.10       | 2    | -2  | $0.66 \times 10^2$    | 12.37      |
| 2    | -1  | $-0.18 \times 10^2$ | 3.21       | 2    | -1  | $0.61 \times 10^1$     | 1.03       | 2    | -1  | $0.79 \times 10^1$    | 1.48       |
| 2    | 0   | $-0.87 \times 10^2$ | 15.69      | 2    | 0   | $-0.87 \times 10^2$    | 14.57      | 2    | 0   | $-0.89 \times 10^2$   | 16.73      |
| 2    | 1   | $-0.15 \times 10^2$ | 2.75       | 2    | 1   | $0.21 \times 10^2$     | 3.47       | 2    | 1   | $0.11 \times 10^2$    | 2.09       |
| 2    | 2   | $-0.98 \times 10^1$ | 1.77       | 2    | 2   | $0.60 \times 10^2$     | 10.11      | 2    | 2   | $0.84 \times 10^1$    | 1.58       |
| 4    | -4  | $0.25 \times 10^1$  | 0.12       | 4    | -4  | $-0.40 \times 10^{-1}$ | 0.18       | 4    | -4  | $0.18 \times 10^{-2}$ | 0.01       |
| 4    | -3  | $-0.12 \times 10^0$ | 0.57       | 4    | -3  | $0.34 \times 10^0$     | 1.54       | 4    | -3  | $0.21 \times 10^0$    | 1.07       |
| 4    | -2  | $0.51 \times 10^1$  | 24.69      | 4    | -2  | $0.29 \times 10^1$     | 12.96      | 4    | -2  | $0.48 \times 10^1$    | 24.66      |
| 4    | -1  | $-0.21 \times 10^0$ | 1.02       | 4    | -1  | $-0.36 \times 10^{-2}$ | 0.02       | 4    | -1  | $0.75 \times 10^0$    | 3.81       |
| 4    | 0   | $0.27 \times 10^0$  | 1.31       | 4    | 0   | $0.17 \times 10^0$     | 0.76       | 4    | 0   | $0.57 \times 10^0$    | 2.93       |

|             |          |                                  |            |             |          |                                  |            |             |          |                                  |            |
|-------------|----------|----------------------------------|------------|-------------|----------|----------------------------------|------------|-------------|----------|----------------------------------|------------|
| 4           | 1        | -0.31×10 <sup>0</sup>            | 1.52       | 4           | 1        | 0.22×10 <sup>0</sup>             | 1.01       | 4           | 1        | 0.88×10 <sup>0</sup>             | 4.48       |
| 4           | 2        | -0.97×10 <sup>0</sup>            | 4.70       | 4           | 2        | 0.44×10 <sup>1</sup>             | 20.11      | 4           | 2        | 0.41×10 <sup>0</sup>             | 2.12       |
| 4           | 3        | 0.41×10 <sup>0</sup>             | 1.99       | 4           | 3        | 0.21×10 <sup>0</sup>             | 0.97       | 4           | 3        | -0.27×10 <sup>0</sup>            | 1.36       |
| 4           | 4        | 0.31×10 <sup>-1</sup>            | 0.15       | 4           | 4        | -0.84×10 <sup>-2</sup>           | 0.04       | 4           | 4        | 0.16×10 <sup>-1</sup>            | 0.08       |
| 6           | -6       | 0.11×10 <sup>-3</sup>            | 0.00       | 6           | -6       | -0.14×10 <sup>-3</sup>           | 0.00       | 6           | -6       | -0.83×10 <sup>-3</sup>           | 0.03       |
| 6           | -5       | -0.17×10 <sup>-2</sup>           | 0.06       | 6           | -5       | -0.20×10 <sup>-2</sup>           | 0.07       | 6           | -5       | 0.69×10 <sup>-3</sup>            | 0.03       |
| 6           | -4       | 0.56×10 <sup>-2</sup>            | 0.20       | 6           | -4       | -0.82×10 <sup>-2</sup>           | 0.27       | 6           | -4       | 0.21×10 <sup>-2</sup>            | 0.08       |
| 6           | -3       | -0.39×10 <sup>-2</sup>           | 0.14       | 6           | -3       | -0.76×10 <sup>-2</sup>           | 0.25       | 6           | -3       | 0.48×10 <sup>-2</sup>            | 0.18       |
| 6           | -2       | 0.24×10 <sup>0</sup>             | 8.46       | 6           | -2       | 0.14×10 <sup>0</sup>             | 4.57       | 6           | -2       | 0.24×10 <sup>0</sup>             | 8.85       |
| 6           | -1       | -0.13×10 <sup>0</sup>            | 4.67       | 6           | -1       | 0.52×10 <sup>-1</sup>            | 1.72       | 6           | -1       | 0.82×10 <sup>-1</sup>            | 3.10       |
| 6           | 0        | -0.26×10 <sup>0</sup>            | 9.37       | 6           | 0        | -0.27×10 <sup>0</sup>            | 9.12       | 6           | 0        | -0.25×10 <sup>0</sup>            | 9.47       |
| 6           | 1        | -0.81×10 <sup>-1</sup>           | 2.90       | 6           | 1        | 0.13×10 <sup>0</sup>             | 4.24       | 6           | 1        | 0.76×10 <sup>-1</sup>            | 2.84       |
| 6           | 2        | -0.52×10 <sup>-1</sup>           | 1.87       | 6           | 2        | 0.20×10 <sup>0</sup>             | 6.82       | 6           | 2        | 0.90×10 <sup>-2</sup>            | 0.34       |
| 6           | 3        | -0.95×10 <sup>-2</sup>           | 0.34       | 6           | 3        | -0.21×10 <sup>-3</sup>           | 0.01       | 6           | 3        | 0.11×10 <sup>-2</sup>            | 0.04       |
| 6           | 4        | 0.61×10 <sup>-2</sup>            | 0.22       | 6           | 4        | -0.15×10 <sup>-2</sup>           | 0.05       | 6           | 4        | 0.70×10 <sup>-2</sup>            | 0.26       |
| 6           | 5        | 0.14×10 <sup>-3</sup>            | 0.00       | 6           | 5        | 0.25×10 <sup>-3</sup>            | 0.01       | 6           | 5        | 0.41×10 <sup>-3</sup>            | 0.02       |
| 6           | 6        | -0.14×10 <sup>-3</sup>           | 0.00       | 6           | 6        | 0.55×10 <sup>-4</sup>            | 0.00       | 6           | 6        | 0.13×10 <sup>-3</sup>            | 0.00       |
| <b>174°</b> |          |                                  |            | <b>175°</b> |          |                                  |            | <b>176°</b> |          |                                  |            |
| <i>k</i>    | <i>q</i> | <i>B</i> ( <i>k</i> , <i>q</i> ) | Weight (%) | <i>k</i>    | <i>q</i> | <i>B</i> ( <i>k</i> , <i>q</i> ) | Weight (%) | <i>k</i>    | <i>q</i> | <i>B</i> ( <i>k</i> , <i>q</i> ) | Weight (%) |
| 2           | -2       | 0.23×10 <sup>2</sup>             | 4.12       | 2           | -2       | -0.75×10 <sup>2</sup>            | 9.36       | 2           | -2       | 0.38×10 <sup>2</sup>             | 6.78       |
| 2           | -1       | -0.11×10 <sup>2</sup>            | 2.09       | 2           | -1       | -0.28×10 <sup>1</sup>            | 0.63       | 2           | -1       | -0.73×10 <sup>1</sup>            | 1.31       |
| 2           | 0        | -0.88×10 <sup>2</sup>            | 16.05      | 2           | 0        | -0.24×10 <sup>2</sup>            | 15.23      | 2           | 0        | -0.88×10 <sup>2</sup>            | 15.77      |
| 2           | 1        | -0.24×10 <sup>1</sup>            | 0.44       | 2           | 1        | 0.22×10 <sup>1</sup>             | 1.57       | 2           | 1        | -0.25×10 <sup>1</sup>            | 0.46       |
| 2           | 2        | -0.63×10 <sup>2</sup>            | 11.49      | 2           | 2        | 0.88×10 <sup>2</sup>             | 7.31       | 2           | 2        | -0.58×10 <sup>2</sup>            | 10.47      |
| 4           | -4       | 1.00×10 <sup>-2</sup>            | 0.05       | 4           | -4       | 0.11×10 <sup>-1</sup>            | 0.07       | 4           | -4       | 0.17×10 <sup>-1</sup>            | 0.08       |
| 4           | -3       | 0.27×10 <sup>0</sup>             | 1.34       | 4           | -3       | -0.48×10 <sup>0</sup>            | 1.20       | 4           | -3       | 0.16×10 <sup>0</sup>             | 0.79       |
| 4           | -2       | 0.16×10 <sup>1</sup>             | 7.94       | 4           | -2       | -0.50×10 <sup>1</sup>            | 19.08      | 4           | -2       | 0.27×10 <sup>1</sup>             | 13.04      |
| 4           | -1       | -0.96×10 <sup>0</sup>            | 4.73       | 4           | -1       | 0.25×10 <sup>0</sup>             | 1.52       | 4           | -1       | -0.51×10 <sup>0</sup>            | 2.47       |
| 4           | 0        | 0.47×10 <sup>0</sup>             | 2.32       | 4           | 0        | 0.48×10 <sup>0</sup>             | 1.80       | 4           | 0        | 0.32×10 <sup>0</sup>             | 1.56       |
| 4           | 1        | -0.17×10 <sup>0</sup>            | 0.85       | 4           | 1        | 0.15×10 <sup>0</sup>             | 3.27       | 4           | 1        | -0.16×10 <sup>0</sup>            | 0.77       |
| 4           | 2        | -0.47×10 <sup>1</sup>            | 23.00      | 4           | 2        | -0.87×10 <sup>-1</sup>           | 13.77      | 4           | 2        | -0.43×10 <sup>1</sup>            | 21.06      |
| 4           | 3        | 0.12×10 <sup>0</sup>             | 0.61       | 4           | 3        | 0.38×10 <sup>-1</sup>            | 0.09       | 4           | 3        | 0.14×10 <sup>0</sup>             | 0.69       |
| 4           | 4        | -0.15×10 <sup>-1</sup>           | 0.07       | 4           | 4        | -0.11×10 <sup>-1</sup>           | 0.05       | 4           | 4        | -0.12×10 <sup>-1</sup>           | 0.06       |
| 6           | -6       | 0.64×10 <sup>-3</sup>            | 0.02       | 6           | -6       | -0.10×10 <sup>-4</sup>           | 0.00       | 6           | -6       | 0.84×10 <sup>-3</sup>            | 0.03       |
| 6           | -5       | 0.70×10 <sup>-3</sup>            | 0.03       | 6           | -5       | -0.31×10 <sup>-3</sup>           | 0.01       | 6           | -5       | 0.42×10 <sup>-3</sup>            | 0.01       |
| 6           | -4       | 0.36×10 <sup>-2</sup>            | 0.13       | 6           | -4       | 0.95×10 <sup>-2</sup>            | 0.17       | 6           | -4       | 0.52×10 <sup>-2</sup>            | 0.19       |
| 6           | -3       | 0.13×10 <sup>-2</sup>            | 0.05       | 6           | -3       | 0.23×10 <sup>-2</sup>            | 0.08       | 6           | -3       | 0.76×10 <sup>-3</sup>            | 0.03       |
| 6           | -2       | 0.75×10 <sup>-1</sup>            | 2.72       | 6           | -2       | 0.20×10 <sup>0</sup>             | 6.90       | 6           | -2       | 0.12×10 <sup>0</sup>             | 4.43       |
| 6           | -1       | -0.95×10 <sup>-1</sup>           | 3.42       | 6           | -1       | -0.36×10 <sup>-1</sup>           | 1.37       | 6           | -1       | -0.53×10 <sup>-1</sup>           | 1.89       |
| 6           | 0        | -0.26×10 <sup>0</sup>            | 9.47       | 6           | 0        | 0.75×10 <sup>0</sup>             | 9.31       | 6           | 0        | -0.28×10 <sup>0</sup>            | 9.92       |
| 6           | 1        | -0.13×10 <sup>-1</sup>           | 0.49       | 6           | 1        | -0.53×10 <sup>-1</sup>           | 2.22       | 6           | 1        | -0.13×10 <sup>-1</sup>           | 0.45       |
| 6           | 2        | -0.23×10 <sup>0</sup>            | 8.22       | 6           | 2        | -0.15×10 <sup>0</sup>            | 4.58       | 6           | 2        | -0.21×10 <sup>0</sup>            | 7.48       |
| 6           | 3        | 0.18×10 <sup>-2</sup>            | 0.07       | 6           | 3        | 0.77×10 <sup>-2</sup>            | 0.09       | 6           | 3        | 0.24×10 <sup>-2</sup>            | 0.08       |





|   |    |                        |       |  |  |  |  |  |  |  |  |
|---|----|------------------------|-------|--|--|--|--|--|--|--|--|
| 4 | 0  | 0.30×10 <sup>0</sup>   | 1.55  |  |  |  |  |  |  |  |  |
| 4 | 1  | -0.48×10 <sup>0</sup>  | 2.44  |  |  |  |  |  |  |  |  |
| 4 | 2  | 0.20×10 <sup>1</sup>   | 10.19 |  |  |  |  |  |  |  |  |
| 4 | 3  | -0.21×10 <sup>-1</sup> | 0.11  |  |  |  |  |  |  |  |  |
| 4 | 4  | 0.22×10 <sup>-1</sup>  | 0.11  |  |  |  |  |  |  |  |  |
| 6 | -6 | 0.67×10 <sup>-3</sup>  | 0.03  |  |  |  |  |  |  |  |  |
| 6 | -5 | -0.27×10 <sup>-3</sup> | 0.01  |  |  |  |  |  |  |  |  |
| 6 | -4 | 0.18×10 <sup>-2</sup>  | 0.07  |  |  |  |  |  |  |  |  |
| 6 | -3 | -0.13×10 <sup>-2</sup> | 0.05  |  |  |  |  |  |  |  |  |
| 6 | -2 | -0.23×10 <sup>0</sup>  | 8.51  |  |  |  |  |  |  |  |  |
| 6 | -1 | 0.26×10 <sup>-1</sup>  | 0.98  |  |  |  |  |  |  |  |  |
| 6 | 0  | -0.28×10 <sup>0</sup>  | 10.63 |  |  |  |  |  |  |  |  |
| 6 | 1  | -0.36×10 <sup>-1</sup> | 1.33  |  |  |  |  |  |  |  |  |
| 6 | 2  | 0.85×10 <sup>-1</sup>  | 3.20  |  |  |  |  |  |  |  |  |
| 6 | 3  | -0.90×10 <sup>-4</sup> | 0.00  |  |  |  |  |  |  |  |  |
| 6 | 4  | 0.52×10 <sup>-2</sup>  | 0.20  |  |  |  |  |  |  |  |  |
| 6 | 5  | 0.94×10 <sup>-3</sup>  | 0.04  |  |  |  |  |  |  |  |  |
| 6 | 6  | -0.64×10 <sup>-3</sup> | 0.02  |  |  |  |  |  |  |  |  |

**Table S21.** Calculated energy levels (cm<sup>-1</sup>),  $\mathbf{g}$  ( $g_x, g_y, g_z$ ) tensors and predominant  $m_J$  values in the lowest five KDs for  $\mathbf{3}^*$  with  $\varphi$  from 171° to 180° by CAS (11, 8) using CASSCF/SINGLE\_ANISO with ORCA 5.0.3.

| KDs | 171°               |              |           | 172°               |              |           | 173°               |              |           |
|-----|--------------------|--------------|-----------|--------------------|--------------|-----------|--------------------|--------------|-----------|
|     | $E/\text{cm}^{-1}$ | $\mathbf{g}$ | $m_J$     | $E/\text{cm}^{-1}$ | $\mathbf{g}$ | $m_J$     | $E/\text{cm}^{-1}$ | $\mathbf{g}$ | $m_J$     |
| 0   | 0.0                | 0.004        | $\pm 9/2$ | 0.0                | 0.004        | $\pm 9/2$ | 0.0                | 0.004        | $\pm 9/2$ |
|     |                    | 0.004        |           |                    | 0.004        |           |                    | 0.005        |           |
|     |                    | 10.692       |           |                    | 10.705       |           |                    | 10.720       |           |
| 1   | 379.5              | 0.090        | $\pm 5/2$ | 380.3              | 0.105        | $\pm 5/2$ | 381.2              | 0.121        | $\pm 5/2$ |
|     |                    | 0.094        |           |                    | 0.109        |           |                    | 0.125        |           |
|     |                    | 6.647        |           |                    | 6.661        |           |                    | 6.677        |           |
| 2   | 764.9              | 0.218        | $\pm 3/2$ | 766.7              | 0.201        | $\pm 3/2$ | 768.7              | 0.183        | $\pm 3/2$ |
|     |                    | 0.423        |           |                    | 0.435        |           |                    | 0.448        |           |
|     |                    | 2.601        |           |                    | 2.615        |           |                    | 2.631        |           |
| 3   | 1164.8             | 0.218        | $\pm 1/2$ | 1167.5             | 0.217        | $\pm 1/2$ | 1170.4             | 0.215        | $\pm 1/2$ |
|     |                    | 0.231        |           |                    | 0.231        |           |                    | 0.230        |           |
|     |                    | 1.446        |           |                    | 1.432        |           |                    | 1.417        |           |

|     |                    |                          |           |                    |                          |           |                    |                          |           |
|-----|--------------------|--------------------------|-----------|--------------------|--------------------------|-----------|--------------------|--------------------------|-----------|
| 4   | 3062.2             | 0.026<br>0.035<br>10.875 | $\pm 7/2$ | 2983.5             | 0.028<br>0.039<br>10.778 | $\pm 7/2$ | 2904.3             | 0.031<br>0.045<br>10.663 | $\pm 7/2$ |
| KDs | <b>174°</b>        |                          |           | <b>175°</b>        |                          |           | <b>176°</b>        |                          |           |
|     | $E/\text{cm}^{-1}$ | <b><i>g</i></b>          | $m_J$     | $E/\text{cm}^{-1}$ | <b><i>g</i></b>          | $m_J$     | $E/\text{cm}^{-1}$ | <b><i>g</i></b>          | $m_J$     |
| 0   | 0.0                | 0.005<br>0.005<br>10.732 | $\pm 9/2$ | 0.0                | 0.005<br>0.005<br>10.744 | $\pm 9/2$ | 0.0                | 0.000<br>0.000<br>10.755 | $\pm 9/2$ |
| 1   | 382.0              | 0.133<br>0.137<br>6.689  | $\pm 5/2$ | 382.7              | 0.146<br>0.150<br>6.702  | $\pm 5/2$ | 383.5              | 0.157<br>0.161<br>6.715  | $\pm 5/2$ |
| 2   | 770.3              | 0.170<br>0.458<br>2.644  | $\pm 3/2$ | 772.0              | 0.155<br>0.468<br>2.658  | $\pm 3/2$ | 773.6              | 0.142<br>0.477<br>2.671  | $\pm 3/2$ |
| 3   | 1172.8             | 0.214<br>0.229<br>1.405  | $\pm 1/2$ | 1175.3             | 0.212<br>0.228<br>1.391  | $\pm 1/2$ | 1177.7             | 0.211<br>0.228<br>1.378  | $\pm 1/2$ |
| 4   | 2845.6             | 0.034<br>0.049<br>10.562 | $\pm 7/2$ | 2788.3             | 0.038<br>0.056<br>10.443 | $\pm 7/2$ | 2739.8             | 0.042<br>0.063<br>10.319 | $\pm 7/2$ |
| KDs | <b>177°</b>        |                          |           | <b>178°</b>        |                          |           | <b>179°</b>        |                          |           |
|     | $E/\text{cm}^{-1}$ | <b><i>g</i></b>          | $m_J$     | $E/\text{cm}^{-1}$ | <b><i>g</i></b>          | $m_J$     | $E/\text{cm}^{-1}$ | <b><i>g</i></b>          | $m_J$     |
| 0   | 0.0                | 0.005<br>0.005<br>10.765 | $\pm 9/2$ | 0.0                | 0.006<br>0.006<br>10.775 | $\pm 9/2$ | 0.0                | 0.006<br>0.006<br>10.782 | $\pm 9/2$ |
| 1   | 384.1              | 0.167<br>0.171<br>6.727  | $\pm 5/2$ | 384.6              | 0.175<br>0.179<br>6.737  | $\pm 5/2$ | 385.1              | 0.181<br>0.185<br>6.745  | $\pm 5/2$ |
| 2   | 775.0              | 0.131                    | $\pm 3/2$ | 776.3              | 0.122                    | $\pm 3/2$ | 777.2              | 0.115                    | $\pm 3/2$ |

|     |                    |        |           |        |        |           |        |       |           |
|-----|--------------------|--------|-----------|--------|--------|-----------|--------|-------|-----------|
|     |                    | 0.485  |           |        | 0.492  |           |        | 0.497 |           |
|     |                    | 2.683  |           |        | 2.694  |           |        | 2.702 |           |
| 3   | 1179.8             | 0.210  | $\pm 1/2$ | 1181.7 | 0.209  | $\pm 1/2$ | 1183.1 | 0.208 | $\pm 1/2$ |
|     |                    | 0.227  |           |        | 0.227  |           |        | 0.227 |           |
|     |                    | 1.366  |           |        | 1.356  |           |        | 1.347 |           |
| 4   | 2700.7             | 0.047  | $\pm 7/2$ | 2671.8 | 0.052  | $\pm 7/2$ | 2653.4 | 0.058 | $\pm 7/2$ |
|     |                    | 0.072  |           |        | 0.082  |           |        | 0.095 |           |
|     |                    | 10.190 |           |        | 10.059 |           |        | 9.931 |           |
| KDs | <b>180°</b>        |        |           |        |        |           |        |       |           |
|     | $E/\text{cm}^{-1}$ | $g$    | $m_J$     |        |        |           |        |       |           |
| 0   | 0.0                | 0.006  | $\pm 9/2$ |        |        |           |        |       |           |
|     |                    | 0.006  |           |        |        |           |        |       |           |
|     |                    | 10.787 |           |        |        |           |        |       |           |
| 1   | 385.4              | 0.185  | $\pm 5/2$ |        |        |           |        |       |           |
|     |                    | 0.189  |           |        |        |           |        |       |           |
|     |                    | 6.751  |           |        |        |           |        |       |           |
| 2   | 778.0              | 0.110  | $\pm 3/2$ |        |        |           |        |       |           |
|     |                    | 0.500  |           |        |        |           |        |       |           |
|     |                    | 2.709  |           |        |        |           |        |       |           |
| 3   | 1184.2             | 0.208  | $\pm 1/2$ |        |        |           |        |       |           |
|     |                    | 0.227  |           |        |        |           |        |       |           |
|     |                    | 1.341  |           |        |        |           |        |       |           |
| 4   | 2645.7             | 0.065  | $\pm 7/2$ |        |        |           |        |       |           |
|     |                    | 0.108  |           |        |        |           |        |       |           |
|     |                    | 9.814  |           |        |        |           |        |       |           |

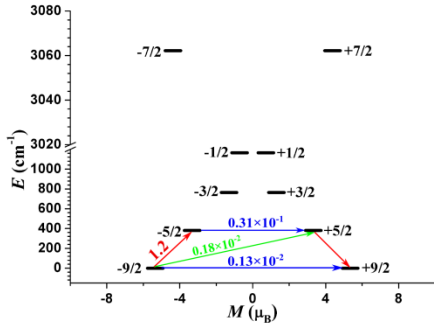

3\*\_CAS (11, 8) \_171°\_φ\_379.5 cm<sup>-1</sup>

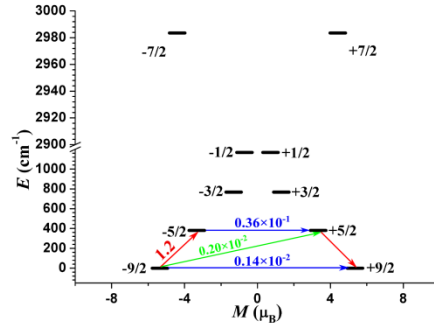

3\*\_CAS (11, 8) \_172°\_φ\_380.3 cm<sup>-1</sup>

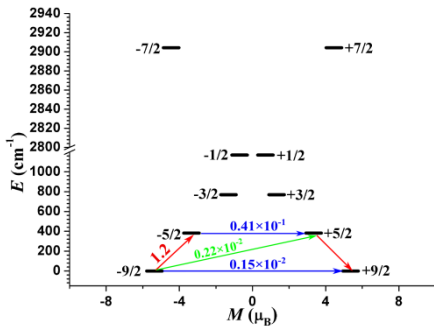

3\*\_CAS (11, 8) \_173°\_φ\_381.2 cm<sup>-1</sup>

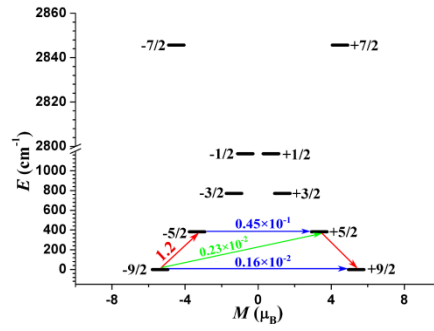

3\*\_CAS (11, 8) \_174°\_φ\_382.0 cm<sup>-1</sup>

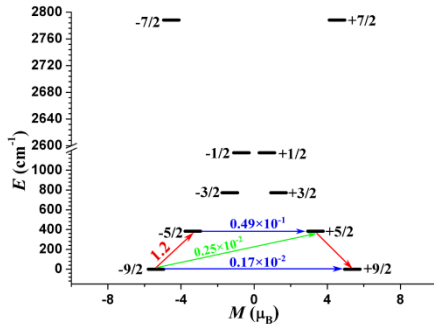

3\*\_CAS (11, 8) \_175°\_φ\_382.7 cm<sup>-1</sup>

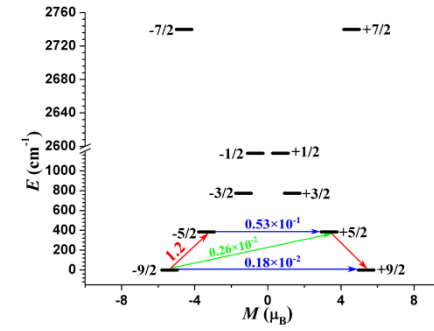

3\*\_CAS (11, 8) \_176°\_φ\_383.5 cm<sup>-1</sup>

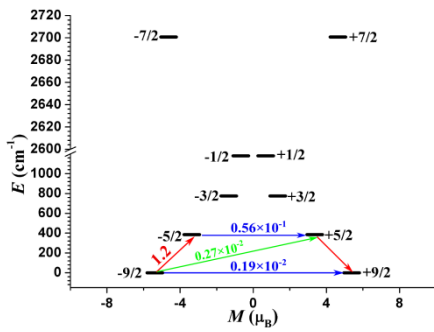

3\*\_CAS (11, 8) \_177°\_φ\_384.1 cm<sup>-1</sup>

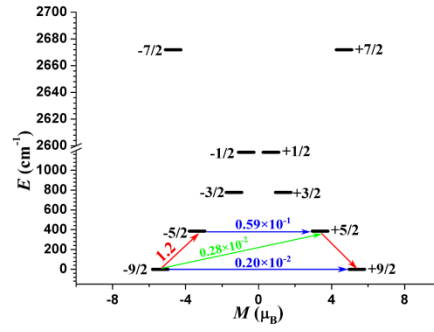

3\*\_CAS (11, 8) \_178°\_φ\_384.6 cm<sup>-1</sup>

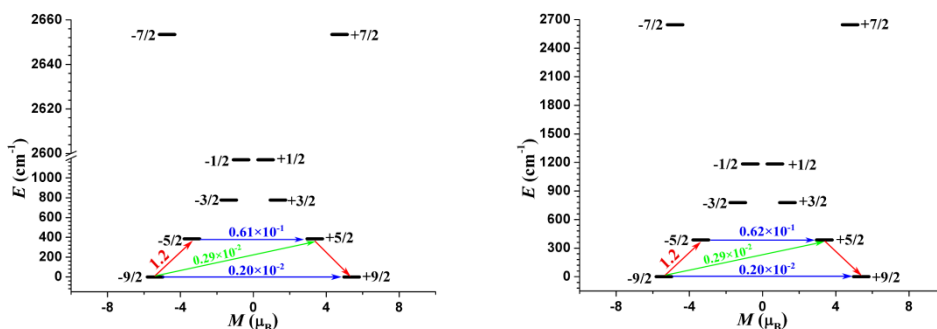

$3^*_\text{CAS (11, 8)}_{179^\circ_\varphi}$  385.1  $\text{cm}^{-1}$

$3^*_\text{CAS (11, 8)}_{180^\circ_\varphi}$  385.4  $\text{cm}^{-1}$

**Figure S9.** Magnetization blocking barriers for  $3^*$  (CAS (11, 8)) with  $\varphi$  from  $171^\circ$  to  $180^\circ$ . The thick black lines represent the KDs of the  $\text{Co}^{\text{II}}$  ion as a function of their magnetic moment along the magnetic axis. The blue lines correspond to diagonal matrix element of the transversal magnetic moment; the green lines represent Orbach relaxation processes. The path shown by the red arrows represent the most probable path for magnetic relaxation in the corresponding compounds. The numbers at each arrow stand for the mean absolute value of the corresponding matrix element of transition magnetic moment.

**Table S22.** Calculated spin-free and spin-orbit energy ( $\text{cm}^{-1}$ ) of the lowest five KDs for  $3^*$  with  $\varphi$  from  $171^\circ$  to  $180^\circ$  by CAS (11, 8) using CASSCF/SINGLE\_ANISO with ORCA 5.0.3.

|   | $171^\circ$ |            | $172^\circ$ |            | $173^\circ$ |            | $174^\circ$ |            |
|---|-------------|------------|-------------|------------|-------------|------------|-------------|------------|
|   | Spin-free   | Spin-orbit | Spin-free   | Spin-orbit | Spin-free   | Spin-orbit | Spin-free   | Spin-orbit |
| 0 | 0.0         | 0.0        | 0.0         | 0.0        | 0.0         | 0.0        | 0.0         | 0.0        |
| 1 | 10.3        | 380.7      | 12.4        | 381.4      | 14.3        | 382.2      | 16.3        | 383.0      |
| 2 | 3055.8      | 767.0      | 2963.7      | 768.7      | 2878.4      | 770.5      | 2792.1      | 772.4      |
| 3 | 3055.9      | 1167.6     | 2964.9      | 1170.3     | 2880.5      | 1172.9     | 2794.9      | 1175.9     |
| 4 | 3744.1      | 3075.3     | 3689.3      | 2996.1     | 3639.5      | 2922.8     | 3590.1      | 2849.7     |
|   | $175^\circ$ |            | $176^\circ$ |            | $177^\circ$ |            | $178^\circ$ |            |
|   | Spin-free   | Spin-orbit | Spin-free   | Spin-orbit | Spin-free   | Spin-orbit | Spin-free   | Spin-orbit |
| 0 | 0.0         | 0.0        | 0.0         | 0.0        | 0.0         | 0.0        | 0.0         | 0.0        |
| 1 | 18.4        | 383.9      | 20.2        | 384.4      | 21.9        | 384.9      | 23.4        | 385.3      |
| 2 | 2713.0      | 774.4      | 2652.9      | 775.8      | 2603.7      | 777.1      | 2565.9      | 778.1      |
| 3 | 2716.4      | 1178.8     | 2656.9      | 1180.9     | 2608.2      | 1182.8     | 2570.8      | 1184.3     |
| 4 | 3544.2      | 2783.2     | 3509.4      | 2732.2     | 3479.6      | 2690.4     | 3456.8      | 2658.1     |
|   | $179^\circ$ |            | $180^\circ$ |            |             |            |             |            |
|   | Spin-free   | Spin-orbit | Spin-free   | Spin-orbit |             |            |             |            |
| 0 | 0.0         | 0.0        | 0.0         | 0.0        |             |            |             |            |

|   |        |        |        |        |  |  |  |  |
|---|--------|--------|--------|--------|--|--|--|--|
| 1 | 24.8   | 385.5  | 79.2   | 392.8  |  |  |  |  |
| 2 | 2540.2 | 778.8  | 2994.2 | 803.1  |  |  |  |  |
| 3 | 2545.2 | 1185.5 | 2995.6 | 1217.1 |  |  |  |  |
| 4 | 3441.1 | 2635.7 | 4235.7 | 3074.7 |  |  |  |  |

**Table S23.** Calculated Mulliken spin densities on Co<sup>II</sup>, N(imido) C(carbene), C(arene) and [CoN]<sup>+</sup> for **3\*** with  $\varphi$  from 171° to 180° at their spin state  $S = 3/2$  by CAS (11, 8) using CASSCF/SINGLE\_ANISO with ORCA 5.0.3.

| Spin density       | 171°     | 172°     | 173°     | 174°     | 175°     |
|--------------------|----------|----------|----------|----------|----------|
| Co <sup>II</sup>   | 2.015337 | 2.015319 | 2.015656 | 2.016370 | 2.017484 |
| N                  | 0.520753 | 0.520866 | 0.520925 | 0.520935 | 0.520899 |
| [CoN] <sup>+</sup> | 2.536090 | 2.536185 | 2.536581 | 2.537305 | 2.538383 |
| C (carbene)        | 0.175975 | 0.176785 | 0.177288 | 0.177466 | 0.177291 |
| C (arene)          | 0.045085 | 0.044888 | 0.044677 | 0.044451 | 0.044211 |
| Spin density       | 176°     | 177°     | 178°     | 179°     | 180°     |
| Co <sup>II</sup>   | 2.018948 | 2.020771 | 2.022937 | 2.025424 | 2.025518 |
| N                  | 0.520813 | 0.520686 | 0.520520 | 0.520315 | 0.520264 |
| [CoN] <sup>+</sup> | 2.539761 | 2.541457 | 2.543457 | 2.545739 | 2.545782 |
| C (carbene)        | 0.176771 | 0.175904 | 0.174700 | 0.173173 | 0.173026 |
| C (arene)          | 0.043963 | 0.043709 | 0.043450 | 0.043190 | 0.042934 |

**Table S24.** Calculated crystal field parameters  $B(k, q)$  and the corresponding weights of **3\*** with  $\varphi$  from 171° to 180° by CAS (11, 8) using CASSCF/SINGLE\_ANISO with ORCA 5.0.3.

| 171° |     |                       |            | 172° |     |                        |            | 173° |     |                        |            |
|------|-----|-----------------------|------------|------|-----|------------------------|------------|------|-----|------------------------|------------|
| $k$  | $q$ | $B(k, q)$             | Weight (%) | $k$  | $q$ | $B(k, q)$              | Weight (%) | $k$  | $q$ | $B(k, q)$              | Weight (%) |
| 2    | -2  | $0.59 \times 10^2$    | 9.20       | 2    | -2  | $0.56 \times 10^2$     | 8.95       | 2    | -2  | $-0.66 \times 10^2$    | 10.95      |
| 2    | -1  | $0.13 \times 10^2$    | 2.04       | 2    | -1  | $0.71 \times 10^1$     | 1.13       | 2    | -1  | $-0.82 \times 10^1$    | 1.37       |
| 2    | 0   | $-0.85 \times 10^2$   | 13.25      | 2    | 0   | $-0.85 \times 10^2$    | 13.57      | 2    | 0   | $-0.86 \times 10^2$    | 14.34      |
| 2    | 1   | $0.42 \times 10^1$    | 0.65       | 2    | 1   | $0.12 \times 10^2$     | 1.84       | 2    | 1   | $0.11 \times 10^2$     | 1.76       |
| 2    | 2   | $-0.50 \times 10^2$   | 7.80       | 2    | 2   | $0.51 \times 10^2$     | 8.17       | 2    | 2   | $0.37 \times 10^2$     | 6.17       |
| 4    | -4  | $0.52 \times 10^{-1}$ | 0.22       | 4    | -4  | $-0.41 \times 10^{-1}$ | 0.18       | 4    | -4  | $0.22 \times 10^{-1}$  | 0.10       |
| 4    | -3  | $-0.15 \times 10^0$   | 0.64       | 4    | -3  | $0.31 \times 10^0$     | 1.32       | 4    | -3  | $-0.28 \times 10^0$    | 1.25       |
| 4    | -2  | $0.43 \times 10^1$    | 17.98      | 4    | -2  | $0.43 \times 10^1$     | 18.63      | 4    | -2  | $-0.50 \times 10^1$    | 22.43      |
| 4    | -1  | $-0.10 \times 10^1$   | 4.39       | 4    | -1  | $-0.47 \times 10^0$    | 2.03       | 4    | -1  | $0.48 \times 10^0$     | 2.18       |
| 4    | 0   | $-0.28 \times 10^0$   | 1.19       | 4    | 0   | $-0.18 \times 10^0$    | 0.79       | 4    | 0   | $-0.92 \times 10^{-1}$ | 0.42       |
| 4    | 1   | $-0.39 \times 10^0$   | 1.64       | 4    | 1   | $-0.82 \times 10^0$    | 3.54       | 4    | 1   | $-0.62 \times 10^0$    | 2.81       |

|             |          |                                  |            |             |          |                                  |            |             |          |                                  |            |
|-------------|----------|----------------------------------|------------|-------------|----------|----------------------------------|------------|-------------|----------|----------------------------------|------------|
| 4           | 2        | $-0.39 \times 10^1$              | 16.34      | 4           | 2        | $0.36 \times 10^1$               | 15.60      | 4           | 2        | $0.25 \times 10^1$               | 11.28      |
| 4           | 3        | $-0.29 \times 10^0$              | 1.21       | 4           | 3        | $0.12 \times 10^{-1}$            | 0.05       | 4           | 3        | $-0.97 \times 10^{-1}$           | 0.44       |
| 4           | 4        | $-0.85 \times 10^{-2}$           | 0.04       | 4           | 4        | $0.24 \times 10^{-1}$            | 0.10       | 4           | 4        | $0.36 \times 10^{-1}$            | 0.17       |
| 6           | -6       | $-0.43 \times 10^{-3}$           | 0.01       | 6           | -6       | $-0.45 \times 10^{-4}$           | 0.00       | 6           | -6       | $-0.96 \times 10^{-5}$           | 0.00       |
| 6           | -5       | $0.61 \times 10^{-3}$            | 0.02       | 6           | -5       | $-0.16 \times 10^{-2}$           | 0.05       | 6           | -5       | $-0.18 \times 10^{-3}$           | 0.01       |
| 6           | -4       | $0.84 \times 10^{-2}$            | 0.26       | 6           | -4       | $-0.70 \times 10^{-2}$           | 0.22       | 6           | -4       | $0.38 \times 10^{-2}$            | 0.13       |
| 6           | -3       | $0.37 \times 10^{-2}$            | 0.11       | 6           | -3       | $-0.18 \times 10^{-2}$           | 0.06       | 6           | -3       | $0.81 \times 10^{-4}$            | 0.00       |
| 6           | -2       | $0.19 \times 10^0$               | 5.95       | 6           | -2       | $0.20 \times 10^0$               | 6.43       | 6           | -2       | $-0.23 \times 10^0$              | 7.74       |
| 6           | -1       | $0.40 \times 10^{-1}$            | 1.25       | 6           | -1       | $0.32 \times 10^{-1}$            | 1.00       | 6           | -1       | $-0.37 \times 10^{-1}$           | 1.22       |
| 6           | 0        | $-0.32 \times 10^0$              | 9.88       | 6           | 0        | $-0.31 \times 10^0$              | 9.89       | 6           | 0        | $-0.31 \times 10^0$              | 10.22      |
| 6           | 1        | $0.49 \times 10^{-2}$            | 0.15       | 6           | 1        | $0.31 \times 10^{-1}$            | 0.97       | 6           | 1        | $0.29 \times 10^{-1}$            | 0.95       |
| 6           | 2        | $-0.18 \times 10^0$              | 5.61       | 6           | 2        | $0.16 \times 10^0$               | 5.13       | 6           | 2        | $0.11 \times 10^0$               | 3.61       |
| 6           | 3        | $-0.14 \times 10^{-3}$           | 0.00       | 6           | 3        | $0.39 \times 10^{-2}$            | 0.12       | 6           | 3        | $0.46 \times 10^{-2}$            | 0.15       |
| 6           | 4        | $-0.16 \times 10^{-2}$           | 0.05       | 6           | 4        | $0.43 \times 10^{-2}$            | 0.14       | 6           | 4        | $0.68 \times 10^{-2}$            | 0.23       |
| 6           | 5        | $-0.29 \times 10^{-2}$           | 0.09       | 6           | 5        | $0.23 \times 10^{-2}$            | 0.07       | 6           | 5        | $0.25 \times 10^{-2}$            | 0.08       |
| 6           | 6        | $-0.34 \times 10^{-3}$           | 0.01       | 6           | 6        | $0.26 \times 10^{-3}$            | 0.01       | 6           | 6        | $0.14 \times 10^{-4}$            | 0.00       |
| <b>174°</b> |          |                                  |            | <b>175°</b> |          |                                  |            | <b>176°</b> |          |                                  |            |
| <i>k</i>    | <i>q</i> | <i>B</i> ( <i>k</i> , <i>q</i> ) | Weight (%) | <i>k</i>    | <i>q</i> | <i>B</i> ( <i>k</i> , <i>q</i> ) | Weight (%) | <i>k</i>    | <i>q</i> | <i>B</i> ( <i>k</i> , <i>q</i> ) | Weight (%) |
| 2           | -2       | $-0.57 \times 10^2$              | 9.53       | 2           | -2       | $-0.34 \times 10^2$              | 6.05       | 2           | -2       | $0.72 \times 10^2$               | 15.11      |
| 2           | -1       | $0.12 \times 10^2$               | 2.07       | 2           | -1       | $-0.12 \times 10^2$              | 2.22       | 2           | -1       | $0.90 \times 10^1$               | 1.89       |
| 2           | 0        | $-0.86 \times 10^2$              | 14.54      | 2           | 0        | $-0.87 \times 10^2$              | 15.47      | 2           | 0        | $-0.87 \times 10^2$              | 18.27      |
| 2           | 1        | $-0.46 \times 10^1$              | 0.77       | 2           | 1        | $0.26 \times 10^1$               | 0.47       | 2           | 1        | $0.79 \times 10^1$               | 1.67       |
| 2           | 2        | $-0.47 \times 10^2$              | 7.98       | 2           | 2        | $-0.64 \times 10^2$              | 11.43      | 2           | 2        | $0.73 \times 10^{-1}$            | 0.02       |
| 4           | -4       | $-0.38 \times 10^{-1}$           | 0.17       | 4           | -4       | $-0.24 \times 10^{-1}$           | 0.12       | 4           | -4       | $0.13 \times 10^{-1}$            | 0.08       |
| 4           | -3       | $-0.13 \times 10^0$              | 0.59       | 4           | -3       | $0.22 \times 10^0$               | 1.07       | 4           | -3       | $0.11 \times 10^0$               | 0.65       |
| 4           | -2       | $-0.41 \times 10^1$              | 18.55      | 4           | -2       | $-0.24 \times 10^1$              | 11.67      | 4           | -2       | $0.53 \times 10^1$               | 29.96      |
| 4           | -1       | $-0.56 \times 10^0$              | 2.54       | 4           | -1       | $0.36 \times 10^0$               | 1.72       | 4           | -1       | $-0.18 \times 10^0$              | 1.00       |
| 4           | 0        | $0.44 \times 10^{-3}$            | 0.00       | 4           | 0        | $0.87 \times 10^{-1}$            | 0.42       | 4           | 0        | $0.16 \times 10^0$               | 0.89       |
| 4           | 1        | $0.19 \times 10^0$               | 0.85       | 4           | 1        | $-0.54 \times 10^{-1}$           | 0.26       | 4           | 1        | $-0.77 \times 10^{-1}$           | 0.44       |
| 4           | 2        | $-0.36 \times 10^1$              | 16.59      | 4           | 2        | $-0.48 \times 10^1$              | 23.10      | 4           | 2        | $-0.23 \times 10^0$              | 1.32       |
| 4           | 3        | $0.25 \times 10^0$               | 1.13       | 4           | 3        | $-0.15 \times 10^0$              | 0.73       | 4           | 3        | $-0.23 \times 10^0$              | 1.31       |
| 4           | 4        | $-0.54 \times 10^{-2}$           | 0.02       | 4           | 4        | $-0.24 \times 10^{-1}$           | 0.11       | 4           | 4        | $0.27 \times 10^{-1}$            | 0.15       |
| 6           | -6       | $-0.15 \times 10^{-3}$           | 0.01       | 6           | -6       | $-0.37 \times 10^{-3}$           | 0.01       | 6           | -6       | $-0.47 \times 10^{-3}$           | 0.02       |
| 6           | -5       | $0.49 \times 10^{-3}$            | 0.02       | 6           | -5       | $0.11 \times 10^{-2}$            | 0.04       | 6           | -5       | $0.18 \times 10^{-2}$            | 0.07       |
| 6           | -4       | $-0.77 \times 10^{-2}$           | 0.25       | 6           | -4       | $-0.50 \times 10^{-2}$           | 0.18       | 6           | -4       | $0.36 \times 10^{-2}$            | 0.15       |
| 6           | -3       | $0.34 \times 10^{-2}$            | 0.11       | 6           | -3       | $-0.22 \times 10^{-2}$           | 0.08       | 6           | -3       | $0.31 \times 10^{-2}$            | 0.13       |
| 6           | -2       | $-0.19 \times 10^0$              | 6.22       | 6           | -2       | $-0.11 \times 10^0$              | 3.91       | 6           | -2       | $0.25 \times 10^0$               | 10.33      |
| 6           | -1       | $0.49 \times 10^{-1}$            | 1.64       | 6           | -1       | $-0.54 \times 10^{-1}$           | 1.93       | 6           | -1       | $0.48 \times 10^{-1}$            | 2.01       |
| 6           | 0        | $-0.30 \times 10^0$              | 10.10      | 6           | 0        | $-0.29 \times 10^0$              | 10.47      | 6           | 0        | $-0.29 \times 10^0$              | 12.13      |
| 6           | 1        | $-0.11 \times 10^{-1}$           | 0.36       | 6           | 1        | $0.74 \times 10^{-2}$            | 0.26       | 6           | 1        | $0.29 \times 10^{-1}$            | 1.20       |
| 6           | 2        | $-0.17 \times 10^0$              | 5.82       | 6           | 2        | $-0.23 \times 10^0$              | 8.02       | 6           | 2        | $-0.20 \times 10^{-1}$           | 0.83       |
| 6           | 3        | $-0.16 \times 10^{-3}$           | 0.01       | 6           | 3        | $-0.48 \times 10^{-3}$           | 0.02       | 6           | 3        | $0.24 \times 10^{-2}$            | 0.10       |
| 6           | 4        | $-0.14 \times 10^{-2}$           | 0.05       | 6           | 4        | $-0.52 \times 10^{-2}$           | 0.19       | 6           | 4        | $0.60 \times 10^{-2}$            | 0.25       |





|   |    |                        |       |  |  |  |  |  |  |  |
|---|----|------------------------|-------|--|--|--|--|--|--|--|
| 4 | 1  | -0.38×10 <sup>0</sup>  | 2.04  |  |  |  |  |  |  |  |
| 4 | 2  | -0.11×10 <sup>1</sup>  | 6.15  |  |  |  |  |  |  |  |
| 4 | 3  | -0.47×10 <sup>-1</sup> | 0.26  |  |  |  |  |  |  |  |
| 4 | 4  | 0.16×10 <sup>-1</sup>  | 0.09  |  |  |  |  |  |  |  |
| 6 | -6 | -0.44×10 <sup>-3</sup> | 0.02  |  |  |  |  |  |  |  |
| 6 | -5 | 0.98×10 <sup>-3</sup>  | 0.04  |  |  |  |  |  |  |  |
| 6 | -4 | 0.43×10 <sup>-2</sup>  | 0.17  |  |  |  |  |  |  |  |
| 6 | -3 | 0.71×10 <sup>-3</sup>  | 0.03  |  |  |  |  |  |  |  |
| 6 | -2 | 0.23×10 <sup>0</sup>   | 9.27  |  |  |  |  |  |  |  |
| 6 | -1 | -0.37×10 <sup>-1</sup> | 1.48  |  |  |  |  |  |  |  |
| 6 | 0  | -0.28×10 <sup>0</sup>  | 11.22 |  |  |  |  |  |  |  |
| 6 | 1  | -0.27×10 <sup>-1</sup> | 1.07  |  |  |  |  |  |  |  |
| 6 | 2  | -0.63×10 <sup>-1</sup> | 2.49  |  |  |  |  |  |  |  |
| 6 | 3  | -0.11×10 <sup>-2</sup> | 0.04  |  |  |  |  |  |  |  |
| 6 | 4  | 0.35×10 <sup>-2</sup>  | 0.14  |  |  |  |  |  |  |  |
| 6 | 5  | -0.24×10 <sup>-3</sup> | 0.01  |  |  |  |  |  |  |  |
| 6 | 6  | 0.83×10 <sup>-3</sup>  | 0.03  |  |  |  |  |  |  |  |

**Table S25.** Calculated energy levels (cm<sup>-1</sup>),  $g$  ( $g_x$ ,  $g_y$ ,  $g_z$ ) tensors and predominant  $m_J$  values in the lowest five KDs for **3\*** with Co=N bond length ranging from 1.48 to 2.18 Å by CAS (11, 8) using CASSCF/SINGLE\_ANISO with ORCA 5.0.3.

| KDs | 1.48 Å             |        |       | 1.58 Å             |        |       | 1.68 Å             |        |       |
|-----|--------------------|--------|-------|--------------------|--------|-------|--------------------|--------|-------|
|     | $E/\text{cm}^{-1}$ | $g$    | $m_J$ | $E/\text{cm}^{-1}$ | $g$    | $m_J$ | $E/\text{cm}^{-1}$ | $g$    | $m_J$ |
| 0   | 0.0                | 0.004  | ±9/2  | 0.0                | 0.007  | ±9/2  | 0.0                | 0.005  | ±9/2  |
|     |                    | 0.005  |       |                    | 0.007  |       |                    | 0.006  |       |
|     |                    | 10.360 |       |                    | 10.592 |       |                    | 10.750 |       |
| 1   | 339.0              | 0.018  | ±5/2  | 368.5              | 0.158  | ±5/2  | 382.5              | 0.137  | ±5/2  |
|     |                    | 0.025  |       |                    | 0.164  |       |                    | 0.142  |       |
|     |                    | 6.357  |       |                    | 6.562  |       |                    | 6.706  |       |
| 2   | 697.4              | 0.308  | ±3/2  | 745.0              | 0.149  | ±3/2  | 771.2              | 0.175  | ±3/2  |
|     |                    | 0.334  |       |                    | 0.494  |       |                    | 0.479  |       |
|     |                    | 2.348  |       |                    | 2.529  |       |                    | 2.659  |       |
| 3   | 1079.7             | 0.246  | ±1/2  | 1136.1             | 0.235  | ±1/2  | 1174.0             | 0.223  | ±1/2  |
|     |                    | 0.260  |       |                    | 0.246  |       |                    | 0.238  |       |
|     |                    | 1.684  |       |                    | 1.511  |       |                    | 1.393  |       |
| 4   | 1736.3             | 0.007  | ±7/2  | 2409.1             | 0.010  | ±7/2  | 2901.7             | 0.035  | ±7/2  |

|     |                    |                          |           |                    |                          |           |                    |                          |           |
|-----|--------------------|--------------------------|-----------|--------------------|--------------------------|-----------|--------------------|--------------------------|-----------|
|     |                    | 0.008                    |           |                    | 0.014                    |           |                    | 0.054                    |           |
|     |                    | 10.203                   |           |                    | 10.073                   |           |                    | 10.278                   |           |
| KDs | <b>1.78 Å</b>      |                          |           | <b>1.88 Å</b>      |                          |           | <b>1.98 Å</b>      |                          |           |
|     | $E/\text{cm}^{-1}$ | $g$                      | $m_J$     | $E/\text{cm}^{-1}$ | $g$                      | $m_J$     | $E/\text{cm}^{-1}$ | $g$                      | $m_J$     |
| 0   | 0.0                | 0.003<br>0.004<br>10.926 | $\pm 9/2$ | 0.0                | 0.002<br>0.002<br>11.202 | $\pm 9/2$ | 0.0                | 0.000<br>0.000<br>11.497 | $\pm 9/2$ |
| 1   | 394.6              | 0.069<br>0.072<br>6.878  | $\pm 7/2$ | 411.3              | 0.021<br>0.021<br>7.169  | $\pm 7/2$ | 424.4              | 0.011<br>0.011<br>7.511  | $\pm 7/2$ |
| 2   | 795.5              | 0.242<br>0.415<br>2.820  | $\pm 3/2$ | 830.7              | 0.238<br>0.317<br>3.115  | $\pm 3/2$ | 861.0              | 0.133<br>0.176<br>3.517  | $\pm 3/2$ |
| 3   | 1212.7             | 0.205<br>0.235<br>1.246  | $\pm 1/2$ | 1268.6             | 0.135<br>0.212<br>0.967  | $\pm 1/2$ | 1320.6             | 0.055<br>0.168<br>0.498  | $\pm 1/2$ |
| 4   | 2733.9             | 0.092<br>0.119<br>11.134 | $\pm 5/2$ | 2157.1             | 0.107<br>0.280<br>10.135 | $\pm 5/2$ | 1523.4             | 4.489<br>3.107<br>1.376  | $\pm 5/2$ |
| KDs | <b>2.08 Å</b>      |                          |           | <b>2.18 Å</b>      |                          |           |                    |                          |           |
|     | $E/\text{cm}^{-1}$ | $g$                      | $m_J$     | $E/\text{cm}^{-1}$ | $g$                      | $m_J$     |                    |                          |           |
| 0   | 0.0                | 0.001<br>0.001<br>11.318 | $\pm 9/2$ | 0.0                | 0.006<br>0.006<br>7.938  | $\pm 7/2$ |                    |                          |           |
| 1   | 412.7              | 0.049<br>0.058<br>7.727  | $\pm 7/2$ | 152.0              | 0.000<br>0.000<br>11.521 | $\pm 9/2$ |                    |                          |           |
| 2   | 817.5              | 0.112<br>0.236           | $\pm 1/2$ | 789.1              | 0.011<br>0.049           | $\pm 3/2$ |                    |                          |           |

|   |        |                         |           |        |                         |           |  |  |  |
|---|--------|-------------------------|-----------|--------|-------------------------|-----------|--|--|--|
|   |        | 4.034                   |           |        | 4.033                   |           |  |  |  |
| 3 | 916.5  | 1.041<br>1.096<br>4.333 | $\pm 3/2$ | 814.7  | 0.015<br>0.017<br>7.490 | $\pm 5/2$ |  |  |  |
| 4 | 1160.5 | 0.418<br>0.897<br>7.262 | $\pm 5/2$ | 1462.9 | 0.321<br>0.329<br>3.771 | $\pm 1/2$ |  |  |  |

**Table S26.** Calculated spin-free and spin-orbit energy ( $\text{cm}^{-1}$ ) of the lowest five KDs for **3\*** with Co=N from 1.48 to 2.18 Å by CAS (11, 8) using CASSCF/SINGLE\_ANISO with ORCA 5.0.3.

|   | 1.48 Å    |            | 1.58 Å    |            | 1.68 Å    |            | 1.78 Å    |            |
|---|-----------|------------|-----------|------------|-----------|------------|-----------|------------|
|   | Spin-free | Spin-orbit | Spin-free | Spin-orbit | Spin-free | Spin-orbit | Spin-free | Spin-orbit |
| 0 | 0.0       | 0.0        | 0.0       | 0.0        | 0.0       | 0.0        | 0.0       | 0.0        |
| 1 | 28.0      | 339.0      | 16.0      | 368.5      | 14.8      | 382.5      | 9.0       | 394.6      |
| 2 | 9966.2    | 697.4      | 2333.3    | 745.0      | 2851.5    | 771.2      | 2723.8    | 795.5      |
| 3 | 10906.3   | 1079.7     | 2349.2    | 1136.1     | 2853.6    | 1174.0     | 2731.8    | 1212.7     |
| 4 | 11424.4   | 1736.3     | 4582.0    | 2409.1     | 3622.1    | 2901.7     | 3028.9    | 2733.9     |
|   | 1.88 Å    |            | 1.98 Å    |            | 2.08 Å    |            | 2.18 Å    |            |
|   | Spin-free | Spin-orbit | Spin-free | Spin-orbit | Spin-free | Spin-orbit | Spin-free | Spin-orbit |
| 0 | 0.0       | 0.0        | 0.0       | 0.0        | 0.0       | 0.0        | 0.0       | 0.0        |
| 1 | 4.3       | 411.3      | 2.4       | 424.4      | 2.3       | 412.7      | 0.5       | 152.0      |
| 2 | 2018.2    | 830.7      | 1499.8    | 861.0      | 966.8     | 817.5      | 1714.1    | 789.1      |
| 3 | 2042.1    | 1268.6     | 1525.4    | 1320.6     | 1132.9    | 916.5      | 3668.8    | 814.7      |
| 4 | 2601.2    | 2157.1     | 2021.4    | 1523.4     | 1560.8    | 1160.5     | 3910.9    | 1462.9     |

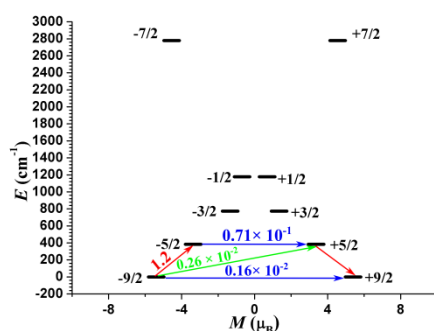

**3\***\_1.48 Å\_CAS (11, 8)\_339.0  $\text{cm}^{-1}$

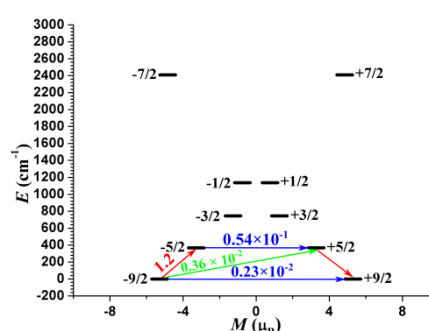

**3\***\_1.58 Å\_CAS (11, 8)\_368.5  $\text{cm}^{-1}$

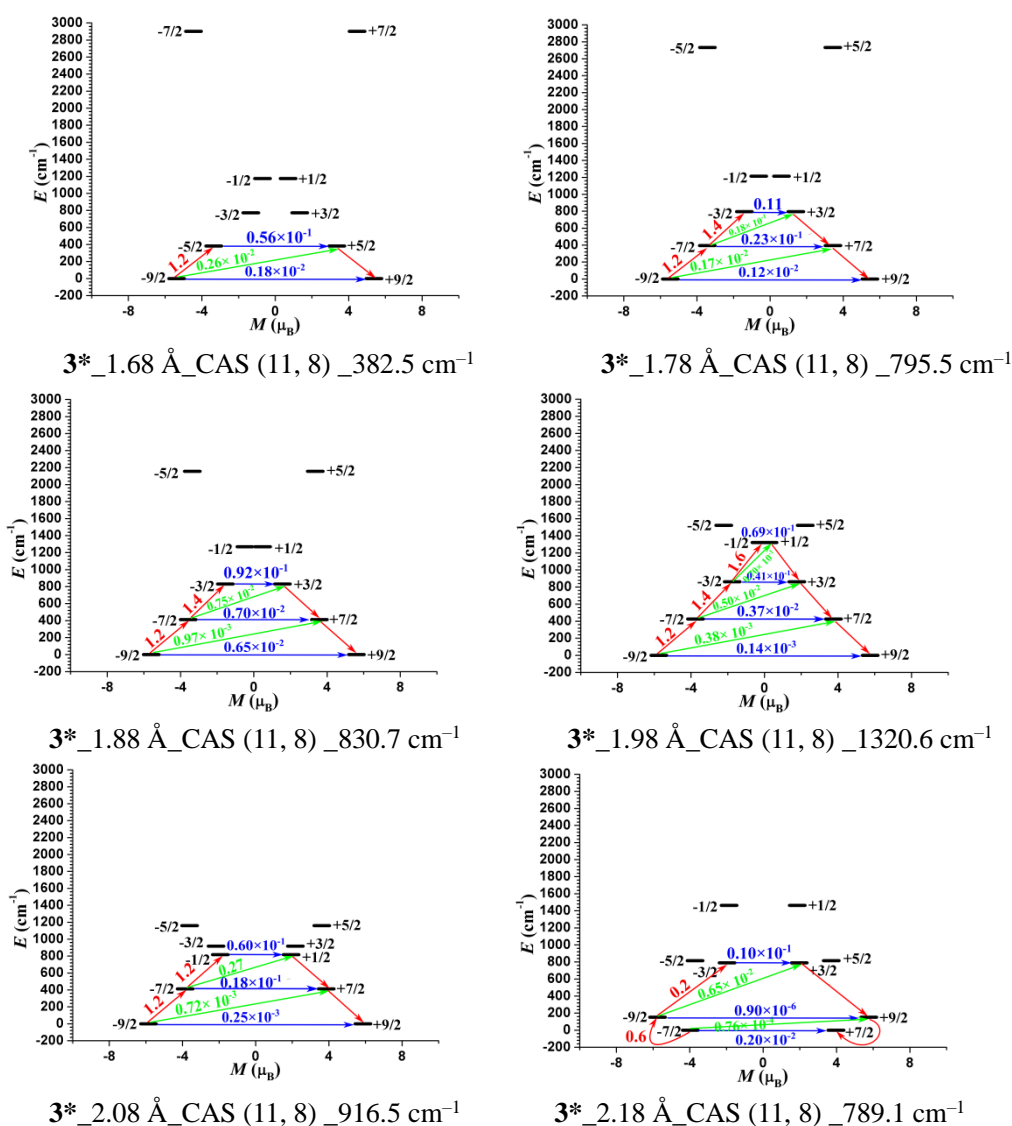

**Figure S10.** Magnetization blocking barriers for  $3^*$  (CAS (11, 8)) with Co=N bond length ranging from 1.48 to 2.18 Å. The thick black lines represent the KDs of the  $\text{Co}^{\text{II}}$  ion as a function of their magnetic moment along the magnetic axis. The blue lines correspond to diagonal matrix element of the transversal magnetic moment; the green lines represent Orbach relaxation processes. The path shown by the red arrows represent the most probable path for magnetic relaxation in the corresponding compounds. The numbers at each arrow stand for the mean absolute value of the corresponding matrix element of transition magnetic moment.

**Table S27.** Calculated Mulliken spin densities on  $\text{Co}^{\text{II}}$ , N(imido), C(carbene), C(arene) and  $[\text{CoN}]^+$  for  $3^*$  with Co=N bond length from 1.48 to 2.18 Å at their spin state  $S = 3/2$  by CAS (11, 8) using CASSCF/SINGLE\_ANISO with ORCA 5.0.3.

| Spin density            | 1.48 Å | 1.58 Å | 1.68 Å | 1.78 Å | 1.88 Å | 1.98 Å | 2.08 Å | 2.18 Å |
|-------------------------|--------|--------|--------|--------|--------|--------|--------|--------|
| $\text{Co}^{\text{II}}$ | 2.0013 | 2.0130 | 2.0157 | 2.0160 | 2.0158 | 2.0157 | 2.0159 | 2.3308 |
| N                       | 0.4931 | 0.5094 | 0.5209 | 0.5284 | 0.5329 | 0.5354 | 0.5363 | 0.5179 |
| $[\text{CoN}]^+$        | 2.4943 | 2.5224 | 2.5367 | 2.5444 | 2.5488 | 2.5511 | 2.5522 | 2.8487 |

|            |        |        |        |        |        |        |        |         |
|------------|--------|--------|--------|--------|--------|--------|--------|---------|
| C(carbene) | 0.1717 | 0.1733 | 0.1773 | 0.1811 | 0.1843 | 0.1868 | 0.1587 | -0.0171 |
| C(arene)   | 0.0624 | 0.0518 | 0.0447 | 0.0394 | 0.0353 | 0.0321 | 0.0298 | 0.0215  |

**Table S28.** Calculated crystal field parameters  $B(k, q)$  and the corresponding weights of  $\mathbf{3}^*$  with Co=N bond length from 1.48 to 2.18 Å by CAS (11, 8) using CASSCF/SINGLE\_ANISO with ORCA 5.0.3.

| 1.48 Å |     |                        |            | 1.58 Å |     |                        |            | 1.68 Å |     |                        |            |
|--------|-----|------------------------|------------|--------|-----|------------------------|------------|--------|-----|------------------------|------------|
| $k$    | $q$ | $B(k, q)$              | Weight (%) | $k$    | $q$ | $B(k, q)$              | Weight (%) | $k$    | $q$ | $B(k, q)$              | Weight (%) |
| 2      | -2  | $0.35 \times 10^{-3}$  | 0.00       | 2      | -2  | $-0.10 \times 10^{-1}$ | 0.00       | 2      | -2  | $0.68 \times 10^2$     | 11.62      |
| 2      | -1  | $-0.37 \times 10^{-3}$ | 0.00       | 2      | -1  | $-0.16 \times 10^2$    | 2.51       | 2      | -1  | $0.12 \times 10^2$     | 2.06       |
| 2      | 0   | $-0.11 \times 10^3$    | 13.32      | 2      | 0   | $-0.98 \times 10^2$    | 15.79      | 2      | 0   | $-0.85 \times 10^2$    | 14.67      |
| 2      | 1   | $-0.14 \times 10^2$    | 1.72       | 2      | 1   | $-0.34 \times 10^{-3}$ | 0.00       | 2      | 1   | $0.61 \times 10^1$     | 1.04       |
| 2      | 2   | $0.13 \times 10^3$     | 16.50      | 2      | 2   | $-0.10 \times 10^3$    | 16.51      | 2      | 2   | $-0.30 \times 10^2$    | 5.24       |
| 4      | -4  | $0.41 \times 10^{-4}$  | 0.00       | 4      | -4  | $-0.22 \times 10^{-4}$ | 0.00       | 4      | -4  | $0.39 \times 10^{-1}$  | 0.18       |
| 4      | -3  | $-0.14 \times 10^{-3}$ | 0.00       | 4      | -3  | $0.36 \times 10^0$     | 1.55       | 4      | -3  | $-0.35 \times 10^{-1}$ | 0.17       |
| 4      | -2  | $0.13 \times 10^{-4}$  | 0.00       | 4      | -2  | $-0.83 \times 10^{-3}$ | 0.00       | 4      | -2  | $0.49 \times 10^1$     | 22.82      |
| 4      | -1  | $-0.12 \times 10^{-4}$ | 0.00       | 4      | -1  | $0.15 \times 10^1$     | 6.51       | 4      | -1  | $-0.60 \times 10^0$    | 2.80       |
| 4      | 0   | $0.43 \times 10^1$     | 14.59      | 4      | 0   | $0.18 \times 10^1$     | 7.87       | 4      | 0   | $-0.64 \times 10^{-1}$ | 0.30       |
| 4      | 1   | $0.27 \times 10^1$     | 9.28       | 4      | 1   | $0.14 \times 10^{-3}$  | 0.00       | 4      | 1   | $-0.28 \times 10^0$    | 1.33       |
| 4      | 2   | $0.81 \times 10^1$     | 27.79      | 4      | 2   | $-0.69 \times 10^1$    | 30.09      | 4      | 2   | $-0.24 \times 10^1$    | 11.42      |
| 4      | 3   | $-0.42 \times 10^0$    | 1.45       | 4      | 3   | $-0.50 \times 10^{-4}$ | 0.00       | 4      | 3   | $-0.28 \times 10^0$    | 1.33       |
| 4      | 4   | $-0.57 \times 10^{-1}$ | 0.20       | 4      | 4   | $-0.39 \times 10^{-1}$ | 0.17       | 4      | 4   | $0.13 \times 10^{-1}$  | 0.06       |
| 6      | -6  | $0.97 \times 10^{-6}$  | 0.00       | 6      | -6  | $0.41 \times 10^{-5}$  | 0.00       | 6      | -6  | $0.34 \times 10^{-5}$  | 0.00       |
| 6      | -5  | $0.33 \times 10^{-5}$  | 0.00       | 6      | -5  | $0.26 \times 10^{-2}$  | 0.08       | 6      | -5  | $0.17 \times 10^{-2}$  | 0.06       |
| 6      | -4  | $0.11 \times 10^{-6}$  | 0.00       | 6      | -4  | $-0.73 \times 10^{-5}$ | 0.00       | 6      | -4  | $0.73 \times 10^{-2}$  | 0.25       |
| 6      | -3  | $0.38 \times 10^{-5}$  | 0.00       | 6      | -3  | $0.14 \times 10^{-2}$  | 0.05       | 6      | -3  | $0.39 \times 10^{-2}$  | 0.13       |
| 6      | -2  | $0.17 \times 10^{-4}$  | 0.00       | 6      | -2  | $-0.47 \times 10^{-4}$ | 0.00       | 6      | -2  | $0.22 \times 10^0$     | 7.66       |
| 6      | -1  | $0.52 \times 10^{-4}$  | 0.00       | 6      | -1  | $0.17 \times 10^{-1}$  | 0.55       | 6      | -1  | $0.50 \times 10^{-1}$  | 1.71       |
| 6      | 0   | $-0.11 \times 10^0$    | 2.79       | 6      | 0   | $-0.27 \times 10^0$    | 8.49       | 6      | 0   | $-0.30 \times 10^0$    | 10.36      |
| 6      | 1   | $0.15 \times 10^0$     | 3.75       | 6      | 1   | $-0.13 \times 10^{-4}$ | 0.00       | 6      | 1   | $0.15 \times 10^{-1}$  | 0.52       |
| 6      | 2   | $0.32 \times 10^0$     | 8.03       | 6      | 2   | $-0.30 \times 10^0$    | 9.49       | 6      | 2   | $-0.12 \times 10^0$    | 4.09       |
| 6      | 3   | $-0.60 \times 10^{-2}$ | 0.15       | 6      | 3   | $0.78 \times 10^{-5}$  | 0.00       | 6      | 3   | $0.12 \times 10^{-2}$  | 0.04       |
| 6      | 4   | $-0.11 \times 10^{-1}$ | 0.29       | 6      | 4   | $-0.91 \times 10^{-2}$ | 0.29       | 6      | 4   | $0.21 \times 10^{-2}$  | 0.07       |
| 6      | 5   | $0.20 \times 10^{-2}$  | 0.05       | 6      | 5   | $-0.34 \times 10^{-5}$ | 0.00       | 6      | 5   | $-0.16 \times 10^{-2}$ | 0.06       |
| 6      | 6   | $-0.37 \times 10^{-2}$ | 0.09       | 6      | 6   | $0.12 \times 10^{-2}$  | 0.04       | 6      | 6   | $0.25 \times 10^{-4}$  | 0.00       |
| 1.78 Å |     |                        |            | 1.88 Å |     |                        |            | 1.98 Å |     |                        |            |
| $k$    | $q$ | $B(k, q)$              | Weight (%) | $k$    | $q$ | $B(k, q)$              | Weight (%) | $k$    | $q$ | $B(k, q)$              | Weight (%) |
| 2      | -2  | $0.28 \times 10^2$     | 5.51       | 2      | -2  | $0.21 \times 10^2$     | 5.04       | 2      | -2  | $0.88 \times 10^{-3}$  | 0.00       |
| 2      | -1  | $-0.39 \times 10^1$    | 0.77       | 2      | -1  | $0.39 \times 10^1$     | 0.94       | 2      | -1  | $-0.11 \times 10^2$    | 4.49       |
| 2      | 0   | $-0.72 \times 10^2$    | 14.22      | 2      | 0   | $-0.64 \times 10^2$    | 15.29      | 2      | 0   | $-0.73 \times 10^2$    | 28.99      |
| 2      | 1   | $-0.98 \times 10^1$    | 1.93       | 2      | 1   | $0.60 \times 10^1$     | 1.44       | 2      | 1   | $0.45 \times 10^{-1}$  | 0.01       |
| 2      | 2   | $0.41 \times 10^2$     | 8.12       | 2      | 2   | $0.19 \times 10^2$     | 4.63       | 2      | 2   | $0.41 \times 10^1$     | 1.64       |

|               |          |                                  |            |               |          |                                  |            |   |    |                        |       |
|---------------|----------|----------------------------------|------------|---------------|----------|----------------------------------|------------|---|----|------------------------|-------|
| 4             | -4       | -0.45×10 <sup>-1</sup>           | 0.24       | 4             | -4       | -0.31×10 <sup>-1</sup>           | 0.25       | 4 | -4 | 0.14×10 <sup>-3</sup>  | 0.00  |
| 4             | -3       | -0.21×10 <sup>0</sup>            | 1.13       | 4             | -3       | 0.19×10 <sup>0</sup>             | 1.23       | 4 | -3 | -0.24×10 <sup>0</sup>  | 2.65  |
| 4             | -2       | 0.25×10 <sup>1</sup>             | 13.72      | 4             | -2       | 0.23×10 <sup>1</sup>             | 15.44      | 4 | -2 | 0.25×10 <sup>-3</sup>  | 0.00  |
| 4             | -1       | 0.10×10 <sup>0</sup>             | 0.58       | 4             | -1       | 0.66×10 <sup>-1</sup>            | 0.43       | 4 | -1 | -0.22×10 <sup>1</sup>  | 24.29 |
| 4             | 0        | -0.13×10 <sup>1</sup>            | 7.18       | 4             | 0        | -0.21×10 <sup>1</sup>            | 13.61      | 4 | 0  | -0.60×10 <sup>0</sup>  | 6.44  |
| 4             | 1        | 0.14×10 <sup>0</sup>             | 0.79       | 4             | 1        | 0.26×10 <sup>0</sup>             | 1.74       | 4 | 1  | -0.10×10 <sup>-2</sup> | 0.01  |
| 4             | 2        | 0.33×10 <sup>1</sup>             | 17.55      | 4             | 2        | 0.15×10 <sup>1</sup>             | 10.32      | 4 | 2  | -0.54×10 <sup>0</sup>  | 5.83  |
| 4             | 3        | -0.85×10 <sup>-1</sup>           | 0.45       | 4             | 3        | -0.29×10 <sup>-1</sup>           | 0.19       | 4 | 3  | -0.11×10 <sup>-3</sup> | 0.00  |
| 4             | 4        | 0.30×10 <sup>-2</sup>            | 0.02       | 4             | 4        | 0.31×10 <sup>-1</sup>            | 0.21       | 4 | 4  | -0.44×10 <sup>-1</sup> | 0.47  |
| 6             | -6       | 0.76×10 <sup>-3</sup>            | 0.03       | 6             | -6       | -0.36×10 <sup>-3</sup>           | 0.02       | 6 | -6 | 0.60×10 <sup>-5</sup>  | 0.00  |
| 6             | -5       | 0.18×10 <sup>-2</sup>            | 0.07       | 6             | -5       | -0.94×10 <sup>-3</sup>           | 0.04       | 6 | -5 | 0.30×10 <sup>-2</sup>  | 0.23  |
| 6             | -4       | -0.55×10 <sup>-2</sup>           | 0.21       | 6             | -4       | -0.18×10 <sup>-2</sup>           | 0.09       | 6 | -4 | -0.29×10 <sup>-4</sup> | 0.00  |
| 6             | -3       | 0.49×10 <sup>-2</sup>            | 0.20       | 6             | -3       | -0.60×10 <sup>-2</sup>           | 0.29       | 6 | -3 | 0.12×10 <sup>-1</sup>  | 0.96  |
| 6             | -2       | 0.13×10 <sup>0</sup>             | 5.20       | 6             | -2       | 0.12×10 <sup>0</sup>             | 6.01       | 6 | -2 | -0.69×10 <sup>-5</sup> | 0.00  |
| 6             | -1       | -0.39×10 <sup>-1</sup>           | 1.52       | 6             | -1       | 0.66×10 <sup>-1</sup>            | 3.17       | 6 | -1 | -0.22×10 <sup>0</sup>  | 17.79 |
| 6             | 0        | -0.28×10 <sup>0</sup>            | 11.28      | 6             | 0        | -0.23×10 <sup>0</sup>            | 11.02      | 6 | 0  | 0.20×10 <sup>-1</sup>  | 1.63  |
| 6             | 1        | -0.73×10 <sup>-1</sup>           | 2.87       | 6             | 1        | 0.90×10 <sup>-1</sup>            | 4.30       | 6 | 1  | -0.10×10 <sup>-3</sup> | 0.00  |
| 6             | 2        | 0.16×10 <sup>0</sup>             | 6.29       | 6             | 2        | 0.80×10 <sup>-1</sup>            | 3.84       | 6 | 2  | -0.32×10 <sup>-1</sup> | 2.52  |
| 6             | 3        | -0.10×10 <sup>-2</sup>           | 0.04       | 6             | 3        | 0.41×10 <sup>-2</sup>            | 0.20       | 6 | 3  | 0.18×10 <sup>-5</sup>  | 0.00  |
| 6             | 4        | 0.36×10 <sup>-3</sup>            | 0.01       | 6             | 4        | 0.18×10 <sup>-2</sup>            | 0.09       | 6 | 4  | 0.20×10 <sup>-1</sup>  | 1.61  |
| 6             | 5        | -0.83×10 <sup>-3</sup>           | 0.03       | 6             | 5        | 0.31×10 <sup>-2</sup>            | 0.15       | 6 | 5  | 0.62×10 <sup>-5</sup>  | 0.00  |
| 6             | 6        | -0.67×10 <sup>-3</sup>           | 0.03       | 6             | 6        | -0.20×10 <sup>-2</sup>           | 0.10       | 6 | 6  | -0.44×10 <sup>-2</sup> | 0.34  |
| <b>2.08 Å</b> |          |                                  |            | <b>2.18 Å</b> |          |                                  |            |   |    |                        |       |
| <i>k</i>      | <i>q</i> | <i>B</i> ( <i>k</i> , <i>q</i> ) | Weight (%) | <i>k</i>      | <i>q</i> | <i>B</i> ( <i>k</i> , <i>q</i> ) | Weight (%) |   |    |                        |       |
| 2             | -2       | -0.11×10 <sup>2</sup>            | 5.11       | 2             | -2       | 0.16×10 <sup>2</sup>             | 2.34       |   |    |                        |       |
| 2             | -1       | 0.70×10 <sup>1</sup>             | 3.39       | 2             | -1       | 0.11×10 <sup>3</sup>             | 15.88      |   |    |                        |       |
| 2             | 0        | -0.61×10 <sup>2</sup>            | 29.15      | 2             | 0        | -0.32×10 <sup>2</sup>            | 4.67       |   |    |                        |       |
| 2             | 1        | 0.34×10 <sup>2</sup>             | 16.19      | 2             | 1        | -0.13×10 <sup>3</sup>            | 19.58      |   |    |                        |       |
| 2             | 2        | -0.14×10 <sup>2</sup>            | 6.70       | 2             | 2        | -0.60×10 <sup>1</sup>            | 0.87       |   |    |                        |       |
| 4             | -4       | -0.13×10 <sup>0</sup>            | 1.64       | 4             | -4       | -0.20×10 <sup>-1</sup>           | 0.08       |   |    |                        |       |
| 4             | -3       | -0.84×10 <sup>-1</sup>           | 1.09       | 4             | -3       | -0.72×10 <sup>-1</sup>           | 0.29       |   |    |                        |       |
| 4             | -2       | 0.74×10 <sup>-3</sup>            | 0.01       | 4             | -2       | -0.62×10 <sup>0</sup>            | 2.45       |   |    |                        |       |
| 4             | -1       | -0.25×10 <sup>0</sup>            | 3.32       | 4             | -1       | 0.43×10 <sup>1</sup>             | 16.87      |   |    |                        |       |
| 4             | 0        | -0.49×10 <sup>0</sup>            | 6.43       | 4             | 0        | 0.14×10 <sup>1</sup>             | 5.40       |   |    |                        |       |
| 4             | 1        | -0.60×10 <sup>0</sup>            | 7.80       | 4             | 1        | -0.12×10 <sup>1</sup>            | 4.58       |   |    |                        |       |
| 4             | 2        | -0.43×10 <sup>0</sup>            | 5.65       | 4             | 2        | 0.24×10 <sup>0</sup>             | 0.95       |   |    |                        |       |
| 4             | 3        | -0.45×10 <sup>-1</sup>           | 0.59       | 4             | 3        | 0.19×10 <sup>-1</sup>            | 0.07       |   |    |                        |       |
| 4             | 4        | 0.80×10 <sup>-2</sup>            | 0.10       | 4             | 4        | -0.16×10 <sup>-1</sup>           | 0.06       |   |    |                        |       |
| 6             | -6       | 0.34×10 <sup>-2</sup>            | 0.33       | 6             | -6       | -0.11×10 <sup>-4</sup>           | 0.00       |   |    |                        |       |
| 6             | -5       | -0.17×10 <sup>-1</sup>           | 1.65       | 6             | -5       | 0.29×10 <sup>-4</sup>            | 0.00       |   |    |                        |       |
| 6             | -4       | 0.23×10 <sup>-1</sup>            | 2.16       | 6             | -4       | -0.35×10 <sup>-2</sup>           | 0.10       |   |    |                        |       |
| 6             | -3       | 0.71×10 <sup>-2</sup>            | 0.68       | 6             | -3       | -0.87×10 <sup>-2</sup>           | 0.25       |   |    |                        |       |
| 6             | -2       | -0.11×10 <sup>-1</sup>           | 1.07       | 6             | -2       | 0.76×10 <sup>-1</sup>            | 2.23       |   |    |                        |       |

|   |    |                        |      |   |    |                        |       |  |  |  |  |
|---|----|------------------------|------|---|----|------------------------|-------|--|--|--|--|
| 6 | -1 | $0.71 \times 10^{-2}$  | 0.68 | 6 | -1 | $0.18 \times 10^0$     | 5.27  |  |  |  |  |
| 6 | 0  | $0.16 \times 10^{-1}$  | 1.54 | 6 | 0  | $0.52 \times 10^0$     | 15.15 |  |  |  |  |
| 6 | 1  | $-0.32 \times 10^{-1}$ | 3.07 | 6 | 1  | $0.63 \times 10^{-1}$  | 1.83  |  |  |  |  |
| 6 | 2  | $-0.13 \times 10^{-1}$ | 1.23 | 6 | 2  | $0.33 \times 10^{-1}$  | 0.95  |  |  |  |  |
| 6 | 3  | $-0.58 \times 10^{-3}$ | 0.06 | 6 | 3  | $0.33 \times 10^{-2}$  | 0.09  |  |  |  |  |
| 6 | 4  | $-0.81 \times 10^{-3}$ | 0.08 | 6 | 4  | $-0.89 \times 10^{-3}$ | 0.03  |  |  |  |  |
| 6 | 5  | $0.23 \times 10^{-2}$  | 0.22 | 6 | 5  | $0.14 \times 10^{-5}$  | 0.00  |  |  |  |  |
| 6 | 6  | $-0.77 \times 10^{-3}$ | 0.07 | 6 | 6  | $-0.17 \times 10^{-4}$ | 0.00  |  |  |  |  |

**Table S29.** Values of  $B_{\text{ave}}$ ,  $\mathbf{g}$  ( $g_x$ ,  $g_y$ ,  $g_z$ ) of the ground KD and the tunneling demagnetization time ( $\tau_{\text{QTM}}$ ).

| Compounds              | $B_{\text{ave}}$ (mT) | $g_x$                   | $g_y$                   | $g_z$   | $\tau_{\text{QTM}}$ (s) |
|------------------------|-----------------------|-------------------------|-------------------------|---------|-------------------------|
| $3^*_1.98 \text{ \AA}$ | 20                    | $3.9393 \times 10^{-4}$ | $4.2105 \times 10^{-4}$ | 11.4966 | $1.24 \times 10^{-1}$   |

## REFERENCE

1. L. F. Chibotaru, L. Ungur and A. Soncini, The Origin of Nonmagnetic Kramers Doublets in the Ground State of Dysprosium Triangles: Evidence for a Toroidal Magnetic Moment, *Angew. Chem., Int. Ed.*, 2008, **47**, 4126–4129.
2. L. Ungur, W. Van den Heuvel and L. F. Chibotaru, *Ab Initio* Investigation of the non-Collinear Magnetic Structure and the Lowest Magnetic Excitations in Dysprosium Triangles, *New J. Chem.*, 2009, **33**, 1224–1230.
3. L. F. Chibotaru, L. Ungur, C. Aronica, H. Elmoll, G. Pilet and D. Luneau, Structure, Magnetism, and Theoretical Study of a Mixed-Valence  $\text{Co}^{\text{II}}_3\text{Co}^{\text{III}}_4$  Heptanuclear Wheel: Lack of SMM Behavior despite Negative Magnetic Anisotropy, *J. Am. Chem. Soc.*, 2008, **130**, 12445–12455.
4. F. Neese, *ORCA—an ab initio, Density Functional and Semiempirical Program Package*, version 5.0.3, Max-Planck institute for bioinorganic chemistry, Mülheim an der Ruhr, Germany, 2021.
